# Supplementary material for: Radical Scavenging Potential of Ginkgolides and Bilobalide: Insight from Molecular Modeling
Source: MDPI journal article supplement (doi:10.3390/antiox12020525), 2023-02-19
Supplement: s1 [file s1]

## - SUPPORTING INFORMATION -

# Radical scavenging potential of ginkgolides and bilobalide: insight from molecular modeling

Davide Zeppilli <sup>1,§</sup>, Giovanni Ribaudo <sup>2,§</sup>, Nicola Pompermaier <sup>1</sup>, Andrea Madabeni <sup>1</sup>, Marco Bortoli <sup>3</sup> and Laura Orian <sup>1,\*</sup>

<sup>1</sup> Dipartimento di Scienze Chimiche Università degli Studi di Padova Via Marzolo 1 35129 Padova, Italy

<sup>2</sup> Dipartimento di Medicina Molecolare e Traslazionale, Università degli Studi di Brescia, Viale Europa 11, 25123 Brescia, Italy

<sup>3</sup> Department of Chemistry and Hylleraas Centre for Quantum Molecular Sciences, University of Oslo, Oslo 0315, Norway

\* Correspondence: laura.orian@unipd.it (L.O.)

§ These authors contributed equally

### LIST of TABLES and FIGURES:

**Table S1** Gibbs free reaction energies ( $\Delta G_{HAT}^0$ ) computed in gas-phase, water and benzene for the scavenging of  $\bullet\text{OH}$ ,  $\bullet\text{OOH}$ ,  $\bullet\text{OCH}_3$ ,  $\bullet\text{OOCH}_3$  and  $\bullet\text{OOCH}=\text{CH}_2$  via HAT from all the available sites of **1B**. Level of theory:

(SMD)-M06-2X/6-311+G(d,p)//M06-2X/6-31G(d).....3

**Figure S1** Gibbs free reaction energies ( $\Delta G_{HAT}^0$ ) computed in (a) gas-phase, (b) water and (c) benzene for the scavenging of  $\bullet\text{OH}$ ,  $\bullet\text{OOH}$ ,  $\bullet\text{OCH}_3$ ,  $\bullet\text{OOCH}_3$  and  $\bullet\text{OOCH}=\text{CH}_2$  via HAT from all the available sites of **1A**. Level of theory: (SMD)-M06-2X/6-311+G(d,p)//M06-2X/6-31G(d).....4

**Table S2** Gibbs free reaction energies ( $\Delta G_{HAT}^0$ ) computed in gas-phase, water and benzene for the scavenging of  $\bullet\text{OH}$ ,  $\bullet\text{OOH}$ ,  $\bullet\text{OCH}_3$ ,  $\bullet\text{OOCH}_3$  and  $\bullet\text{OOCH}=\text{CH}_2$  via HAT from all the available sites of **1A**. Level of theory: (SMD)-M06-2X/6-311+G(d,p)//M06-2X/6-31G(d).....4

**Figure S2** Gibbs free reaction energies ( $\Delta G_{HAT}^0$ ) computed in (a) gas-phase, (b) water and (c) benzene for the scavenging of  $\bullet\text{OH}$ ,  $\bullet\text{OOH}$ ,  $\bullet\text{OCH}_3$ ,  $\bullet\text{OOCH}_3$  and  $\bullet\text{OOCH}=\text{CH}_2$  via HAT from all the available sites of **1C**. Level of theory: (SMD)-M06-2X/6-311+G(d,p)//M06-2X/6-31G(d).....5

**Table S3** Gibbs free reaction energies ( $\Delta G_{HAT}^0$ ) computed in gas-phase, water and benzene for the scavenging of  $\bullet\text{OH}$ ,  $\bullet\text{OOH}$ ,  $\bullet\text{OCH}_3$ ,  $\bullet\text{OOCH}_3$  and  $\bullet\text{OOCH}=\text{CH}_2$  via HAT from all the available sites of **1C**. Level of theory: (SMD)-M06-2X/6-311+G(d,p)//M06-2X/6-31G(d).....5

**Figure S3** Gibbs free reaction energies ( $\Delta G_{HAT}^0$ ) computed in (a) gas-phase, (b) water and (c) benzene for the scavenging of  $\bullet\text{OH}$ ,  $\bullet\text{OOH}$ ,  $\bullet\text{OCH}_3$ ,  $\bullet\text{OOCH}_3$  and  $\bullet\text{OOCH}=\text{CH}_2$  via HAT from all the available sites of **1J**. Level of theory: (SMD)-M06-2X/6-311+G(d,p)//M06-2X/6-31G(d).....6

**Table S4** Gibbs free reaction energies ( $\Delta G_{HAT}^0$ ) computed in gas-phase, water and benzene for the scavenging of  $\bullet\text{OH}$ ,  $\bullet\text{OOH}$ ,  $\bullet\text{OCH}_3$ ,  $\bullet\text{OOCH}_3$  and  $\bullet\text{OOCH}=\text{CH}_2$  via HAT from all the available sites of **1J**. Level of theory: (SMD)-M06-2X/6-311+G(d,p)//M06-2X/6-31G(d).....6

**Figure S4** Gibbs free reaction energies ( $\Delta G_{HAT}^0$ ) computed in (a) gas-phase, (b) water and (c) benzene for the scavenging of  $\cdot\text{OH}$ ,  $\cdot\text{OOH}$ ,  $\cdot\text{OCH}_3$ ,  $\cdot\text{OOCH}_3$  and  $\cdot\text{OOCH}=\text{CH}_2$  via HAT from all the available sites of **1M**. Level of theory: (SMD)-M06-2X/6-311+G(d,p)//M06-2X/6-31G(d).....7

**Table S5** Gibbs free reaction energies ( $\Delta G_{HAT}^0$ ) computed in gas-phase, water and benzene for the scavenging of  $\cdot\text{OH}$ ,  $\cdot\text{OOH}$ ,  $\cdot\text{OCH}_3$ ,  $\cdot\text{OOCH}_3$  and  $\cdot\text{OOCH}=\text{CH}_2$  via HAT from all the available sites of **1M**. Level of theory: (SMD)-M06-2X/6-311+G(d,p)//M06-2X/6-31G(d).....7

**Table S6** Gibbs free reaction energies ( $\Delta G_{HAT}^0$ ) computed in gas-phase, water and benzene for the scavenging of  $\cdot\text{OH}$ ,  $\cdot\text{OOH}$ ,  $\cdot\text{OCH}_3$ ,  $\cdot\text{OOCH}_3$  and  $\cdot\text{OOCH}=\text{CH}_2$  via HAT from all the available sites of **1B**. Level of theory: (SMD)-M06-2X/6-311+G(d,p)//M06-2X/6-31G(d).....8

**Table S7** Gibbs free reaction energies ( $\Delta G_{HAT}^0$  kcal mol<sup>-1</sup>) computed in water of **1B** and **1B**<sup>-</sup> for the scavenging of  $\cdot\text{OH}$  via HAT from C1, C2, C14 and C3OH sites. Level of theory: M06-2X/6-311+G(d,p)//M06-2X/6-31G(d).....8

**Table S8** Gibbs free reaction energies ( $\Delta G_{HAT}^0$  kcal mol<sup>-1</sup>) computed in gas-phase, water and benzene, for the scavenging of  $\cdot\text{OH}$ ,  $\cdot\text{OOH}$ ,  $\cdot\text{OCH}_3$ ,  $\cdot\text{OOCH}_3$  and  $\cdot\text{OOCH}=\text{CH}_2$  via HAT from neutral Trolox<sup>[a]</sup> (**3**, Scheme 1 in the text). For comparison the values of HAT from C10 of **1B** and **1B**<sup>-</sup> are also included. Level of theory: (SMD)-M06-2X/6-311+G(d,p)//M06-2X/6-31G(d).....9

**Table S9** Gibbs free reaction energies ( $\Delta G_{HAT}^0$  kcal mol<sup>-1</sup>) computed in gas-phase, water and benzene, for the scavenging of  $\cdot\text{OH}$ ,  $\cdot\text{OOH}$ ,  $\cdot\text{OCH}_3$ ,  $\cdot\text{OOCH}_3$  and  $\cdot\text{OOCH}=\text{CH}_2$  via HAT from C4 site of melatonin<sup>[a]</sup> (**4**, Scheme 1 in the text). Two lowest energy conformers of melatonin have been considered<sup>[b]</sup>. For comparison the values of HAT from C10 of **1B** and **1B**<sup>-</sup> are also included. Level of theory: (SMD)-M06-2X/6-311+G(d,p)//M06-2X/6-31G(d).....9

**Figure S5** Gibbs free reaction energies ( $\Delta G_{HAT}^0$ ) computed in (a) gas-phase, (b) water and (c) benzene for the scavenging of  $\cdot\text{OH}$ ,  $\cdot\text{OOH}$ ,  $\cdot\text{OCH}_3$ ,  $\cdot\text{OOCH}_3$  and  $\cdot\text{OOCH}=\text{CH}_2$  via HAT from all the available sites of **2**. Level of theory: (SMD)-M06-2X/6-311+G(d,p)//M06-2X/6-31G(d).....10

**Table S10** Gibbs free reaction energies ( $\Delta G_{HAT}^0$ ) computed in gas-phase, water and benzene for the scavenging of  $\cdot\text{OH}$ ,  $\cdot\text{OOH}$ ,  $\cdot\text{OCH}_3$ ,  $\cdot\text{OOCH}_3$  and  $\cdot\text{OOCH}=\text{CH}_2$  via HAT from all the available sites of **2**. Level of theory: (SMD)-M06-2X/6-311+G(d,p)//M06-2X/6-31G(d).....10

**Table S11** Coordinates of the structures of **1A-M**, **1B**<sup>-</sup>, **2** and their radicals at each available site. Level of theory: M06-2X/6-31G(d).....11

**Table S12** Coordinates and imaginary frequencies of the transition state of the HAT from C10 site of **1B** to each ROS. Level of theory: M06-2X/6-31G(d).....45

**Table S13** Coordinates and imaginary frequencies of the transition state of the HAT from C10OH site of **1B** to each ROS. Level of theory: M06-2X/6-31G(d).....47

**Table S14** Coordinates and imaginary frequencies of the transition state of the HAT from C10 site of **1B**<sup>-</sup> to each ROS. Level of theory: M06-2X/6-31G(d).....49

**Table S15** Coordinates of the structures of the five ROSs, their anion and protonated forms. Level of theory: M06-2X/6-31G(d).....51

**Table S1** Gibbs free reaction energies ( $\Delta G_{HAT}^o$ ) computed in gas-phase, water and benzene for the scavenging of  $\bullet\text{OH}$ ,  $\bullet\text{OOH}$ ,  $\bullet\text{OCH}_3$ ,  $\bullet\text{OOCH}_3$  and  $\bullet\text{OOCH}=\text{CH}_2$  via HAT from all the available sites of **1B**. Level of theory: (SMD)-M06-2X/6-311+G(d,p)//M06-2X/6-31G(d).

|              | $\Delta G_{HAT}^o$ |                     |                       |                        |                                  | $\Delta G_{HAT,water}^o$ |                     |                       |                        |                                  | $\Delta G_{HAT,benzene}^o$ |                     |                       |                        |                                  |
|--------------|--------------------|---------------------|-----------------------|------------------------|----------------------------------|--------------------------|---------------------|-----------------------|------------------------|----------------------------------|----------------------------|---------------------|-----------------------|------------------------|----------------------------------|
|              | $\bullet\text{OH}$ | $\bullet\text{OOH}$ | $\bullet\text{OCH}_3$ | $\bullet\text{OOCH}_3$ | $\bullet\text{OOCH}=\text{CH}_2$ | $\bullet\text{OH}$       | $\bullet\text{OOH}$ | $\bullet\text{OCH}_3$ | $\bullet\text{OOCH}_3$ | $\bullet\text{OOCH}=\text{CH}_2$ | $\bullet\text{OH}$         | $\bullet\text{OOH}$ | $\bullet\text{OCH}_3$ | $\bullet\text{OOCH}_3$ | $\bullet\text{OOCH}=\text{CH}_2$ |
| <b>C1</b>    | -28.27             | 3.72                | -13.37                | 5.32                   | 2.43                             | -28.64                   | 4.24                | -13.14                | 5.51                   | 1.96                             | -28.41                     | 4.03                | -12.94                | 5.90                   | 2.56                             |
| <b>C2</b>    | -16.94             | 15.05               | -2.04                 | 16.65                  | 13.76                            | -17.70                   | 15.17               | -2.20                 | 16.44                  | 12.89                            | -16.96                     | 15.48               | -1.49                 | 17.35                  | 14.01                            |
| <b>C6</b>    | -15.41             | 16.58               | -0.51                 | 18.17                  | 15.29                            | -17.66                   | 15.21               | -2.16                 | 16.48                  | 12.93                            | -15.56                     | 16.88               | -0.09                 | 18.75                  | 15.41                            |
| <b>C7</b>    | -18.73             | 13.27               | -3.82                 | 14.86                  | 11.97                            | -22.38                   | 10.50               | -6.88                 | 11.77                  | 8.22                             | -19.48                     | 12.97               | -4.01                 | 14.83                  | 11.50                            |
| <b>C8</b>    | -24.95             | 7.04                | -10.05                | 8.63                   | 5.74                             | -27.82                   | 5.05                | -12.33                | 6.32                   | 2.77                             | -25.70                     | 6.74                | -10.24                | 8.61                   | 5.27                             |
| <b>C8tBu</b> | -17.83             | 14.16               | -2.93                 | 15.76                  | 12.87                            | -20.59                   | 12.29               | -5.09                 | 13.56                  | 10.00                            | -18.13                     | 14.31               | -2.66                 | 16.18                  | 12.84                            |
| <b>C10</b>   | -34.38             | -2.39               | -19.48                | -0.79                  | -3.68                            | -39.35                   | -6.47               | -23.85                | -5.20                  | -8.75                            | -35.92                     | -3.48               | -20.45                | -1.61                  | -4.95                            |
| <b>C12</b>   | -17.24             | 14.76               | -2.34                 | 16.35                  | 13.46                            | -17.91                   | 14.97               | -2.40                 | 16.24                  | 12.69                            | -16.96                     | 15.49               | -1.49                 | 17.35                  | 14.01                            |
| <b>C14</b>   | -26.55             | 5.45                | -11.64                | 7.04                   | 4.15                             | -29.59                   | 3.29                | -14.09                | 4.55                   | 1.00                             | -26.98                     | 5.47                | -11.51                | 7.33                   | 3.99                             |
| <b>C14Me</b> | -17.40             | 14.59               | -2.50                 | 16.18                  | 13.30                            | -20.31                   | 12.56               | -4.81                 | 13.83                  | 10.28                            | -17.74                     | 14.71               | -2.27                 | 16.57                  | 13.24                            |
| <b>C10OH</b> | -10.70             | 21.30               | 4.20                  | 22.89                  | 20.00                            | -12.68                   | 20.20               | 2.82                  | 21.47                  | 17.92                            | -11.80                     | 20.64               | 3.67                  | 22.51                  | 19.17                            |
| <b>C3OH</b>  | -11.48             | 20.51               | 3.42                  | 22.10                  | 19.22                            | -11.73                   | 21.15               | 3.77                  | 22.42                  | 18.86                            | -11.70                     | 20.74               | 3.77                  | 22.61                  | 19.27                            |
| <b>C10OH</b> | -10.27             | 21.72               | 4.63                  | 23.32                  | 20.43                            | -12.49                   | 20.39               | 3.02                  | 21.66                  | 18.11                            | -11.28                     | 21.16               | 4.19                  | 23.03                  | 19.69                            |

**Figure S1** Gibbs free reaction energies ( $\Delta G_{HAT}^0$ ) computed in (a) gas-phase, (b) water and (c) benzene for the scavenging of  $\bullet\text{OH}$ ,  $\bullet\text{OOH}$ ,  $\bullet\text{OCH}_3$ ,  $\bullet\text{OOCH}_3$  and  $\bullet\text{OOCH}=\text{CH}_2$  via HAT from all the available sites of **1A**. Level of theory: (SMD)-M06-2X/6-311+G(d,p)//M06-2X/6-31G(d).

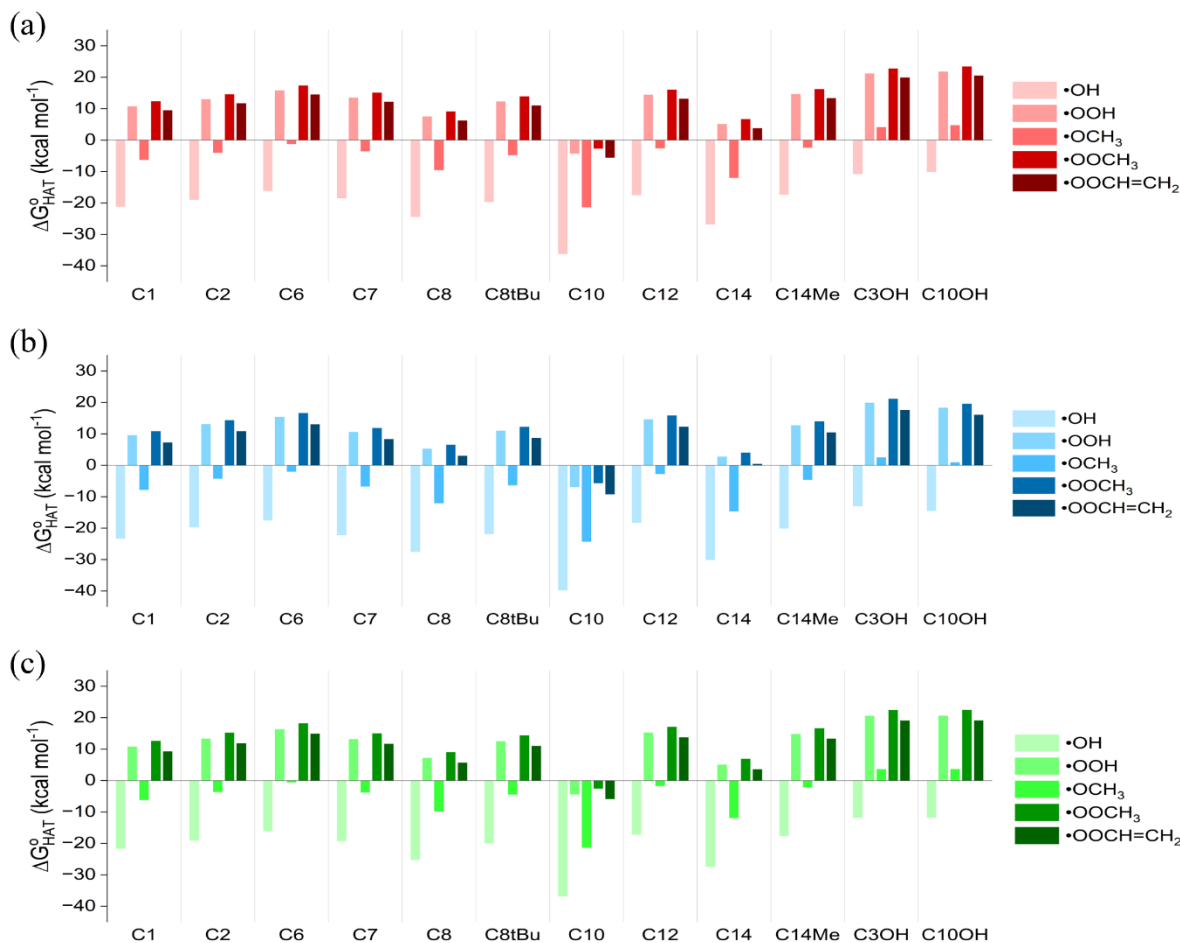

**Table S2** Gibbs free reaction energies ( $\Delta G_{HAT}^0$ ) computed in gas-phase, water and benzene for the scavenging of  $\bullet\text{OH}$ ,  $\bullet\text{OOH}$ ,  $\bullet\text{OCH}_3$ ,  $\bullet\text{OOCH}_3$  and  $\bullet\text{OOCH}=\text{CH}_2$  via HAT from all the available sites of **1A**. Level of theory: (SMD)-M06-2X/6-311+G(d,p)//M06-2X/6-31G(d).

|              | $\Delta G_{HAT}^0$ |                     |                       |                        |                                  | $\Delta G_{HAT,water}^0$ |                     |                       |                        |                                  | $\Delta G_{HAT,benzene}^0$ |                     |                       |                        |                                  |
|--------------|--------------------|---------------------|-----------------------|------------------------|----------------------------------|--------------------------|---------------------|-----------------------|------------------------|----------------------------------|----------------------------|---------------------|-----------------------|------------------------|----------------------------------|
|              | $\bullet\text{OH}$ | $\bullet\text{OOH}$ | $\bullet\text{OCH}_3$ | $\bullet\text{OOCH}_3$ | $\bullet\text{OOCH}=\text{CH}_2$ | $\bullet\text{OH}$       | $\bullet\text{OOH}$ | $\bullet\text{OCH}_3$ | $\bullet\text{OOCH}_3$ | $\bullet\text{OOCH}=\text{CH}_2$ | $\bullet\text{OH}$         | $\bullet\text{OOH}$ | $\bullet\text{OCH}_3$ | $\bullet\text{OOCH}_3$ | $\bullet\text{OOCH}=\text{CH}_2$ |
| <b>C1</b>    | -21.21             | 10.79               | -6.31                 | 12.38                  | 9.49                             | -23.33                   | 9.55                | -7.83                 | 10.82                  | 7.27                             | -21.68                     | 10.77               | -6.21                 | 12.63                  | 9.29                             |
| <b>C2</b>    | -18.99             | 13.01               | -4.09                 | 14.60                  | 11.71                            | -19.78                   | 13.10               | -4.28                 | 14.36                  | 10.81                            | -19.10                     | 13.34               | -3.63                 | 15.21                  | 11.87                            |
| <b>C6</b>    | -16.18             | 15.81               | -1.28                 | 17.41                  | 14.52                            | -17.54                   | 15.34               | -2.03                 | 16.61                  | 13.06                            | -16.09                     | 16.35               | -0.62                 | 18.22                  | 14.88                            |
| <b>C7</b>    | -18.49             | 13.50               | -3.59                 | 15.09                  | 12.20                            | -22.26                   | 10.62               | -6.76                 | 11.88                  | 8.33                             | -19.28                     | 13.16               | -3.81                 | 15.03                  | 11.69                            |
| <b>C8</b>    | -24.45             | 7.54                | -9.55                 | 9.13                   | 6.25                             | -27.60                   | 5.28                | -12.10                | 6.55                   | 3.00                             | -25.25                     | 7.19                | -9.78                 | 9.06                   | 5.72                             |
| <b>C8tBu</b> | -19.70             | 12.30               | -4.80                 | 13.89                  | 11.00                            | -21.88                   | 11.00               | -6.38                 | 12.27                  | 8.71                             | -19.94                     | 12.50               | -4.48                 | 14.37                  | 11.03                            |
| <b>C10</b>   | -36.29             | -4.29               | -21.38                | -2.70                  | -5.59                            | -39.83                   | -6.96               | -24.33                | -5.69                  | -9.24                            | -36.88                     | -4.44               | -21.41                | -2.57                  | -5.91                            |
| <b>C12</b>   | -17.52             | 14.47               | -2.62                 | 16.07                  | 13.18                            | -18.30                   | 14.58               | -2.80                 | 15.85                  | 12.29                            | -17.19                     | 15.25               | -1.72                 | 17.12                  | 13.78                            |
| <b>C14</b>   | -26.89             | 5.10                | -11.99                | 6.69                   | 3.80                             | -30.13                   | 2.75                | -14.63                | 4.02                   | 0.46                             | -27.38                     | 5.06                | -11.91                | 6.93                   | 3.59                             |
| <b>C14Me</b> | -17.35             | 14.65               | -2.44                 | 16.24                  | 13.35                            | -20.16                   | 12.72               | -4.66                 | 13.99                  | 10.43                            | -17.63                     | 14.81               | -2.16                 | 16.68                  | 13.34                            |
| <b>C3OH</b>  | -10.80             | 21.20               | 4.11                  | 22.79                  | 19.90                            | -12.98                   | 19.89               | 2.52                  | 21.16                  | 17.61                            | -11.84                     | 20.60               | 3.63                  | 22.47                  | 19.13                            |
| <b>C10OH</b> | -10.15             | 21.85               | 4.76                  | 23.44                  | 20.55                            | -14.54                   | 18.34               | 0.96                  | 19.61                  | 16.06                            | -11.81                     | 20.63               | 3.65                  | 22.50                  | 19.16                            |

**Figure S2** Gibbs free reaction energies ( $\Delta G_{HAT}^0$ ) computed in (a) gas-phase, (b) water and (c) benzene for the scavenging of  $\cdot\text{OH}$ ,  $\cdot\text{OOH}$ ,  $\cdot\text{OCH}_3$ ,  $\cdot\text{OOCH}_3$  and  $\cdot\text{OOCH}=\text{CH}_2$  via HAT from all the available sites of **1C**. Level of theory: (SMD)-M06-2X/6-311+G(d,p)//M06-2X/6-31G(d).

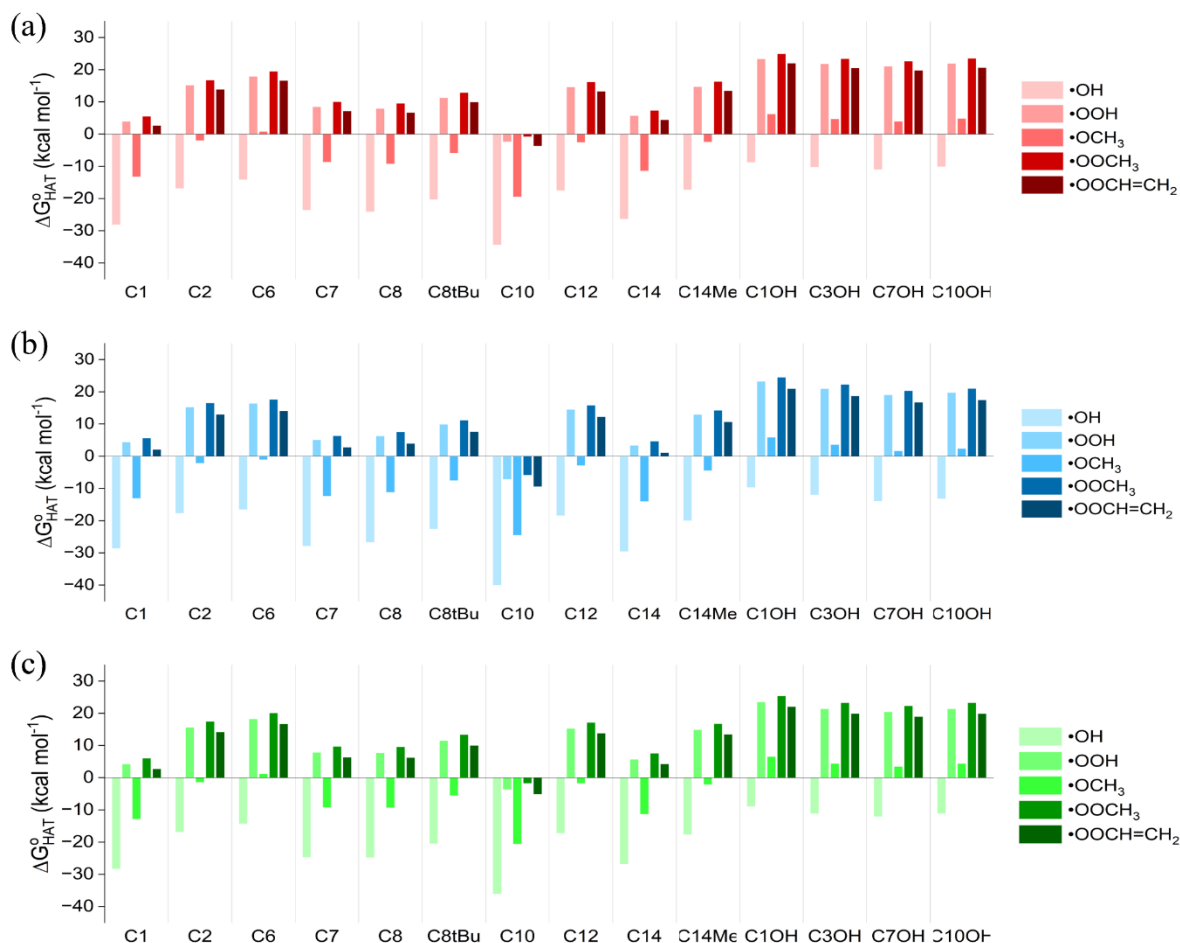

**Table S3** Gibbs free reaction energies ( $\Delta G_{HAT}^0$ ) computed in gas-phase, water and benzene for the scavenging of  $\cdot\text{OH}$ ,  $\cdot\text{OOH}$ ,  $\cdot\text{OCH}_3$ ,  $\cdot\text{OOCH}_3$  and  $\cdot\text{OOCH}=\text{CH}_2$  via HAT from all the available sites of **1C**. Level of theory: (SMD)-M06-2X/6-311+G(d,p)//M06-2X/6-31G(d).

|              | $\Delta G_{HAT}^0$ |                   |                     |                      |                                | $\Delta G_{HAT,water}^0$ |                   |                     |                      |                                | $\Delta G_{HAT,benzene}^0$ |                   |                     |                      |                                |
|--------------|--------------------|-------------------|---------------------|----------------------|--------------------------------|--------------------------|-------------------|---------------------|----------------------|--------------------------------|----------------------------|-------------------|---------------------|----------------------|--------------------------------|
|              | $\cdot\text{OH}$   | $\cdot\text{OOH}$ | $\cdot\text{OCH}_3$ | $\cdot\text{OOCH}_3$ | $\cdot\text{OOCH}=\text{CH}_2$ | $\cdot\text{OH}$         | $\cdot\text{OOH}$ | $\cdot\text{OCH}_3$ | $\cdot\text{OOCH}_3$ | $\cdot\text{OOCH}=\text{CH}_2$ | $\cdot\text{OH}$           | $\cdot\text{OOH}$ | $\cdot\text{OCH}_3$ | $\cdot\text{OOCH}_3$ | $\cdot\text{OOCH}=\text{CH}_2$ |
| <b>C1</b>    | -28.10             | 3.90              | -13.19              | 5.49                 | 2.60                           | -28.53                   | 4.35              | -13.03              | 5.61                 | 2.06                           | -28.28                     | 4.17              | -12.81              | 6.03                 | 2.69                           |
| <b>C2</b>    | -16.86             | 15.14             | -1.96               | 16.73                | 13.84                          | -17.65                   | 15.23             | -2.15               | 16.50                | 12.95                          | -16.86                     | 15.58             | -1.39               | 17.45                | 14.11                          |
| <b>C6</b>    | -14.13             | 17.87             | 0.78                | 19.46                | 16.57                          | -16.53                   | 16.34             | -1.03               | 17.61                | 14.06                          | -14.28                     | 18.16             | 1.19                | 20.03                | 16.69                          |
| <b>C7</b>    | -23.56             | 8.44              | -8.66               | 10.03                | 7.14                           | -27.87                   | 5.01              | -12.37              | 6.28                 | 2.73                           | -24.66                     | 7.79              | -9.19               | 9.65                 | 6.32                           |
| <b>C8</b>    | -24.09             | 7.90              | -9.19               | 9.49                 | 6.60                           | -26.68                   | 6.20              | -11.18              | 7.47                 | 3.92                           | -24.77                     | 7.67              | -9.30               | 9.54                 | 6.20                           |
| <b>C8tBu</b> | -20.27             | 11.23             | -5.87               | 12.82                | 9.93                           | -22.53                   | 9.84              | -7.53               | 11.11                | 7.56                           | -20.50                     | 11.44             | -5.53               | 13.31                | 9.97                           |
| <b>C10</b>   | -34.35             | -2.35             | -19.45              | -0.76                | -3.65                          | -39.99                   | -7.11             | -24.49              | -5.84                | -9.39                          | -36.06                     | -3.62             | -20.59              | -1.75                | -5.09                          |
| <b>C12</b>   | -17.45             | 14.55             | -2.55               | 16.14                | 13.25                          | -18.40                   | 14.48             | -2.90               | 15.75                | 12.19                          | -17.23                     | 15.22             | -1.76               | 17.08                | 13.75                          |
| <b>C14</b>   | -26.31             | 5.68              | -11.41              | 7.28                 | 4.39                           | -29.54                   | 3.34              | -14.04              | 4.61                 | 1.05                           | -26.78                     | 5.66              | -11.32              | 7.53                 | 4.19                           |
| <b>C14Me</b> | -17.31             | 14.69             | -2.40               | 16.28                | 13.39                          | -19.97                   | 12.91             | -4.47               | 14.18                | 10.63                          | -17.58                     | 14.86             | -2.11               | 16.73                | 13.39                          |
| <b>C10H</b>  | -8.72              | 23.27             | 6.18                | 24.86                | 21.98                          | -9.68                    | 23.20             | 5.82                | 24.47                | 20.92                          | -8.97                      | 23.47             | 6.50                | 25.34                | 22.00                          |
| <b>C3OH</b>  | -10.24             | 21.75             | 4.66                | 23.34                | 20.46                          | -11.94                   | 20.94             | 3.56                | 22.21                | 18.66                          | -11.10                     | 21.34             | 4.37                | 23.21                | 19.87                          |
| <b>C7OH</b>  | -10.98             | 21.01             | 3.92                | 22.61                | 19.72                          | -13.90                   | 18.98             | 1.60                | 20.25                | 16.70                          | -12.05                     | 20.40             | 3.42                | 22.26                | 18.93                          |
| <b>C10OH</b> | -10.10             | 21.89             | 4.80                | 23.48                | 20.60                          | -13.18                   | 19.70             | 2.32                | 20.97                | 17.42                          | -11.11                     | 21.33             | 4.35                | 23.20                | 19.86                          |

**Figure S3** Gibbs free reaction energies ( $\Delta G_{HAT}^0$ ) computed in (a) gas-phase, (b) water and (c) benzene for the scavenging of  $\cdot\text{OH}$ ,  $\cdot\text{OOH}$ ,  $\cdot\text{OCH}_3$ ,  $\cdot\text{OOCH}_3$  and  $\cdot\text{OOCH}=\text{CH}_2$  via HAT from all the available sites of **1J**. Level of theory: (SMD)-M06-2X/6-311+G(d,p)//M06-2X/6-31G(d).

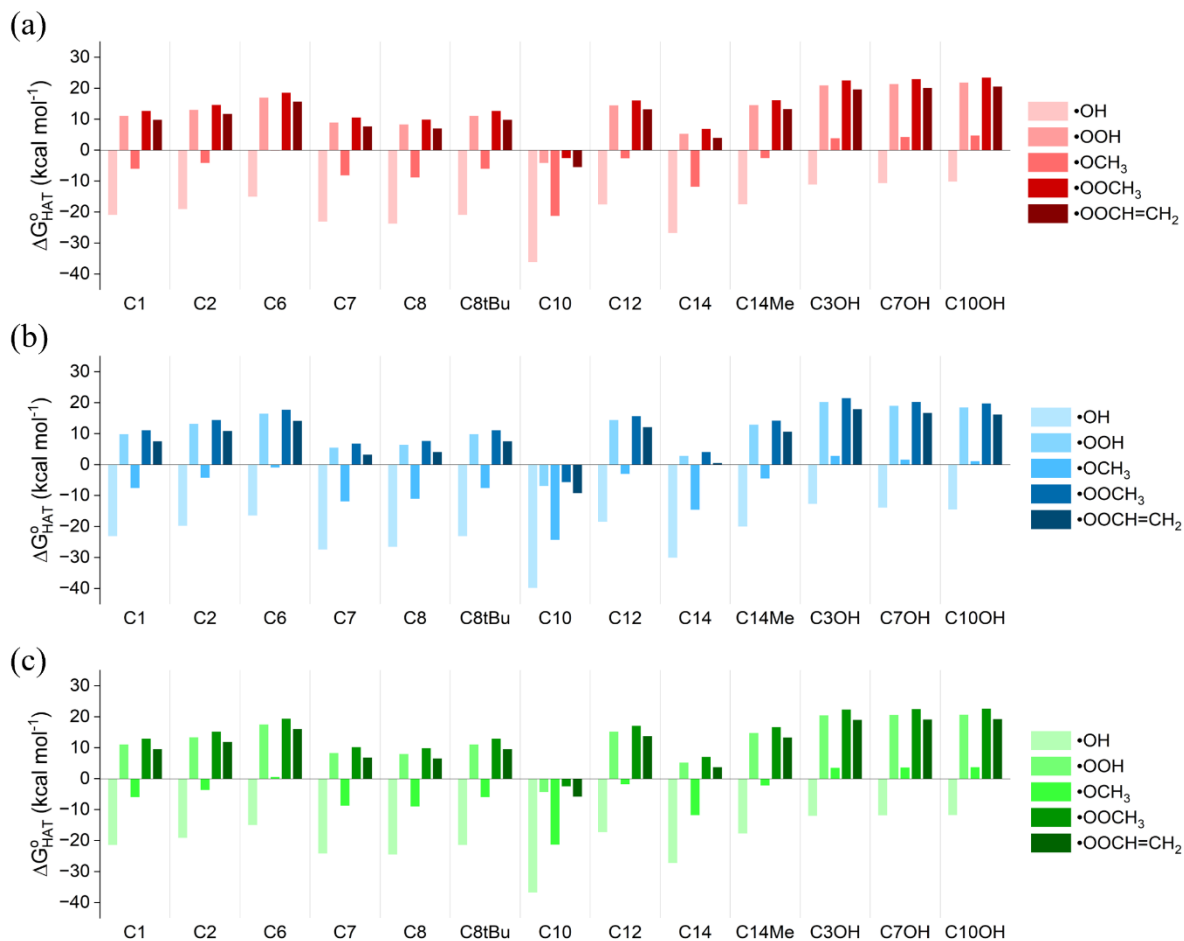

**Table S4** Gibbs free reaction energies ( $\Delta G_{HAT}^0$ ) computed in gas-phase, water and benzene for the scavenging of  $\cdot\text{OH}$ ,  $\cdot\text{OOH}$ ,  $\cdot\text{OCH}_3$ ,  $\cdot\text{OOCH}_3$  and  $\cdot\text{OOCH}=\text{CH}_2$  via HAT from all the available sites of **1J**. Level of theory: (SMD)-M06-2X/6-311+G(d,p)//M06-2X/6-31G(d).

|              | $\Delta G_{HAT}^0$ |                   |                     |                      |                                | $\Delta G_{HAT,water}^0$ |                   |                     |                      |                                | $\Delta G_{HAT,benzene}^0$ |                   |                     |                      |                                |
|--------------|--------------------|-------------------|---------------------|----------------------|--------------------------------|--------------------------|-------------------|---------------------|----------------------|--------------------------------|----------------------------|-------------------|---------------------|----------------------|--------------------------------|
|              | $\cdot\text{OH}$   | $\cdot\text{OOH}$ | $\cdot\text{OCH}_3$ | $\cdot\text{OOCH}_3$ | $\cdot\text{OOCH}=\text{CH}_2$ | $\cdot\text{OH}$         | $\cdot\text{OOH}$ | $\cdot\text{OCH}_3$ | $\cdot\text{OOCH}_3$ | $\cdot\text{OOCH}=\text{CH}_2$ | $\cdot\text{OH}$           | $\cdot\text{OOH}$ | $\cdot\text{OCH}_3$ | $\cdot\text{OOCH}_3$ | $\cdot\text{OOCH}=\text{CH}_2$ |
| <b>C1</b>    | -20.92             | 11.07             | -6.02               | 12.66                | 9.78                           | -23.08                   | 9.80              | -7.58               | 11.07                | 7.52                           | -21.41                     | 11.03             | -5.94               | 12.90                | 9.56                           |
| <b>C2</b>    | -19.02             | 12.98             | -4.12               | 14.57                | 11.68                          | -19.75                   | 13.13             | -4.25               | 14.40                | 10.85                          | -19.11                     | 13.33             | -3.65               | 15.20                | 11.86                          |
| <b>C6</b>    | -15.03             | 16.96             | -0.13               | 18.55                | 15.66                          | -16.45                   | 16.43             | -0.95               | 17.70                | 14.14                          | -14.94                     | 17.51             | 0.53                | 19.37                | 16.03                          |
| <b>C7</b>    | -23.09             | 8.91              | -8.19               | 10.50                | 7.61                           | -27.39                   | 5.48              | -11.89              | 6.75                 | 3.20                           | -24.15                     | 8.29              | -8.69               | 10.16                | 6.82                           |
| <b>C8</b>    | -23.70             | 8.29              | -8.80               | 9.88                 | 6.99                           | -26.54                   | 6.34              | -11.03              | 7.61                 | 4.06                           | -24.46                     | 7.99              | -8.99               | 9.85                 | 6.52                           |
| <b>C8tBu</b> | -20.92             | 11.07             | -6.02               | 12.66                | 9.78                           | -23.08                   | 9.80              | -7.58               | 11.07                | 7.52                           | -21.41                     | 11.03             | -5.94               | 12.90                | 9.56                           |
| <b>C10</b>   | -36.14             | -4.15             | -21.24              | -2.56                | -5.45                          | -39.81                   | -6.94             | -24.31              | -5.67                | -9.22                          | -36.77                     | -4.33             | -21.31              | -2.46                | -5.80                          |
| <b>C12</b>   | -17.54             | 14.46             | -2.63               | 16.05                | 13.16                          | -18.51                   | 14.37             | -3.01               | 15.64                | 12.08                          | -17.26                     | 15.18             | -1.80               | 17.05                | 13.71                          |
| <b>C14</b>   | -26.75             | 5.25              | -11.84              | 6.84                 | 3.95                           | -30.08                   | 2.80              | -14.58              | 4.07                 | 0.51                           | -27.25                     | 5.19              | -11.78              | 7.06                 | 3.72                           |
| <b>C14Me</b> | -17.45             | 14.55             | -2.55               | 16.14                | 13.25                          | -19.98                   | 12.89             | -4.48               | 14.16                | 10.61                          | -17.68                     | 14.76             | -2.22               | 16.63                | 13.29                          |
| <b>C3OH</b>  | -11.10             | 20.89             | 3.80                | 22.48                | 19.60                          | -12.70                   | 20.18             | 2.80                | 21.44                | 17.89                          | -11.99                     | 20.45             | 3.48                | 22.32                | 18.98                          |
| <b>C7OH</b>  | -10.67             | 21.32             | 4.23                | 22.92                | 20.03                          | -13.91                   | 18.97             | 1.59                | 20.23                | 16.68                          | -11.85                     | 20.59             | 3.62                | 22.46                | 19.12                          |
| <b>C10OH</b> | -10.19             | 21.81             | 4.72                | 23.40                | 20.51                          | -14.44                   | 18.44             | 1.06                | 19.71                | 16.15                          | -11.75                     | 20.69             | 3.72                | 22.56                | 19.22                          |

**Figure S4** Gibbs free reaction energies ( $\Delta G_{HAT}^0$ ) computed in (a) gas-phase, (b) water and (c) benzene for the scavenging of  $\bullet\text{OH}$ ,  $\bullet\text{OOH}$ ,  $\bullet\text{OCH}_3$ ,  $\bullet\text{OOCH}_3$  and  $\bullet\text{OOCH}=\text{CH}_2$  via HAT from all the available sites of **1M**. Level of theory: (SMD)-M06-2X/6-311+G(d,p)//M06-2X/6-31G(d).

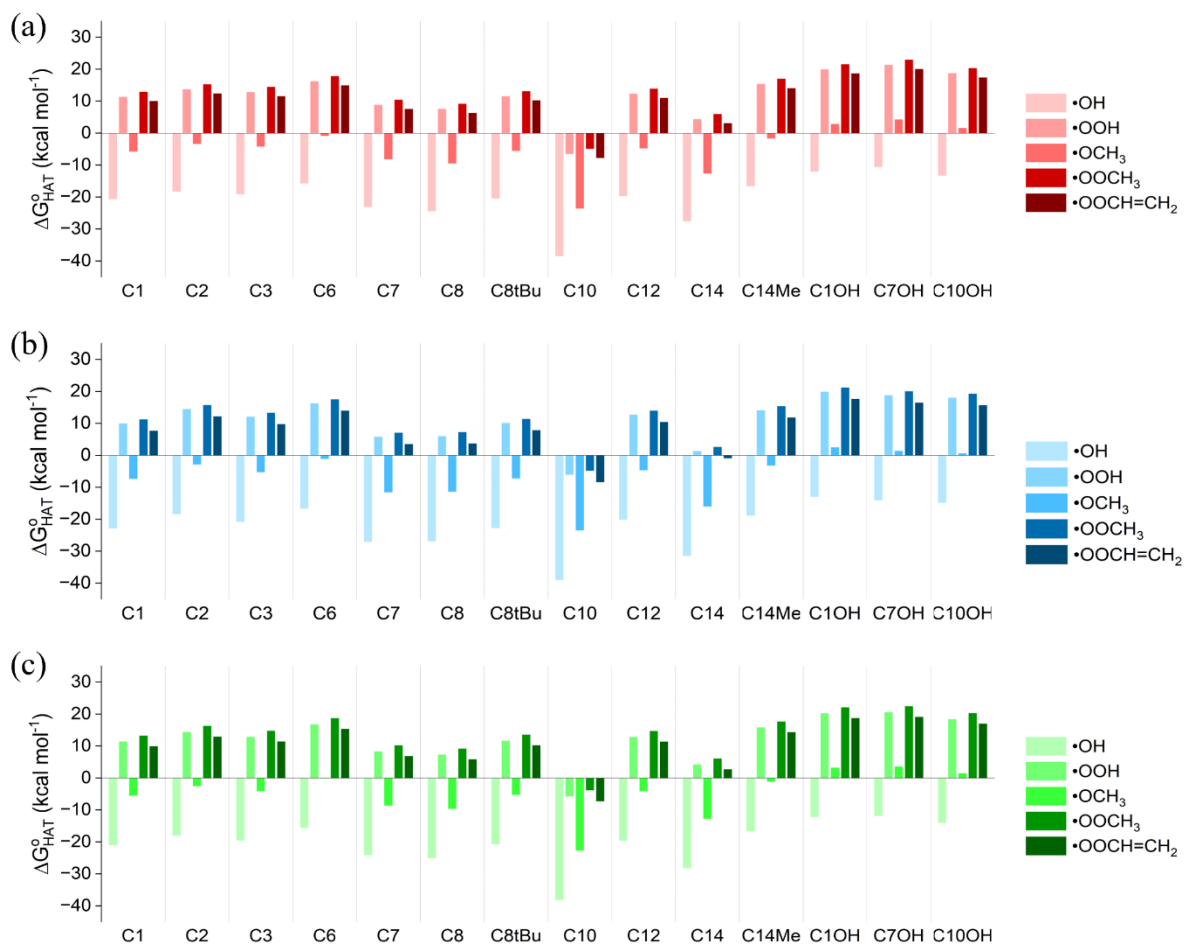

**Table S5** Gibbs free reaction energies ( $\Delta G_{HAT}^0$ ) computed in gas-phase, water and benzene for the scavenging of  $\bullet\text{OH}$ ,  $\bullet\text{OOH}$ ,  $\bullet\text{OCH}_3$ ,  $\bullet\text{OOCH}_3$  and  $\bullet\text{OOCH}=\text{CH}_2$  via HAT from all the available sites of **1M**. Level of theory: (SMD)-M06-2X/6-311+G(d,p)//M06-2X/6-31G(d).

|              | $\Delta G_{HAT}^0$ |                     |                       |                        |                                  | $\Delta G_{HAT,water}^0$ |                     |                       |                        |                                  | $\Delta G_{HAT,benzene}^0$ |                     |                       |                        |                                  |
|--------------|--------------------|---------------------|-----------------------|------------------------|----------------------------------|--------------------------|---------------------|-----------------------|------------------------|----------------------------------|----------------------------|---------------------|-----------------------|------------------------|----------------------------------|
|              | $\bullet\text{OH}$ | $\bullet\text{OOH}$ | $\bullet\text{OCH}_3$ | $\bullet\text{OOCH}_3$ | $\bullet\text{OOCH}=\text{CH}_2$ | $\bullet\text{OH}$       | $\bullet\text{OOH}$ | $\bullet\text{OCH}_3$ | $\bullet\text{OOCH}_3$ | $\bullet\text{OOCH}=\text{CH}_2$ | $\bullet\text{OH}$         | $\bullet\text{OOH}$ | $\bullet\text{OCH}_3$ | $\bullet\text{OOCH}_3$ | $\bullet\text{OOCH}=\text{CH}_2$ |
| <b>C1</b>    | -20.67             | 11.33               | -5.76                 | 12.92                  | 10.03                            | -22.91                   | 9.97                | -7.40                 | 11.24                  | 7.69                             | -21.04                     | 11.40               | -5.57                 | 13.27                  | 9.93                             |
| <b>C2</b>    | -18.30             | 13.69               | -3.40                 | 15.29                  | 12.40                            | -18.40                   | 14.48               | -2.90                 | 15.75                  | 12.20                            | -18.03                     | 14.42               | -2.56                 | 16.28                  | 12.95                            |
| <b>C3</b>    | -19.12             | 12.87               | -4.22                 | 14.46                  | 11.58                            | -20.81                   | 12.06               | -5.31                 | 13.33                  | 9.78                             | -19.55                     | 12.90               | -4.08                 | 14.76                  | 11.42                            |
| <b>C6</b>    | -15.78             | 16.22               | -0.87                 | 17.81                  | 14.92                            | -16.63                   | 16.25               | -1.13                 | 17.52                  | 13.97                            | -15.63                     | 16.81               | -0.16                 | 18.68                  | 15.34                            |
| <b>C7</b>    | -23.13             | 8.87                | -8.23                 | 10.46                  | 7.57                             | -27.08                   | 5.80                | -11.58                | 7.07                   | 3.52                             | -24.12                     | 8.32                | -8.65                 | 10.19                  | 6.85                             |
| <b>C8</b>    | -24.40             | 7.60                | -9.49                 | 9.19                   | 6.30                             | -26.88                   | 6.00                | -11.38                | 7.27                   | 3.71                             | -25.13                     | 7.32                | -9.66                 | 9.18                   | 5.85                             |
| <b>C8tBu</b> | -20.46             | 11.54               | -5.56                 | 13.13                  | 10.24                            | -22.74                   | 10.14               | -7.24                 | 11.41                  | 7.85                             | -20.76                     | 11.69               | -5.29                 | 13.55                  | 10.21                            |
| <b>C10</b>   | -38.50             | -6.50               | -23.60                | -4.91                  | -7.80                            | -38.99                   | -6.12               | -23.49                | -4.85                  | -8.40                            | -38.22                     | -5.77               | -22.75                | -3.91                  | -7.24                            |
| <b>C12</b>   | -19.69             | 12.31               | -4.78                 | 13.90                  | 11.01                            | -20.17                   | 12.71               | -4.67                 | 13.98                  | 10.42                            | -19.59                     | 12.85               | -4.12                 | 14.72                  | 11.38                            |
| <b>C14</b>   | -27.60             | 4.39                | -12.70                | 5.99                   | 3.10                             | -31.51                   | 1.36                | -16.01                | 2.63                   | -0.92                            | -28.24                     | 4.21                | -12.77                | 6.07                   | 2.74                             |
| <b>C14Me</b> | -16.61             | 15.39               | -1.70                 | 16.98                  | 14.09                            | -18.77                   | 14.11               | -3.27                 | 15.38                  | 11.82                            | -16.64                     | 15.81               | -1.17                 | 17.67                  | 14.34                            |
| <b>C10H</b>  | -12.03             | 19.96               | 2.87                  | 21.56                  | 18.67                            | -12.98                   | 19.89               | 2.52                  | 21.16                  | 17.61                            | -12.23                     | 20.21               | 3.24                  | 22.08                  | 18.74                            |
| <b>C7OH</b>  | -10.63             | 21.37               | 4.27                  | 22.96                  | 20.07                            | -14.11                   | 18.77               | 1.39                  | 20.04                  | 16.48                            | -11.86                     | 20.58               | 3.61                  | 22.45                  | 19.11                            |
| <b>C10OH</b> | -13.28             | 18.72               | 1.63                  | 20.31                  | 17.42                            | -14.88                   | 17.99               | 0.62                  | 19.26                  | 15.71                            | -14.01                     | 18.44               | 1.46                  | 20.30                  | 16.96                            |

**Table S6** Gibbs free reaction energies ( $\Delta G_{HAT}^o$ ) computed in gas-phase, water and benzene for the scavenging of  $\cdot\text{OH}$ ,  $\cdot\text{OOH}$ ,  $\cdot\text{OCH}_3$ ,  $\cdot\text{OOCH}_3$  and  $\cdot\text{OOCH}=\text{CH}_2$  via HAT from all the available sites of **1B**. Level of theory: (SMD)-M06-2X/6-311+G(d,p)//M06-2X/6-31G(d).

|              | $\Delta G_{HAT}^o$ |                   |                     |                      |                                | $\Delta G_{HAT,water}^o$ |                   |                     |                      |                                | $\Delta G_{HAT,benzene}^o$ |                   |                     |                      |                                |
|--------------|--------------------|-------------------|---------------------|----------------------|--------------------------------|--------------------------|-------------------|---------------------|----------------------|--------------------------------|----------------------------|-------------------|---------------------|----------------------|--------------------------------|
|              | $\cdot\text{OH}$   | $\cdot\text{OOH}$ | $\cdot\text{OCH}_3$ | $\cdot\text{OOCH}_3$ | $\cdot\text{OOCH}=\text{CH}_2$ | $\cdot\text{OH}$         | $\cdot\text{OOH}$ | $\cdot\text{OCH}_3$ | $\cdot\text{OOCH}_3$ | $\cdot\text{OOCH}=\text{CH}_2$ | $\cdot\text{OH}$           | $\cdot\text{OOH}$ | $\cdot\text{OCH}_3$ | $\cdot\text{OOCH}_3$ | $\cdot\text{OOCH}=\text{CH}_2$ |
| <b>C1</b>    | -20.16             | 11.83             | -5.26               | 13.43                | 10.54                          | -22.25                   | 10.63             | -6.75               | 11.90                | 8.35                           | -20.51                     | 11.93             | -5.05               | 13.80                | 10.46                          |
| <b>C2</b>    | -27.61             | 4.38              | -12.71              | 5.98                 | 3.09                           | -25.69                   | 7.19              | -10.19              | 8.46                 | 4.91                           | -26.71                     | 5.74              | -11.24              | 7.60                 | 4.27                           |
| <b>C6</b>    | -18.50             | 13.49             | -3.60               | 15.09                | 12.20                          | -19.36                   | 13.52             | -3.86               | 14.79                | 11.23                          | -18.56                     | 13.88             | -3.09               | 15.75                | 12.41                          |
| <b>C7</b>    | -22.30             | 9.69              | -7.40               | 11.28                | 8.40                           | -24.53                   | 8.35              | -9.03               | 9.62                 | 6.06                           | -22.77                     | 9.67              | -7.30               | 11.54                | 8.20                           |
| <b>C8</b>    | -21.88             | 10.12             | -6.98               | 11.71                | 8.82                           | -24.06                   | 8.82              | -8.56               | 10.09                | 6.54                           | -22.46                     | 9.98              | -6.99               | 11.85                | 8.51                           |
| <b>C8tBu</b> | -19.97             | 12.03             | -5.06               | 13.62                | 10.73                          | -22.71                   | 10.17             | -7.21               | 11.44                | 7.89                           | -20.41                     | 12.03             | -4.94               | 13.90                | 10.56                          |
| <b>C10</b>   | -38.92             | -6.93             | -24.02              | -5.33                | -8.22                          | -38.44                   | -5.56             | -22.94              | -4.29                | -7.85                          | -38.47                     | -6.03             | -23.00              | -4.16                | -7.50                          |
| <b>C12</b>   | -20.61             | 11.39             | -5.71               | 12.98                | 10.09                          | -19.23                   | 13.65             | -3.73               | 14.92                | 11.37                          | -19.87                     | 12.57             | -4.41               | 14.44                | 11.10                          |
| <b>C14</b>   | -19.55             | 12.45             | -4.64               | 14.04                | 11.15                          | -22.26                   | 10.61             | -6.76               | 11.88                | 8.33                           | -20.12                     | 12.32             | -4.65               | 14.19                | 10.85                          |
| <b>C14Me</b> | -18.57             | 13.42             | -3.67               | 15.01                | 12.12                          | -20.98                   | 11.90             | -5.48               | 13.16                | 9.61                           | -18.76                     | 13.69             | -3.29               | 15.55                | 12.21                          |
| <b>C10OH</b> | -7.14              | 24.85             | 7.76                | 26.45                | 23.56                          | -13.91                   | 18.96             | 1.59                | 20.23                | 16.68                          | -9.27                      | 23.17             | 6.20                | 25.04                | 21.70                          |
| <b>C3OH</b>  | -10.84             | 21.16             | 4.07                | 22.75                | 19.86                          | -15.10                   | 17.78             | 0.40                | 19.05                | 15.49                          | -12.24                     | 20.20             | 3.23                | 22.07                | 18.73                          |
| <b>C10OH</b> | -23.41             | 8.58              | -8.51               | 10.17                | 7.28                           | -21.65                   | 11.23             | -6.15               | 12.50                | 8.94                           | -23.13                     | 9.31              | -7.67               | 11.18                | 7.84                           |
| <b>C2OH</b>  | 1.13               | 33.13             | 16.03               | 34.72                | 31.83                          | -4.22                    | 28.66             | 11.28               | 29.93                | 26.37                          | 0.78                       | 33.22             | 16.25               | 35.09                | 31.75                          |

**Table S7** Gibbs free reaction energies ( $\Delta G_{HAT}^o$  kcal mol<sup>-1</sup>) computed in water of **1B** and **1B** $\cdot$  for the scavenging of  $\cdot\text{OH}$  via HAT from C1, C2, C14 and C3OH sites. Level of theory: M06-2X/6-311+G(d,p)//M06-2X/6-31G(d).

| Site | $\Delta G_{HAT}^o$ ( <b>1B</b> ) | $\Delta G_{HAT}^o$ ( <b>1B</b> $\cdot$ ) | $\Delta\Delta G_{HAT}^o$ |
|------|----------------------------------|------------------------------------------|--------------------------|
| C1   | -28.64                           | -22.25                                   | 6.39                     |
| C2   | -17.70                           | -25.69                                   | -7.99                    |
| C10  | -39.35                           | -38.44                                   | 0.91                     |
| C14  | -29.59                           | -22.26                                   | 7.33                     |
| C3OH | -12.49                           | -21.65                                   | -9.16                    |



**Table S8** Gibbs free reaction energies ( $\Delta G_{HAT}^o$  kcal mol<sup>-1</sup>) computed in gas-phase, water and benzene, for the scavenging of  $\bullet$ OH,  $\bullet$ OOH,  $\bullet$ OCH<sub>3</sub>,  $\bullet$ OOCH<sub>3</sub> and  $\bullet$ OOCH=CH<sub>2</sub> via HAT from neutral Trolox<sup>[a]</sup> (**3**, Scheme 1 in the text). For comparison the values of HAT from C10 of **1B** and **1B**<sup>-</sup> are also included. Level of theory: (SMD)-M06-2X/6-311+G(d,p)//M06-2X/6-31G(d).

|                             | $\Delta G_{HAT}^o$ |               |                            |                             |                                | $\Delta G_{HAT,water}^o$ |               |                            |                             |                                | $\Delta G_{HAT,benzene}^o$ |               |                            |                             |                                |
|-----------------------------|--------------------|---------------|----------------------------|-----------------------------|--------------------------------|--------------------------|---------------|----------------------------|-----------------------------|--------------------------------|----------------------------|---------------|----------------------------|-----------------------------|--------------------------------|
|                             | $\bullet$ OH       | $\bullet$ OOH | $\bullet$ OCH <sub>3</sub> | $\bullet$ OOCH <sub>3</sub> | $\bullet$ OOCH=CH <sub>2</sub> | $\bullet$ OH             | $\bullet$ OOH | $\bullet$ OCH <sub>3</sub> | $\bullet$ OOCH <sub>3</sub> | $\bullet$ OOCH=CH <sub>2</sub> | $\bullet$ OH               | $\bullet$ OOH | $\bullet$ OCH <sub>3</sub> | $\bullet$ OOCH <sub>3</sub> | $\bullet$ OOCH=CH <sub>2</sub> |
| <b>C1</b>                   | -28.3              | 3.3           | -13.8                      | 4.9                         | 2                              | -31.0                    | 1.5           | -15.9                      | 2.8                         | -0.8                           | -28.6                      | 3.5           | -13.5                      | 5.3                         | 2.0                            |
| <b>C2</b>                   | -27.4              | 4.2           | -12.9                      | 5.8                         | 2.9                            | -29.5                    | 2.9           | -14.4                      | 4.2                         | 0.6                            | -27.3                      | 4.7           | -12.3                      | 6.6                         | 3.3                            |
| <b>C3</b>                   | -27.7              | 3.9           | -13.2                      | 5.4                         | 2.6                            | -30.4                    | 2.1           | -15.3                      | 3.3                         | -0.2                           | -27.9                      | 4.1           | -12.9                      | 6.0                         | 2.6                            |
| <b>C4</b>                   | -16.6              | 15.0          | -2.1                       | 16.6                        | 13.7                           | -19.0                    | 13.5          | -3.9                       | 14.7                        | 11.2                           | -16.9                      | 15.2          | -1.8                       | 17.0                        | 13.7                           |
| <b>C5</b>                   | -19.4              | 12.2          | -4.9                       | 13.8                        | 10.9                           | -21.7                    | 10.7          | -6.6                       | 12.0                        | 8.5                            | -19.7                      | 12.4          | -4.6                       | 14.2                        | 10.9                           |
| <b>C6</b>                   | -31.4              | 0.2           | -16.9                      | 1.8                         | -1.2                           | -33.5                    | -1.0          | -18.4                      | 0.2                         | -3.3                           | -31.7                      | 0.3           | -16.7                      | 2.2                         | -1.2                           |
| <b>O1</b>                   | -38.7              | -7.1          | -24.2                      | -5.5                        | -8.4                           | -41.7                    | -9.3          | -26.7                      | -8.0                        | -11.6                          | -39.9                      | -7.8          | -24.8                      | -6.0                        | -9.3                           |
| <b>O2</b>                   | -6.6               | 25.0          | 8.0                        | 26.6                        | 23.7                           | -5.6                     | 26.9          | 9.5                        | 28.2                        | 24.6                           | -7.2                       | 24.9          | 7.9                        | 26.7                        | 23.4                           |
| <b>1B - C10</b>             | -34.4              | -2.4          | -19.5                      | -0.8                        | -3.7                           | -39.4                    | -6.5          | -23.9                      | -5.2                        | -8.8                           | -35.9                      | -3.5          | -20.5                      | -1.6                        | -5.0                           |
| <b>1B<sup>-</sup> - C10</b> | -38.9              | -6.9          | -24.0                      | -5.3                        | -8.2                           | -38.4                    | -5.6          | -22.9                      | -4.3                        | -7.9                           | -38.5                      | -6.0          | -23.0                      | -4.2                        | -7.5                           |

[a] Bortoli, M.; Dalla Tiezza, M.; Muraro, C.; Pavan, C.; Ribaudo, G.; Rodighiero, A.; Tubaro, C.; Zagotto, G.; Orian, L. Psychiatric Disorders and Oxidative Injury: Antioxidant Effects of Zolpidem Therapy Disclosed In Silico. *Computational and Structural Biotechnology Journal* **2019**, 17, 311–318, doi:10.1016/j.csbj.2019.02.004.

**Table S9** Gibbs free reaction energies ( $\Delta G_{HAT}^o$  kcal mol<sup>-1</sup>) computed in gas-phase, water and benzene, for the scavenging of  $\bullet$ OH,  $\bullet$ OOH,  $\bullet$ OCH<sub>3</sub>,  $\bullet$ OOCH<sub>3</sub> and  $\bullet$ OOCH=CH<sub>2</sub> via HAT from C4 site of melatonin<sup>[a]</sup> (**4**, Scheme 1 in the text). Two lowest energy conformers of melatonin have been considered<sup>[b]</sup>. For comparison the values of HAT from C10 of **1B** and **1B**<sup>-</sup> are also included. Level of theory: (SMD)-M06-2X/6-311+G(d,p)//M06-2X/6-31G(d).

|                             | $\Delta G_{HAT}^o$ |               |                            |                             |                                | $\Delta G_{HAT,water}^o$ |               |                            |                             |                                | $\Delta G_{HAT,benzene}^o$ |               |                            |                             |                                |
|-----------------------------|--------------------|---------------|----------------------------|-----------------------------|--------------------------------|--------------------------|---------------|----------------------------|-----------------------------|--------------------------------|----------------------------|---------------|----------------------------|-----------------------------|--------------------------------|
|                             | $\bullet$ OH       | $\bullet$ OOH | $\bullet$ OCH <sub>3</sub> | $\bullet$ OOCH <sub>3</sub> | $\bullet$ OOCH=CH <sub>2</sub> | $\bullet$ OH             | $\bullet$ OOH | $\bullet$ OCH <sub>3</sub> | $\bullet$ OOCH <sub>3</sub> | $\bullet$ OOCH=CH <sub>2</sub> | $\bullet$ OH               | $\bullet$ OOH | $\bullet$ OCH <sub>3</sub> | $\bullet$ OOCH <sub>3</sub> | $\bullet$ OOCH=CH <sub>2</sub> |
| <b>C1</b>                   | -28.9              | 2.8           | -14.3                      | 4.3                         | 1.5                            | -33.8                    | -1.3          | -18.7                      | -0.1                        | -3.6                           | -31.3                      | 0.8           | -16.2                      | 2.7                         | -0.7                           |
| <b>C2</b>                   | -28.6              | 3.0           | -14.1                      | 4.5                         | 1.7                            | -31.0                    | 1.4           | -16.0                      | 2.7                         | -0.9                           | -29.1                      | 3.0           | -14.0                      | 4.9                         | 1.5                            |
| <b>1B - C10</b>             | -34.4              | -2.4          | -19.5                      | -0.8                        | -3.7                           | -39.4                    | -6.5          | -23.9                      | -5.2                        | -8.8                           | -35.9                      | -3.5          | -20.5                      | -1.6                        | -5.0                           |
| <b>1B<sup>-</sup> - C10</b> | -38.9              | -6.9          | -24.0                      | -5.3                        | -8.2                           | -38.4                    | -5.6          | -22.9                      | -4.3                        | -7.9                           | -38.5                      | -6.0          | -23.0                      | -4.2                        | -7.5                           |

[a] Bortoli, M.; Dalla Tiezza, M.; Muraro, C.; Pavan, C.; Ribaudo, G.; Rodighiero, A.; Tubaro, C.; Zagotto, G.; Orian, L. Psychiatric Disorders and Oxidative Injury: Antioxidant Effects of Zolpidem Therapy Disclosed In Silico. *Computational and Structural Biotechnology Journal* **2019**, 17, 311–318, doi:10.1016/j.csbj.2019.02.004 [b] Fogueri, U.R.; Kozuch, S.; Karton, A.; Martin, J.M.L. The Melatonin Conformer Space: Benchmark and Assessment of Wave Function and DFT Methods for a Paradigmatic Biological and Pharmacological Molecule. *J Phys Chem A* **2013**, 117, 2269–2277, doi:10.1021/jp312644t.

**Figure S5** Gibbs free reaction energies ( $\Delta G_{HAT}^0$ ) computed in (a) gas-phase, (b) water and (c) benzene for the scavenging of  $\cdot\text{OH}$ ,  $\cdot\text{OOH}$ ,  $\cdot\text{OCH}_3$ ,  $\cdot\text{OOCH}_3$  and  $\cdot\text{OOCH}=\text{CH}_2$  via HAT from all the available sites of **2**. Level of theory: (SMD)-M06-2X/6-311+G(d,p)//M06-2X/6-31G(d).

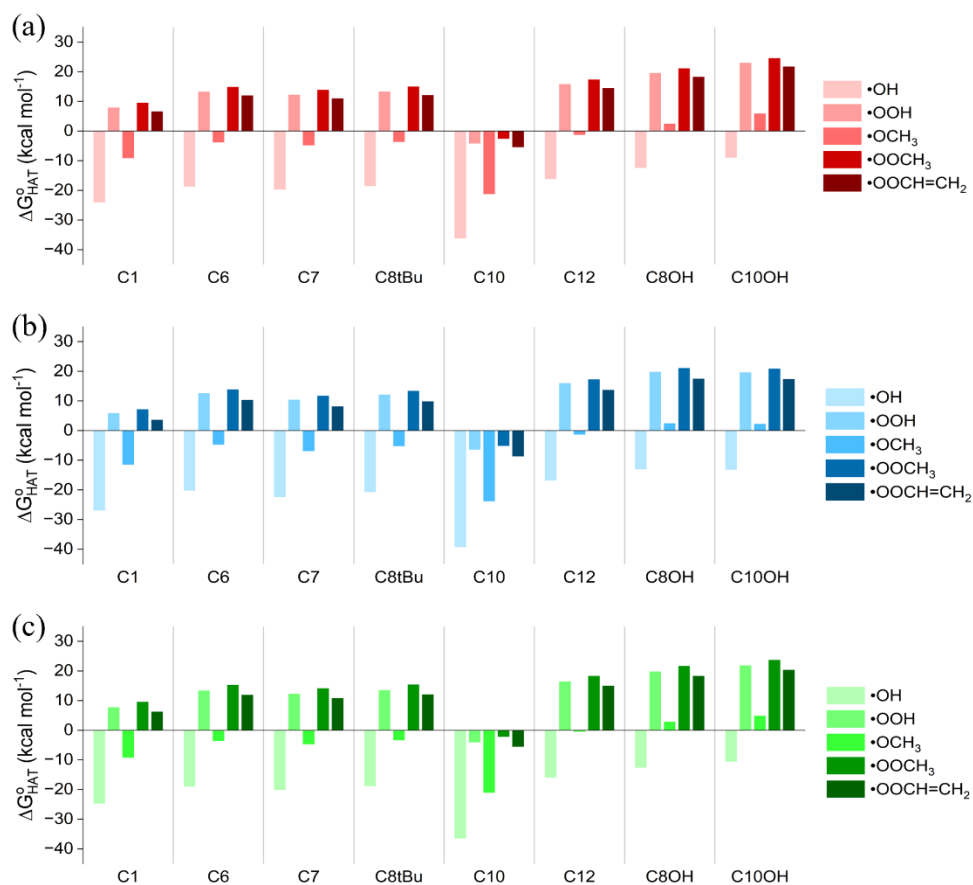

**Table S10** Gibbs free reaction energies ( $\Delta G_{HAT}^0$ ) computed in gas-phase, water and benzene for the scavenging of  $\cdot\text{OH}$ ,  $\cdot\text{OOH}$ ,  $\cdot\text{OCH}_3$ ,  $\cdot\text{OOCH}_3$  and  $\cdot\text{OOCH}=\text{CH}_2$  via HAT from all the available sites of **2**. Level of theory: (SMD)-M06-2X/6-311+G(d,p)//M06-2X/6-31G(d).

|       | $\Delta G_{HAT}^0$ |                   |                     |                      |                                | $\Delta G_{HAT,water}^0$ |                   |                     |                      |                                | $\Delta G_{HAT,benzene}^0$ |                   |                     |                      |                                |
|-------|--------------------|-------------------|---------------------|----------------------|--------------------------------|--------------------------|-------------------|---------------------|----------------------|--------------------------------|----------------------------|-------------------|---------------------|----------------------|--------------------------------|
|       | $\cdot\text{OH}$   | $\cdot\text{OOH}$ | $\cdot\text{OCH}_3$ | $\cdot\text{OOCH}_3$ | $\cdot\text{OOCH}=\text{CH}_2$ | $\cdot\text{OH}$         | $\cdot\text{OOH}$ | $\cdot\text{OCH}_3$ | $\cdot\text{OOCH}_3$ | $\cdot\text{OOCH}=\text{CH}_2$ | $\cdot\text{OH}$           | $\cdot\text{OOH}$ | $\cdot\text{OCH}_3$ | $\cdot\text{OOCH}_3$ | $\cdot\text{OOCH}=\text{CH}_2$ |
| C1    | -24.07             | 7.92              | -9.17               | 9.51                 | 6.62                           | -26.98                   | 5.90              | -11.48              | 7.17                 | 3.61                           | -24.71                     | 7.74              | -9.24               | 9.60                 | 6.26                           |
| C6    | -18.70             | 13.29             | -3.80               | 14.88                | 11.99                          | -20.25                   | 12.62             | -4.75               | 13.89                | 10.34                          | -19.04                     | 13.40             | -3.57               | 15.27                | 11.93                          |
| C7    | -19.72             | 12.28             | -4.81               | 13.87                | 10.98                          | -22.44                   | 10.44             | -6.94               | 11.71                | 8.15                           | -20.17                     | 12.28             | -4.70               | 14.14                | 10.80                          |
| C8tBu | -18.58             | 13.41             | -3.68               | 15.01                | 12.12                          | -20.76                   | 12.11             | -5.26               | 13.38                | 9.83                           | -18.87                     | 13.58             | -3.40               | 15.44                | 12.10                          |
| C10   | -36.17             | -4.18             | -21.27              | -2.58                | -5.47                          | -39.33                   | -6.45             | -23.83              | -5.18                | -8.73                          | -36.52                     | -4.08             | -21.05              | -2.21                | -5.55                          |
| C12   | -16.20             | 15.80             | -1.29               | 17.39                | 14.50                          | -16.88                   | 16.00             | -1.38               | 17.27                | 13.71                          | -15.95                     | 16.50             | -0.48               | 18.36                | 15.03                          |
| C8OH  | -12.42             | 19.57             | 2.48                | 21.16                | 18.27                          | -13.06                   | 19.81             | 2.44                | 21.08                | 17.53                          | -12.61                     | 19.83             | 2.86                | 21.70                | 18.36                          |
| C10OH | -8.98              | 23.02             | 5.92                | 24.61                | 21.72                          | -13.25                   | 19.62             | 2.25                | 20.89                | 17.34                          | -10.58                     | 21.86             | 4.89                | 23.73                | 20.39                          |

**Table S11** Coordinates of the structures of **1A-M**, **1B**, **2** and their radicals at each available site. Level of theory: M06-2X/6-31G(d).

|           |           |           |           |           |           |           |           |
|-----------|-----------|-----------|-----------|-----------|-----------|-----------|-----------|
| <b>1A</b> |           |           |           | C         | -2.790650 | -3.732779 | -2.270274 |
| C         | 0.092454  | -0.044483 | 0.011545  | C         | -4.185626 | -3.631821 | -1.634514 |
| C         | 0.359148  | 1.432661  | -0.300989 | C         | -1.978108 | -4.864837 | -1.620610 |
| C         | -0.956837 | 1.980947  | -0.892187 | C         | -3.003171 | -4.101823 | -3.749051 |
| C         | -1.628099 | 0.751205  | -1.548557 | O         | -0.524694 | 2.957045  | -1.773545 |
| C         | -0.849352 | -0.499056 | -1.116728 | O         | -0.449183 | -2.846995 | 0.626800  |
| C         | -0.120983 | -0.945706 | -2.410626 | O         | -1.716002 | -1.203162 | 2.562670  |
| C         | -0.576530 | -2.373641 | -2.648291 | O         | -3.008673 | -0.424410 | 0.878161  |
| C         | -2.048890 | -2.353941 | -2.207816 | O         | -2.971912 | 0.528215  | -1.244933 |
| C         | -1.975215 | -1.560299 | -0.871827 | O         | -0.634784 | -0.104710 | -3.540894 |
| C         | -1.838113 | -2.325932 | 0.437781  | O         | -2.035016 | 1.631864  | -3.793979 |
| C         | -2.344396 | -1.318178 | 1.456658  | O         | -0.767633 | 3.525387  | 2.318085  |
| C         | -3.186292 | -0.647157 | -0.578528 | O         | 0.416470  | 2.055508  | 1.107078  |
| C         | -1.487383 | 0.809459  | -3.071237 | H         | 1.202737  | 1.686442  | -0.736863 |
| C         | -1.655110 | 2.523401  | 0.358961  | H         | 0.955164  | -0.851931 | -2.487971 |
| C         | -0.473961 | 2.899959  | 1.247155  | H         | -0.505568 | -2.676235 | -3.781162 |
| C         | -2.621524 | 3.675810  | 0.141868  | H         | -0.006997 | -3.055345 | -2.111694 |
| C         | -2.771157 | -3.724038 | -2.277555 | H         | -2.630855 | -1.702409 | -2.899993 |
| C         | -4.188764 | -3.633876 | -1.690918 | H         | -2.488422 | -3.123646 | 0.506118  |
| C         | -1.970802 | -4.855594 | -1.610089 | H         | -4.117949 | -1.043155 | -0.741946 |
| C         | -2.934583 | -4.088809 | -3.763977 | H         | -2.390961 | 1.756356  | 0.728901  |
| O         | -0.626897 | 2.994609  | -1.808005 | H         | -3.400167 | 3.517320  | -0.698603 |
| O         | -0.549266 | -2.783252 | 0.724149  | H         | -1.986779 | 4.568237  | -0.420223 |
| O         | -2.045388 | -1.286979 | 2.616588  | H         | -3.049516 | 4.141823  | 0.928507  |
| O         | -3.183955 | -0.451182 | 0.855804  | H         | -4.162380 | -3.439691 | -0.557112 |
| O         | -3.001337 | 0.565498  | -1.223877 | H         | -4.727823 | -4.571938 | -1.779223 |
| O         | -0.596688 | -0.109926 | -3.482673 | H         | -4.773644 | -2.837390 | -2.109664 |
| O         | -2.070217 | 1.554058  | -3.806276 | H         | -1.637541 | -4.641674 | -0.606447 |
| O         | -0.461638 | 3.663211  | 2.165393  | H         | -1.088242 | -5.093974 | -2.215866 |
| O         | 0.635123  | 2.202583  | 0.861149  | H         | -2.586112 | -5.774973 | -1.582100 |
| H         | -0.379592 | -0.095128 | 0.997253  | H         | -3.597707 | -3.341231 | -4.267067 |
| H         | 1.181780  | 1.579064  | -1.007122 | H         | -3.536625 | -5.055342 | -3.823238 |
| H         | 0.963799  | -0.822613 | -2.364108 | H         | -2.053579 | -4.213759 | -4.280570 |
| H         | -0.421692 | -2.678087 | -3.685799 | H         | -0.285791 | -2.794417 | 1.586145  |
| H         | 0.000252  | -3.034160 | -1.989926 | H         | -1.274181 | 3.209862  | -2.338931 |
| H         | -2.589616 | -1.697494 | -2.910009 | H         | 0.755339  | -0.725664 | 0.464786  |
| H         | -2.558805 | -3.155925 | 0.456237  | <b>C2</b> |           |           |           |
| H         | -4.169983 | -1.029532 | -0.852543 | C         | 0.179493  | -0.136418 | 0.028012  |
| H         | -2.174524 | 1.702048  | 0.870680  | C         | 0.081899  | 1.354989  | 0.095199  |
| H         | -3.482967 | 3.344354  | -0.444817 | C         | -0.991629 | 1.958886  | -0.765310 |
| H         | -2.124985 | 4.499509  | -0.376190 | C         | -1.634257 | 0.727117  | -1.456914 |
| H         | -2.971570 | 4.044284  | 1.108288  | C         | -0.814597 | -0.529980 | -1.097500 |
| H         | -4.210097 | -3.437006 | -0.614375 | C         | -0.157477 | -0.934111 | -2.442145 |
| H         | -4.716649 | -4.579382 | -1.852466 | C         | -0.611763 | -2.359316 | -2.697235 |
| H         | -4.766087 | -2.847118 | -2.191176 | C         | -2.061808 | -2.361033 | -2.187530 |
| H         | -1.639545 | -4.629241 | -0.593394 | C         | -1.924898 | -1.611868 | -0.831554 |
| H         | -1.074558 | -5.089457 | -2.193875 | C         | -1.736295 | -2.419774 | 0.444440  |
| H         | -2.581158 | -5.764208 | -1.574212 | C         | -2.155007 | -1.426729 | 1.519193  |
| H         | -3.524053 | -3.333957 | -4.295865 | C         | -3.115796 | -0.713651 | -0.445291 |
| H         | -3.452433 | -5.049202 | -3.858044 | C         | -1.543066 | 0.848605  | -2.978301 |
| H         | -1.968374 | -4.184959 | -4.267847 | C         | -1.845856 | 2.699830  | 0.273628  |
| H         | -0.449925 | -2.751738 | 1.692775  | C         | -0.841411 | 2.946925  | 1.392595  |
| H         | -1.409436 | 3.203660  | -2.345334 | C         | -2.545605 | 3.963330  | -0.195824 |
| H         | 1.000267  | -0.648413 | 0.065788  | C         | -2.787888 | -3.728326 | -2.273496 |
| <b>C1</b> |           |           |           | C         | -4.183452 | -3.655736 | -1.634153 |
| C         | 0.100508  | -0.062292 | -0.082371 | C         | -1.969860 | -4.882476 | -1.670923 |
| C         | 0.308029  | 1.414060  | -0.160158 | C         | -3.004490 | -4.044520 | -3.764378 |
| C         | -0.952538 | 1.975256  | -0.863354 | O         | -0.388264 | 2.830872  | -1.700625 |
| C         | -1.601680 | 0.746322  | -1.567174 | O         | -0.452086 | -2.933304 | 0.642043  |
| C         | -0.815364 | -0.513586 | -1.172321 | O         | -1.804708 | -1.447430 | 2.664707  |
| C         | -0.131076 | -0.963400 | -2.501825 | O         | -2.988004 | -0.510141 | 0.984030  |
| C         | -0.610671 | -2.384147 | -2.733786 | O         | -2.994015 | 0.493360  | -1.106833 |
| C         | -2.061567 | -2.365486 | -2.227194 | O         | -0.703814 | -0.078559 | -3.464360 |
| C         | -1.930790 | -1.582468 | -0.893098 | O         | -2.126769 | 1.646873  | -3.655992 |
| C         | -1.730597 | -2.331123 | 0.416718  | O         | -0.863324 | 3.763637  | 2.257856  |
| C         | -2.114188 | -1.271386 | 1.436609  | O         | 0.169603  | 2.001386  | 1.298813  |
| C         | -3.116366 | -0.660072 | -0.544592 | H         | -0.065019 | -0.557867 | 1.005822  |
| C         | -1.475316 | 0.842768  | -3.087558 | H         | 0.925273  | -0.793837 | -2.454314 |
| C         | -1.755686 | 2.545361  | 0.310731  | H         | -0.505426 | -2.633471 | -3.749163 |
| C         | -0.692044 | 2.806221  | 1.367519  | H         | -0.000188 | -3.033442 | -2.085796 |
| C         | -2.601086 | 3.771006  | 0.004637  | H         | -2.634556 | -1.681773 | -2.840408 |

|   |           |           |           |
|---|-----------|-----------|-----------|
| H | -2.485548 | -3.224440 | 0.476765  |
| H | -4.115787 | -1.105011 | -0.635871 |
| H | -2.574834 | 1.991044  | 0.688095  |
| H | -3.279780 | 3.723118  | -0.971152 |
| H | -1.822428 | 4.678302  | -0.595091 |
| H | -3.062425 | 4.434696  | 0.642732  |
| H | -4.164183 | -3.508025 | -0.549749 |
| H | -4.723571 | -4.590226 | -1.817956 |
| H | -4.772489 | -2.843969 | -2.077725 |
| H | -1.624213 | -4.699171 | -0.650615 |
| H | -1.082017 | -5.084825 | -2.278809 |
| H | -2.575093 | -5.795302 | -1.665866 |
| H | -3.604474 | -3.268460 | -4.252212 |
| H | -3.533999 | -4.997213 | -3.870768 |
| H | -2.056711 | -4.132748 | -4.303312 |
| H | -0.312417 | -2.978277 | 1.605004  |
| H | -1.080744 | 3.157231  | -2.301438 |
| H | 1.187394  | -0.501186 | -0.202390 |

# C6

|   |           |           |           |
|---|-----------|-----------|-----------|
| C | 0.113670  | -0.056681 | -0.059143 |
| C | 0.372098  | 1.428181  | -0.336467 |
| C | -0.955735 | 1.995525  | -0.882281 |
| C | -1.627533 | 0.791050  | -1.581106 |
| C | -0.868790 | -0.479606 | -1.168683 |
| C | -0.229642 | -0.939901 | -2.467606 |
| C | -0.582200 | -2.374632 | -2.693518 |
| C | -2.061644 | -2.375496 | -2.223880 |
| C | -2.001007 | -1.538769 | -0.907591 |
| C | -1.882028 | -2.271577 | 0.422985  |
| C | -2.393854 | -1.236275 | 1.408545  |
| C | -3.213228 | -0.612293 | -0.651734 |
| C | -1.448354 | 0.884880  | -3.100914 |
| C | -1.633730 | 2.484765  | 0.401259  |
| C | -0.435097 | 2.839206  | 1.276405  |
| C | -2.612502 | 3.637223  | 0.248582  |
| C | -2.762839 | -3.757285 | -2.254509 |
| C | -4.190498 | -3.660000 | -1.692566 |
| C | -1.958800 | -4.854784 | -1.537644 |
| C | -2.900248 | -4.176139 | -3.729319 |
| O | -0.639736 | 3.050406  | -1.755334 |
| O | -0.602989 | -2.737302 | 0.732883  |
| O | -2.097815 | -1.161843 | 2.567001  |
| O | -3.242847 | -0.398955 | 0.777728  |
| O | -3.010464 | 0.597176  | -1.303924 |
| O | -0.606334 | -0.102719 | -3.514111 |
| O | -1.958195 | 1.669044  | -3.842713 |
| O | -0.409498 | 3.571237  | 2.219551  |
| O | 0.669582  | 2.165414  | 0.842152  |
| H | -0.327166 | -0.139559 | 0.938775  |
| H | 1.180385  | 1.592324  | -1.054473 |
| H | -0.446810 | -2.680561 | -3.732092 |
| H | 0.018612  | -3.014843 | -2.037846 |
| H | -2.612878 | -1.745828 | -2.942705 |
| H | -2.612359 | -3.092832 | 0.453322  |
| H | -4.192743 | -0.990845 | -0.946285 |
| H | -2.137076 | 1.643573  | 0.895513  |
| H | -3.485381 | 3.322020  | -0.330092 |
| H | -2.133341 | 4.484292  | -0.247813 |
| H | -2.942676 | 3.966305  | 1.235957  |
| H | -4.231640 | -3.418966 | -0.625776 |
| H | -4.705466 | -4.617366 | -1.823213 |
| H | -4.768272 | -2.900833 | -2.233501 |
| H | -1.660314 | -4.599082 | -0.518219 |
| H | -1.042442 | -5.083802 | -2.091346 |
| H | -2.552001 | -5.774560 | -1.497475 |
| H | -3.478348 | -3.440710 | -4.299730 |
| H | -3.418700 | -5.138326 | -3.797126 |
| H | -1.925237 | -4.293480 | -4.211212 |
| H | -0.505342 | -2.669985 | 1.699829  |
| H | -1.431771 | 3.295083  | -2.261769 |
| H | 1.020815  | -0.662604 | -0.061847 |

# C7

|   |           |           |           |
|---|-----------|-----------|-----------|
| C | 0.076894  | -0.055556 | 0.045735  |
| C | 0.367112  | 1.416118  | -0.269316 |
| C | -0.936059 | 1.978197  | -0.873443 |

|   |           |           |           |
|---|-----------|-----------|-----------|
| C | -1.608439 | 0.755934  | -1.545693 |
| C | -0.854813 | -0.504804 | -1.093906 |
| C | -0.106332 | -0.972174 | -2.370399 |
| C | -0.682500 | -2.302802 | -2.680962 |
| C | -2.091777 | -2.353581 | -2.182972 |
| C | -2.000850 | -1.543322 | -0.851967 |
| C | -1.893223 | -2.291469 | 0.470175  |
| C | -2.409459 | -1.263333 | 1.464496  |
| C | -3.204917 | -0.611541 | -0.594205 |
| C | -1.411770 | 0.826886  | -3.061302 |
| C | -1.643735 | 2.523371  | 0.371318  |
| C | -0.467590 | 2.890287  | 1.270791  |
| C | -2.598659 | 3.684050  | 0.146981  |
| C | -2.757375 | -3.754207 | -2.229449 |
| C | -4.181346 | -3.707413 | -1.655580 |
| C | -1.906925 | -4.828181 | -1.534120 |
| C | -2.891508 | -4.149205 | -3.710853 |
| O | -0.585843 | 2.994609  | -1.778565 |
| O | -0.615516 | -2.756138 | 0.785188  |
| O | -2.133777 | -1.217320 | 2.629418  |
| O | -3.230647 | -0.397316 | 0.835543  |
| O | -2.991147 | 0.587984  | -1.255386 |
| O | -0.460225 | -0.044150 | -3.438203 |
| O | -1.989168 | 1.559652  | -3.812915 |
| O | -0.458388 | 3.652808  | 2.189658  |
| O | 0.640027  | 2.185740  | 0.893909  |
| H | -0.410700 | -0.093601 | 1.024262  |
| H | 1.198442  | 1.550046  | -0.967707 |
| H | 0.981826  | -0.941622 | -2.284780 |
| H | -0.276905 | -2.945737 | -3.451252 |
| H | -2.705891 | -1.720222 | -2.858843 |
| H | -2.623530 | -3.112565 | 0.489655  |
| H | -4.186393 | -0.989551 | -0.885473 |
| H | -2.175037 | 1.706538  | 0.877493  |
| H | -3.456534 | 3.361100  | -0.449573 |
| H | -2.090256 | 4.505556  | -0.363004 |
| H | -2.955894 | 4.052528  | 1.110765  |
| H | -4.221417 | -3.471291 | -0.587876 |
| H | -4.664835 | -4.681095 | -1.785262 |
| H | -4.788784 | -2.965682 | -2.188125 |
| H | -1.699349 | -4.619937 | -0.482500 |
| H | -0.938390 | -4.932262 | -2.034010 |
| H | -2.418017 | -5.795044 | -1.593992 |
| H | -3.487211 | -3.415493 | -4.265044 |
| H | -3.389856 | -5.120640 | -3.793526 |
| H | -1.917743 | -4.236706 | -4.201791 |
| H | -0.532950 | -2.709996 | 1.754726  |
| H | -1.361595 | 3.220012  | -2.318972 |
| H | 0.974067  | -0.672724 | 0.117463  |

# C8

|   |           |           |           |
|---|-----------|-----------|-----------|
| C | 0.119174  | -0.010323 | 0.038453  |
| C | 0.342852  | 1.461963  | -0.327569 |
| C | -0.992331 | 1.953204  | -0.926786 |
| C | -1.639671 | 0.683250  | -1.528446 |
| C | -0.815588 | -0.527019 | -1.067051 |
| C | -0.085321 | -0.981394 | -2.358787 |
| C | -0.488534 | -2.431828 | -2.570098 |
| C | -1.879518 | -2.503154 | -2.001285 |
| C | -1.903693 | -1.614094 | -0.780120 |
| C | -1.750564 | -2.343085 | 0.560499  |
| C | -2.278254 | -1.320641 | 1.549512  |
| C | -3.148835 | -0.727043 | -0.506441 |
| C | -1.530737 | 0.690131  | -3.053370 |
| C | -1.693959 | 2.523974  | 0.309875  |
| C | -0.516441 | 2.962814  | 1.173552  |
| C | -2.692015 | 3.641933  | 0.058843  |
| C | -2.769775 | -3.692195 | -2.287092 |
| C | -4.181437 | -3.549958 | -1.701302 |
| C | -2.109106 | -4.972024 | -1.727813 |
| C | -2.919954 | -3.850671 | -3.812309 |
| O | -0.697668 | 2.938290  | -1.884788 |
| O | -0.450504 | -2.761729 | 0.843364  |
| O | -1.968609 | -1.239065 | 2.704525  |
| O | -3.140269 | -0.495075 | 0.924858  |
| O | -2.999762 | 0.475960  | -1.172420 |
| O | -0.600042 | -0.195212 | -3.447023 |

|   |           |           |           |
|---|-----------|-----------|-----------|
| O | -2.158586 | 1.382259  | -3.802361 |
| O | -0.516502 | 3.759727  | 2.062839  |
| O | 0.607126  | 2.279733  | 0.804121  |
| H | -0.348043 | -0.040528 | 1.027603  |
| H | 1.155690  | 1.605128  | -1.045649 |
| H | 0.994614  | -0.818488 | -2.325389 |
| H | -0.408865 | -2.713781 | -3.623038 |
| H | 0.194445  | -3.077527 | -1.992744 |
| H | -2.451226 | -3.192951 | 0.583020  |
| H | -4.123707 | -1.137913 | -0.758785 |
| H | -2.187772 | 1.708326  | 0.855332  |
| H | -3.548573 | 3.266507  | -0.508200 |
| H | -2.221335 | 4.458687  | -0.493299 |
| H | -3.044641 | 4.036686  | 1.013877  |
| H | -4.185501 | -3.435108 | -0.611904 |
| H | -4.760919 | -4.449796 | -1.930172 |
| H | -4.708337 | -2.698290 | -2.144544 |
| H | -1.953839 | -4.917958 | -0.645227 |
| H | -1.134356 | -5.143971 | -2.195372 |
| H | -2.741045 | -5.841696 | -1.939127 |
| H | -3.311273 | -2.933031 | -4.263213 |
| H | -3.614166 | -4.668138 | -4.033662 |
| H | -1.966587 | -4.088991 | -4.291957 |
| H | -0.334270 | -2.684398 | 1.807328  |
| H | -1.492498 | 3.109422  | -2.417567 |
| H | 1.043742  | -0.586775 | 0.108134  |

# C8tBu

|   |           |           |           |
|---|-----------|-----------|-----------|
| C | 0.094105  | -0.039080 | 0.011974  |
| C | 0.378742  | 1.437685  | -0.285890 |
| C | -0.924715 | 2.004057  | -0.888387 |
| C | -1.602213 | 0.786501  | -1.560505 |
| C | -0.841848 | -0.475660 | -1.127544 |
| C | -0.111397 | -0.925300 | -2.420430 |
| C | -0.573855 | -2.350501 | -2.661896 |
| C | -2.044668 | -2.329216 | -2.218601 |
| C | -1.979124 | -1.522638 | -0.892105 |
| C | -1.885077 | -2.296097 | 0.416367  |
| C | -2.395649 | -1.286620 | 1.429022  |
| C | -3.187643 | -0.599861 | -0.617708 |
| C | -1.448344 | 0.851728  | -3.081428 |
| C | -1.631380 | 2.546091  | 0.358156  |
| C | -0.456743 | 2.903489  | 1.262601  |
| C | -2.582347 | 3.710609  | 0.137539  |
| C | -2.752199 | -3.714085 | -2.228316 |
| C | -4.088103 | -3.626368 | -1.546710 |
| C | -1.887656 | -4.824936 | -1.607370 |
| C | -3.015475 | -4.095816 | -3.704299 |
| O | -0.572920 | 3.019714  | -1.793943 |
| O | -0.611741 | -2.776183 | 0.735748  |
| O | -2.115599 | -1.262325 | 2.594138  |
| O | -3.209321 | -0.404580 | 0.815787  |
| O | -2.981550 | 0.613528  | -1.255650 |
| O | -0.576155 | -0.085150 | -3.493096 |
| O | -2.011484 | 1.611512  | -3.816220 |
| O | -0.446662 | 3.660523  | 2.186026  |
| O | 0.648993  | 2.196237  | 0.885038  |
| H | -0.389861 | -0.094215 | 0.991825  |
| H | 1.210867  | 1.581224  | -0.981435 |
| H | 0.974244  | -0.810609 | -2.368982 |
| H | -0.420425 | -2.656805 | -3.699515 |
| H | 0.001787  | -3.011811 | -2.003736 |
| H | -2.596906 | -1.695923 | -2.932201 |
| H | -2.630265 | -3.107932 | 0.398075  |
| H | -4.167283 | -0.979020 | -0.908423 |
| H | -2.165971 | 1.727226  | 0.858116  |
| H | -3.440446 | 3.392584  | -0.461348 |
| H | -2.070703 | 4.532179  | -0.369108 |
| H | -2.939650 | 4.076534  | 1.102271  |
| H | -4.459069 | -4.461882 | -0.962516 |
| H | -4.830536 | -2.932933 | -1.932044 |
| H | -1.493724 | -4.574785 | -0.618656 |
| H | -1.032061 | -5.050764 | -2.251305 |
| H | -2.479592 | -5.741910 | -1.520911 |
| H | -3.664156 | -3.361478 | -4.192496 |
| H | -3.506882 | -5.072240 | -3.756198 |
| H | -2.079745 | -4.158675 | -4.270107 |

|   |           |           |           |
|---|-----------|-----------|-----------|
| H | -0.535315 | -2.738588 | 1.706340  |
| H | -1.347334 | 3.241505  | -2.337882 |
| H | 0.995102  | -0.652905 | 0.071218  |

# C10

|   |           |           |           |
|---|-----------|-----------|-----------|
| C | 0.125848  | -0.040088 | -0.076099 |
| C | 0.397345  | 1.446824  | -0.333464 |
| C | -0.921886 | 2.017498  | -0.899927 |
| C | -1.610425 | 0.812076  | -1.582396 |
| C | -0.826354 | -0.447383 | -1.207716 |
| C | -0.146256 | -0.884249 | -2.526573 |
| C | -0.574050 | -2.327628 | -2.738311 |
| C | -2.025661 | -2.352819 | -2.237881 |
| C | -1.947352 | -1.513923 | -0.927112 |
| C | -1.790382 | -2.149350 | 0.397492  |
| C | -2.558448 | -1.434858 | 1.389688  |
| C | -3.193708 | -0.623488 | -0.663353 |
| C | -1.512928 | 0.899860  | -3.108548 |
| C | -1.612149 | 2.518369  | 0.373149  |
| C | -0.428073 | 2.855810  | 1.272304  |
| C | -2.574543 | 3.681589  | 0.201000  |
| C | -2.723117 | -3.736814 | -2.228437 |
| C | -4.105552 | -3.636929 | -1.570650 |
| C | -1.907236 | -4.825490 | -1.519767 |
| C | -2.923569 | -4.166451 | -3.691100 |
| O | -0.595139 | 3.054866  | -1.788500 |
| O | -0.752156 | -2.896349 | 0.776491  |
| O | -2.485104 | -1.580596 | 2.588257  |
| O | -3.353479 | -0.521544 | 0.759852  |
| O | -2.973345 | 0.629762  | -1.226519 |
| O | -0.687633 | -0.058183 | -3.572761 |
| O | -2.084699 | 1.684699  | -3.808746 |
| O | -0.409303 | 3.581376  | 2.220135  |
| O | 0.678710  | 2.170243  | 0.855750  |
| H | -0.359529 | -0.126772 | 0.903091  |
| H | 1.217960  | 1.616785  | -1.036361 |
| H | 0.937327  | -0.737701 | -2.526427 |
| H | -0.456187 | -2.634911 | -3.780097 |
| H | 0.054709  | -2.967909 | -2.107599 |
| H | -2.611453 | -1.728865 | -2.933304 |
| H | -4.130977 | -1.010398 | -1.064209 |
| H | -2.136900 | 1.679921  | 0.852458  |
| H | -3.439065 | 3.373780  | -0.393751 |
| H | -2.076233 | 4.521104  | -0.289295 |
| H | -2.920142 | 4.016434  | 1.181103  |
| H | -4.038263 | -3.353666 | -0.513575 |
| H | -4.610783 | -4.607158 | -1.616487 |
| H | -4.743042 | -2.910674 | -2.088716 |
| H | -1.741962 | -4.608547 | -0.462809 |
| H | -0.931570 | -4.971766 | -1.994405 |
| H | -2.446359 | -5.776617 | -1.585540 |
| H | -3.500545 | -3.421607 | -4.250373 |
| H | -3.469355 | -5.114820 | -3.731119 |
| H | -1.968132 | -4.314266 | -4.204333 |
| H | -0.797882 | -2.959157 | 1.753104  |
| H | -1.381474 | 3.282192  | -2.312838 |
| H | 1.032704  | -0.649634 | -0.040198 |

# C12

|   |           |           |           |
|---|-----------|-----------|-----------|
| C | 0.111700  | -0.026784 | 0.021521  |
| C | 0.359833  | 1.450665  | -0.301425 |
| C | -0.958702 | 1.973785  | -0.910661 |
| C | -1.607909 | 0.726723  | -1.556980 |
| C | -0.802814 | -0.507073 | -1.114587 |
| C | -0.078043 | -0.957030 | -2.408629 |
| C | -0.539023 | -2.386558 | -2.642802 |
| C | -2.007719 | -2.353100 | -2.194906 |
| C | -1.918499 | -1.578904 | -0.849208 |
| C | -1.788011 | -2.357585 | 0.455291  |
| C | -2.391084 | -1.406007 | 1.478887  |
| C | -3.090866 | -0.668331 | -0.542303 |
| C | -1.480369 | 0.771506  | -3.077833 |
| C | -1.675566 | 2.519629  | 0.329451  |
| C | -0.507501 | 2.922410  | 1.223809  |
| C | -2.658154 | 3.654155  | 0.092290  |
| C | -2.773835 | -3.694715 | -2.270420 |
| C | -4.170403 | -3.550844 | -1.644054 |

|   |           |           |           |
|---|-----------|-----------|-----------|
| C | -1.991076 | -4.863085 | -1.647302 |
| C | -2.987148 | -4.025216 | -3.758300 |
| O | -0.636944 | 2.979845  | -1.836138 |
| O | -0.487658 | -2.756761 | 0.775351  |
| O | -2.181190 | -1.401202 | 2.655133  |
| O | -3.231219 | -0.536788 | 0.847159  |
| O | -2.983319 | 0.522968  | -1.184384 |
| O | -0.560617 | -0.123015 | -3.481000 |
| O | -2.082827 | 1.496163  | -3.816617 |
| O | -0.514924 | 3.694637  | 2.134301  |
| O | 0.613987  | 2.236085  | 0.855184  |
| H | -0.386595 | -0.079146 | 0.996196  |
| H | 1.186533  | 1.601065  | -1.001859 |
| H | 1.006762  | -0.833133 | -2.368781 |
| H | -0.392083 | -2.690919 | -3.681622 |
| H | 0.038869  | -3.051081 | -1.988919 |
| H | -2.541777 | -1.675356 | -2.880288 |
| H | -2.467090 | -3.220192 | 0.430741  |
| H | -2.187021 | 1.696478  | 0.846882  |
| H | -3.509679 | 3.303451  | -0.497602 |
| H | -2.169909 | 4.480465  | -0.429535 |
| H | -3.021778 | 4.026931  | 1.051977  |
| H | -4.156925 | -3.407682 | -0.559415 |
| H | -4.760972 | -4.451272 | -1.843179 |
| H | -4.701145 | -2.696318 | -2.079450 |
| H | -1.611186 | -4.662146 | -0.641838 |
| H | -1.126385 | -5.119529 | -2.268637 |
| H | -2.630960 | -5.750376 | -1.596486 |
| H | -3.582643 | -3.251215 | -4.254415 |
| H | -3.520364 | -4.976635 | -3.857249 |
| H | -2.037448 | -4.121742 | -4.293336 |
| H | -0.437844 | -2.817929 | 1.745439  |
| H | -1.423240 | 3.183741  | -2.370112 |
| H | 1.026162  | -0.616850 | 0.104016  |

#### C14

|   |           |           |           |
|---|-----------|-----------|-----------|
| C | 0.185163  | -0.024073 | -0.069450 |
| C | 0.465058  | 1.461831  | -0.337859 |
| C | -0.829924 | 2.022824  | -0.973591 |
| C | -1.498034 | 0.806195  | -1.654957 |
| C | -0.772399 | -0.463119 | -1.188694 |
| C | -0.061538 | -0.976947 | -2.465955 |
| C | -0.570222 | -2.392780 | -2.662331 |
| C | -2.040035 | -2.309055 | -2.221783 |
| C | -1.942631 | -1.470581 | -0.914815 |
| C | -1.854772 | -2.180019 | 0.429682  |
| C | -2.318841 | -1.099604 | 1.396028  |
| C | -3.118322 | -0.499510 | -0.674067 |
| C | -1.312405 | 0.843233  | -3.174769 |
| C | -1.515257 | 2.574510  | 0.238099  |
| C | -0.504780 | 2.750136  | 1.281010  |
| C | -2.874532 | 3.150540  | 0.334424  |
| C | -2.807490 | -3.655869 | -2.243790 |
| C | -4.227684 | -3.491729 | -1.680325 |
| C | -2.055877 | -4.783648 | -1.516620 |
| C | -2.965374 | -4.078404 | -3.715349 |
| O | -0.491253 | 3.052776  | -1.880687 |
| O | -0.594675 | -2.690170 | 0.751545  |
| O | -2.035841 | -1.036083 | 2.558089  |
| O | -3.102324 | -0.216554 | 0.743764  |
| O | -2.889790 | 0.660624  | -1.394019 |
| O | -0.497805 | -0.151149 | -3.562875 |
| O | -1.821723 | 1.625112  | -3.926835 |
| O | -0.615294 | 3.317619  | 2.336435  |
| O | 0.673556  | 2.170028  | 0.876204  |
| H | -0.272360 | -0.085855 | 0.920880  |
| H | 1.322355  | 1.639370  | -0.992374 |
| H | 1.027087  | -0.895315 | -2.418266 |
| H | -0.427854 | -2.733171 | -3.690433 |
| H | -0.015365 | -3.053758 | -1.985738 |
| H | -2.558043 | -1.659228 | -2.946955 |
| H | -2.618220 | -2.969941 | 0.478670  |
| H | -4.115758 | -0.860682 | -0.927534 |
| H | -3.610817 | 2.367261  | 0.549315  |
| H | -3.169434 | 3.625789  | -0.607292 |
| H | -2.903278 | 3.884853  | 1.143196  |
| H | -4.253682 | -3.250771 | -0.613010 |

|   |           |           |           |
|---|-----------|-----------|-----------|
| H | -4.787319 | -4.423792 | -1.810134 |
| H | -4.770614 | -2.705929 | -2.219218 |
| H | -1.736456 | -4.526153 | -0.503620 |
| H | -1.157213 | -5.069760 | -2.072808 |
| H | -2.695805 | -5.670379 | -1.456132 |
| H | -3.516259 | -3.324429 | -4.288390 |
| H | -3.520689 | -5.020362 | -3.775885 |
| H | -1.997131 | -4.235567 | -4.199504 |
| H | -0.502339 | -2.618319 | 1.718783  |
| H | -1.237334 | 3.199613  | -2.486744 |
| H | 1.089495  | -0.635005 | -0.033176 |

#### C14Me

|   |           |           |           |
|---|-----------|-----------|-----------|
| C | 0.074999  | -0.055119 | 0.035958  |
| C | 0.336432  | 1.421959  | -0.276192 |
| C | -0.976084 | 1.961696  | -0.874029 |
| C | -1.648699 | 0.734135  | -1.528406 |
| C | -0.859929 | -0.510437 | -1.099082 |
| C | -0.122984 | -0.941582 | -2.393978 |
| C | -0.574345 | -2.369145 | -2.646133 |
| C | -2.047546 | -2.359564 | -2.207537 |
| C | -1.978194 | -1.580590 | -0.862787 |
| C | -1.833633 | -2.359496 | 0.438084  |
| C | -2.342010 | -1.365481 | 1.469425  |
| C | -3.193460 | -0.676893 | -0.556364 |
| C | -1.518312 | 0.794756  | -3.052024 |
| C | -1.684587 | 2.505499  | 0.381445  |
| C | -0.494957 | 2.926175  | 1.241449  |
| C | -2.673342 | 3.586358  | 0.146979  |
| C | -2.764610 | -3.731517 | -2.292867 |
| C | -4.181775 | -3.654026 | -1.703471 |
| C | -1.959210 | -4.867650 | -1.639391 |
| C | -2.928077 | -4.079323 | -3.783306 |
| O | -0.644588 | 2.979043  | -1.777961 |
| O | -0.540751 | -2.810956 | 0.716230  |
| O | -2.040548 | -1.346349 | 2.629097  |
| O | -3.185112 | -0.493835 | 0.880580  |
| O | -3.018005 | 0.543539  | -1.189017 |
| O | -0.593236 | -0.097502 | -3.459728 |
| O | -2.132474 | 1.506715  | -3.790040 |
| O | -0.474085 | 3.735992  | 2.117817  |
| O | 0.604653  | 2.204413  | 0.881304  |
| H | -0.400260 | -0.109796 | 1.019912  |
| H | 1.161208  | 1.569913  | -0.979768 |
| H | 0.961433  | -0.818580 | -2.338577 |
| H | -0.417502 | -2.662086 | -3.686629 |
| H | 0.003412  | -3.034981 | -1.993994 |
| H | -2.590246 | -1.697540 | -2.903017 |
| H | -2.548889 | -3.194354 | 0.449573  |
| H | -4.176376 | -1.062659 | -0.828465 |
| H | -2.162610 | 1.662303  | 0.905869  |
| H | -3.637294 | 3.343116  | -0.281107 |
| H | -2.494717 | 4.576929  | 0.543091  |
| H | -4.202106 | -3.471538 | -0.624339 |
| H | -4.706597 | -4.599172 | -1.876726 |
| H | -4.762470 | -2.862749 | -2.192554 |
| H | -1.627301 | -4.651413 | -0.620668 |
| H | -1.062969 | -5.091610 | -2.227013 |
| H | -2.566239 | -5.778821 | -1.612758 |
| H | -3.522087 | -3.321197 | -4.305354 |
| H | -3.440989 | -5.041255 | -3.888245 |
| H | -1.961980 | -4.164173 | -4.289402 |
| H | -0.440853 | -2.793433 | 1.685124  |
| H | -1.466659 | 3.354977  | -2.135571 |
| H | 0.984945  | -0.655557 | 0.091568  |

#### C3OH

|   |           |           |           |
|---|-----------|-----------|-----------|
| C | 0.064797  | -0.037831 | 0.032964  |
| C | 0.369189  | 1.428289  | -0.290274 |
| C | -0.984834 | 1.982438  | -0.904075 |
| C | -1.651442 | 0.739535  | -1.545268 |
| C | -0.860004 | -0.499220 | -1.101984 |
| C | -0.111046 | -0.938632 | -2.386966 |
| C | -0.572000 | -2.364177 | -2.639206 |
| C | -2.046494 | -2.347348 | -2.204666 |
| C | -1.977322 | -1.567577 | -0.860348 |
| C | -1.829673 | -2.343498 | 0.441830  |

|   |           |           |           |
|---|-----------|-----------|-----------|
| C | -2.337440 | -1.347991 | 1.472591  |
| C | -3.190531 | -0.661316 | -0.552678 |
| C | -1.527139 | 0.773452  | -3.073785 |
| C | -1.658826 | 2.546827  | 0.355123  |
| C | -0.471444 | 2.919114  | 1.234866  |
| C | -2.605075 | 3.713680  | 0.114796  |
| C | -2.768591 | -3.716744 | -2.288748 |
| C | -4.184053 | -3.634298 | -1.696110 |
| C | -1.965695 | -4.855347 | -1.636363 |
| C | -2.935824 | -4.063899 | -3.778866 |
| O | -0.601218 | 2.941049  | -1.780223 |
| O | -0.533624 | -2.787706 | 0.719165  |
| O | -2.032251 | -1.327246 | 2.631399  |
| O | -3.177805 | -0.474467 | 0.883905  |
| O | -3.013206 | 0.557611  | -1.187447 |
| O | -0.557575 | -0.091767 | -3.455910 |
| O | -2.174413 | 1.423343  | -3.833804 |
| O | -0.447941 | 3.682334  | 2.149906  |
| O | 0.640411  | 2.217487  | 0.843800  |
| H | -0.420088 | -0.062657 | 1.013286  |
| H | 1.192572  | 1.547067  | -0.999978 |
| H | 0.974260  | -0.829480 | -2.316023 |
| H | -0.414334 | -2.657207 | -3.679495 |
| H | -0.000370 | -3.034373 | -1.986104 |
| H | -2.585744 | -1.684175 | -2.901870 |
| H | -2.541394 | -3.181182 | 0.455752  |
| H | -4.174927 | -1.045291 | -0.821452 |
| H | -2.192515 | 1.737678  | 0.871678  |
| H | -3.481699 | 3.377099  | -0.443372 |
| H | -2.102016 | 4.499789  | -0.452841 |
| H | -2.924437 | 4.125557  | 1.074378  |
| H | -4.200945 | -3.452569 | -0.616696 |
| H | -4.712705 | -4.577412 | -1.868630 |
| H | -4.763069 | -2.840678 | -2.183289 |
| H | -1.628891 | -4.638703 | -0.619240 |
| H | -1.072741 | -5.084505 | -2.226935 |
| H | -2.576696 | -5.763687 | -1.605502 |
| H | -3.529752 | -3.304766 | -4.299431 |
| H | -3.450321 | -5.025071 | -3.882881 |
| H | -1.970885 | -4.149949 | -4.286979 |
| H | -0.438821 | -2.783947 | 1.688742  |
| H | 0.969421  | -0.644641 | 0.109407  |

# C10OH

|   |           |           |           |
|---|-----------|-----------|-----------|
| C | 0.079705  | -0.050319 | 0.006359  |
| C | 0.360590  | 1.430152  | -0.285218 |
| C | -0.943142 | 1.993606  | -0.892324 |
| C | -1.618456 | 0.775464  | -1.565549 |
| C | -0.853564 | -0.481908 | -1.137752 |
| C | -0.124498 | -0.933210 | -2.429046 |
| C | -0.574699 | -2.365140 | -2.656187 |
| C | -2.046894 | -2.351094 | -2.213978 |
| C | -1.983629 | -1.535621 | -0.892290 |
| C | -1.803857 | -2.267731 | -0.437840 |
| C | -2.432112 | -1.304581 | 1.472627  |
| C | -3.193824 | -0.624139 | -0.617553 |
| C | -1.470109 | 0.839117  | -3.087653 |
| C | -1.654296 | 2.535729  | 0.351286  |
| C | -0.483122 | 2.895036  | 1.259422  |
| C | -2.605647 | 3.699181  | 0.126512  |
| C | -2.763762 | -3.725855 | -2.264537 |
| C | -4.157327 | -3.647067 | -1.622773 |
| C | -1.938983 | -4.861246 | -1.635090 |
| C | -2.975769 | -4.083935 | -3.746323 |
| O | -0.587740 | 3.007177  | -1.798196 |
| O | -0.561430 | -2.705141 | 0.764127  |
| O | -2.266284 | -1.296772 | 2.650704  |
| O | -3.230545 | -0.433750 | 0.809857  |
| O | -2.994849 | 0.593467  | -1.254460 |
| O | -0.603774 | -0.103587 | -3.502447 |
| O | -2.033683 | 1.599046  | -3.821163 |
| O | -0.475396 | 3.654240  | 2.180381  |
| O | 0.624463  | 2.185842  | 0.886860  |
| H | -0.403598 | -0.108319 | 0.988092  |
| H | 1.194603  | 1.575377  | -0.978033 |
| H | 0.960276  | -0.807777 | -2.382885 |
| H | -0.419246 | -2.679218 | -3.690906 |

|   |           |           |           |
|---|-----------|-----------|-----------|
| H | 0.008107  | -3.015637 | -1.993526 |
| H | -2.591814 | -1.707362 | -2.924375 |
| H | -2.439027 | -3.171794 | 0.490075  |
| H | -4.170505 | -1.003526 | -0.920351 |
| H | -2.190350 | 1.716536  | 0.849435  |
| H | -3.460555 | 3.380457  | -0.476567 |
| H | -2.092558 | 4.521919  | -0.376822 |
| H | -2.968107 | 4.064071  | 1.089665  |
| H | -4.138527 | -3.429759 | -0.548868 |
| H | -4.677398 | -4.602670 | -1.744415 |
| H | -4.767294 | -2.877619 | -2.110318 |
| H | -1.617616 | -4.667652 | -0.608368 |
| H | -1.036944 | -5.058809 | -2.222675 |
| H | -2.531182 | -5.782207 | -1.627992 |
| H | -3.590690 | -3.331586 | -4.251818 |
| H | -3.486247 | -5.049092 | -3.830131 |
| H | -2.025930 | -4.164958 | -4.283305 |
| H | -1.363299 | 3.237518  | -2.336921 |
| H | 0.986285  | -0.658255 | 0.064462  |

# 1B

|   |           |           |           |
|---|-----------|-----------|-----------|
| C | 0.021258  | -0.024291 | 0.080603  |
| C | 0.335864  | 1.427441  | -0.283397 |
| C | -0.971689 | 1.972739  | -0.884574 |
| C | -1.646717 | 0.725371  | -1.518025 |
| C | -0.867920 | -0.515604 | -1.068212 |
| C | -0.096536 | -0.963773 | -2.336629 |
| C | -0.558974 | -2.388780 | -2.584275 |
| C | -2.041378 | -2.361969 | -2.176474 |
| C | -1.988985 | -1.584222 | -0.831984 |
| C | -1.844146 | -2.373154 | 0.473608  |
| C | -2.322687 | -1.354171 | 1.511696  |
| C | -3.190629 | -0.672363 | -0.527330 |
| C | -1.479825 | 0.764562  | -3.039868 |
| C | -1.664655 | 2.543763  | 0.358289  |
| C | -0.480652 | 2.924717  | 1.241986  |
| C | -2.617995 | 3.703101  | 0.119683  |
| C | -2.777955 | -3.722817 | -2.281163 |
| C | -4.202410 | -3.623332 | -1.714246 |
| C | -2.009411 | -4.878242 | -1.619550 |
| C | -2.919910 | -4.057226 | -3.776943 |
| O | 1.153292  | -0.861532 | 0.229595  |
| O | -0.635586 | 2.965552  | -1.818257 |
| O | -0.631452 | -2.991567 | 0.742865  |
| O | -2.040552 | -1.279695 | 2.668618  |
| O | -3.159158 | -0.467781 | 0.894878  |
| O | -3.013484 | 0.543097  | -1.188970 |
| O | -0.544975 | -0.122193 | -3.418004 |
| O | -2.069876 | 1.485622  | -3.792471 |
| O | -0.454652 | 3.697856  | 2.148919  |
| O | 0.630195  | 2.209916  | 0.862402  |
| H | -0.537472 | 0.008198  | 1.025618  |
| H | 1.169913  | 1.501068  | -0.988711 |
| H | 0.985376  | -0.849132 | -2.257703 |
| H | -0.380956 | -2.693189 | -3.617981 |
| H | -0.002639 | -3.052132 | -1.911658 |
| H | -2.562308 | -1.693432 | -2.882781 |
| H | -2.597596 | -3.168418 | 0.488130  |
| H | -4.177519 | -1.052079 | -0.793846 |
| H | -2.196345 | 1.735956  | 0.880887  |
| H | -3.479936 | 3.368915  | -0.464456 |
| H | -2.111941 | 4.513336  | -0.409958 |
| H | -2.969215 | 4.089298  | 1.078648  |
| H | -4.233424 | -3.452043 | -0.633520 |
| H | -4.741757 | -4.556992 | -1.904092 |
| H | -4.761385 | -2.816453 | -2.203392 |
| H | -1.732161 | -4.691823 | -0.579703 |
| H | -1.084165 | -5.089482 | -2.165747 |
| H | -2.620520 | -5.786550 | -1.652808 |
| H | -3.487418 | -3.283647 | -4.305986 |
| H | -3.450904 | -5.007284 | -3.897939 |
| H | -1.946083 | -4.160378 | -4.264818 |
| H | 0.098133  | -2.343385 | 0.725016  |
| H | 1.698536  | -0.507608 | 0.950865  |
| H | -1.412706 | 3.159492  | -2.369592 |

**C1**

|   |           |           |           |
|---|-----------|-----------|-----------|
| C | 0.072942  | -0.019652 | -0.055772 |
| C | 0.323496  | 1.442309  | -0.205693 |
| C | -0.955553 | 1.971331  | -0.876269 |
| C | -1.591591 | 0.715357  | -1.556328 |
| C | -0.799785 | -0.540354 | -1.147161 |
| C | -0.096864 | -1.001121 | -2.460819 |
| C | -0.591724 | -2.416522 | -2.695541 |
| C | -2.049571 | -2.377359 | -2.208606 |
| C | -1.923861 | -1.607606 | -0.868416 |
| C | -1.729364 | -2.380248 | 0.439262  |
| C | -2.033484 | -1.285225 | 1.459286  |
| C | -3.093514 | -0.681928 | -0.507670 |
| C | -1.449841 | 0.789779  | -3.077850 |
| C | -1.737105 | 2.523680  | 0.324187  |
| C | -0.651059 | 2.817184  | 1.349515  |
| C | -2.622939 | 3.726307  | 0.041541  |
| C | -2.807388 | -3.728932 | -2.279762 |
| C | -4.211423 | -3.600246 | -1.670636 |
| C | -2.045587 | -4.891094 | -1.624481 |
| C | -2.995315 | -4.074795 | -3.767626 |
| O | 0.991571  | -0.807736 | 0.565201  |
| O | -0.578939 | 2.960847  | -1.797422 |
| O | -0.544679 | -3.076400 | 0.624479  |
| O | -1.579447 | -1.137423 | 2.552749  |
| O | -2.950312 | -0.437692 | 0.904160  |
| O | -2.956303 | 0.503888  | -1.225965 |
| O | -0.575959 | -0.136400 | -3.508248 |
| O | -2.020955 | 1.557382  | -3.799073 |
| O | -0.710443 | 3.529132  | 2.304073  |
| O | 0.482203  | 2.102584  | 1.046346  |
| H | 1.212560  | 1.671634  | -0.810144 |
| H | 0.990388  | -0.902632 | -2.430884 |
| H | -0.474696 | -2.712884 | -3.740351 |
| H | -0.008779 | -3.092730 | -2.059794 |
| H | -2.598386 | -1.699988 | -2.884846 |
| H | -2.544493 | -3.107614 | 0.536135  |
| H | -4.100401 | -1.059221 | -0.688521 |
| H | -2.337398 | 1.718021  | 0.762654  |
| H | -3.438035 | 3.445819  | -0.632031 |
| H | -2.044681 | 4.535746  | -0.409709 |
| H | -3.050102 | 4.090571  | 0.978045  |
| H | -4.200314 | -3.427386 | -0.589688 |
| H | -4.774760 | -4.523738 | -1.839651 |
| H | -4.770212 | -2.782932 | -2.142499 |
| H | -1.788106 | -4.718655 | -0.577492 |
| H | -1.111880 | -5.096629 | -2.157959 |
| H | -2.657167 | -5.798251 | -1.678618 |
| H | -3.546310 | -3.287051 | -4.293428 |
| H | -3.562885 | -5.006118 | -3.865467 |
| H | -2.037149 | -4.219180 | -4.275601 |
| H | 0.149028  | -2.444673 | 0.884335  |
| H | 1.374961  | -0.298615 | 1.301931  |
| H | -1.337007 | 3.162520  | -2.372254 |

**C2**

|   |           |           |           |
|---|-----------|-----------|-----------|
| C | 0.047823  | -0.122513 | 0.137220  |
| C | 0.165302  | 1.366025  | -0.006633 |
| C | -0.977371 | 1.954857  | -0.793482 |
| C | -1.659479 | 0.715063  | -1.434604 |
| C | -0.866229 | -0.535683 | -1.032899 |
| C | -0.125204 | -0.944180 | -2.332962 |
| C | -0.575909 | -2.369942 | -2.597890 |
| C | -2.051561 | -2.363731 | -2.163114 |
| C | -1.978873 | -1.614938 | -0.803126 |
| C | -1.801994 | -2.437020 | 0.477754  |
| C | -2.289530 | -1.463876 | 1.558266  |
| C | -3.176487 | -0.715825 | -0.448531 |
| C | -1.531948 | 0.793704  | -2.958247 |
| C | -1.753573 | 2.675394  | 0.320939  |
| C | -0.631325 | 3.031862  | 1.288026  |
| C | -2.590341 | 3.870631  | -0.098212 |
| C | -2.781471 | -3.726642 | -2.284469 |
| C | -4.193668 | -3.650761 | -1.684101 |
| C | -1.990059 | -4.893166 | -1.670757 |
| C | -2.955091 | -4.024726 | -3.784641 |
| O | 1.246321  | -0.884599 | 0.093756  |

|   |           |           |           |
|---|-----------|-----------|-----------|
| O | -0.458557 | 2.853706  | -1.746232 |
| O | -0.573790 | -3.042299 | 0.713956  |
| O | -2.026581 | -1.451709 | 2.721929  |
| O | -3.116031 | -0.545399 | 0.976410  |
| O | -3.016638 | 0.518222  | -1.077440 |
| O | -0.626049 | -0.095379 | -3.385832 |
| O | -2.131632 | 1.547182  | -3.672022 |
| O | -0.568469 | 3.895916  | 2.099605  |
| O | 0.404539  | 2.106280  | 1.117309  |
| H | -0.433949 | -0.294532 | 1.111814  |
| H | 0.954237  | -0.804558 | -2.283035 |
| H | -0.415177 | -2.653695 | -3.640287 |
| H | -0.000274 | -3.040746 | -1.949308 |
| H | -2.588970 | -1.683986 | -2.845515 |
| H | -2.537487 | -3.248716 | 0.478801  |
| H | -4.167601 | -1.091805 | -0.705282 |
| H | -2.377391 | 1.933186  | 0.840485  |
| H | -3.389203 | 3.550696  | -0.773614 |
| H | -1.969790 | 4.617323  | -0.599080 |
| H | -3.039846 | 4.337114  | 0.780884  |
| H | -4.202561 | -3.505934 | -0.599067 |
| H | -4.731586 | -4.582942 | -1.885107 |
| H | -4.767935 | -2.835779 | -2.141065 |
| H | -1.686819 | -4.731215 | -0.634018 |
| H | -1.077950 | -5.084585 | -2.245630 |
| H | -2.596414 | -5.804382 | -1.710919 |
| H | -3.541228 | -3.243275 | -4.280739 |
| H | -3.480421 | -4.976349 | -3.917631 |
| H | -1.991824 | -4.106216 | -4.296917 |
| H | 0.158928  | -2.403305 | 0.638159  |
| H | 1.854574  | -0.535631 | 0.764318  |
| H | -1.183444 | 3.135072  | -2.331268 |

**C6**

|   |           |           |           |
|---|-----------|-----------|-----------|
| C | 0.030686  | -0.035547 | 0.024447  |
| C | 0.343626  | 1.422622  | -0.309930 |
| C | -0.972985 | 1.990649  | -0.871015 |
| C | -1.650468 | 0.768493  | -1.546798 |
| C | -0.892524 | -0.492168 | -1.113717 |
| C | -0.204623 | -0.954512 | -2.387404 |
| C | -0.555692 | -2.389470 | -2.615566 |
| C | -2.049514 | -2.383911 | -2.188915 |
| C | -2.017730 | -1.560437 | -0.865568 |
| C | -1.888747 | -2.315769 | 0.461651  |
| C | -2.384071 | -1.274121 | 1.467945  |
| C | -3.222602 | -0.636583 | -0.599754 |
| C | -1.446433 | 0.841178  | -3.065696 |
| C | -1.647140 | 2.514135  | 0.402267  |
| C | -0.446186 | 2.871868  | 1.274338  |
| C | -2.608540 | 3.677635  | 0.222655  |
| C | -2.764860 | -3.757795 | -2.256489 |
| C | -4.200591 | -3.650362 | -1.718933 |
| C | -1.996231 | -4.880448 | -1.541891 |
| C | -2.876209 | -4.146704 | -3.741651 |
| O | 1.154735  | -0.886909 | 0.120735  |
| O | -0.644345 | 3.021613  | -1.765110 |
| O | -0.683455 | -2.932846 | 0.760783  |
| O | -2.119138 | -1.163835 | 2.625652  |
| O | -3.227226 | -0.416559 | 0.817876  |
| O | -3.027011 | 0.577292  | -1.265916 |
| O | -0.562413 | -0.120767 | -3.445240 |
| O | -1.964634 | 1.602080  | -3.825604 |
| O | -0.406660 | 3.617041  | 2.203938  |
| O | 0.659673  | 2.176624  | 0.849435  |
| H | -0.506310 | -0.025787 | 0.983488  |
| H | 1.164627  | 1.505728  | -1.029070 |
| H | -0.389615 | -2.701348 | -3.647765 |
| H | 0.022929  | -3.025943 | -1.937052 |
| H | -2.576099 | -1.743721 | -2.917278 |
| H | -2.645707 | -3.107784 | 0.485407  |
| H | -4.204268 | -1.012889 | -0.890436 |
| H | -2.167059 | 1.688665  | 0.908162  |
| H | -3.480885 | 3.361878  | -0.356285 |
| H | -2.115173 | 4.509300  | -0.285440 |
| H | -2.942563 | 4.027377  | 1.201521  |
| H | -4.253308 | -3.432471 | -0.647578 |
| H | -4.726637 | -4.597373 | -1.877664 |



|   |           |           |           |
|---|-----------|-----------|-----------|
| H | -4.758869 | -2.871427 | -2.252368 |
| H | -1.760139 | -4.666830 | -0.497589 |
| H | -1.048067 | -5.083553 | -2.050595 |
| H | -2.587279 | -5.801892 | -1.577295 |
| H | -3.429016 | -3.391512 | -4.311492 |
| H | -3.408638 | -5.098605 | -3.838727 |
| H | -1.892522 | -4.272175 | -4.203823 |
| H | 0.063155  | -2.309997 | 0.672276  |
| H | 1.731651  | -0.546715 | 0.823847  |
| H | -1.430368 | 3.256980  | -2.285823 |

# C7

|   |           |           |           |
|---|-----------|-----------|-----------|
| C | 0.011761  | -0.032181 | 0.107611  |
| C | 0.343096  | 1.416028  | -0.254851 |
| C | -0.953411 | 1.973434  | -0.866459 |
| C | -1.628298 | 0.733363  | -1.516421 |
| C | -0.873390 | -0.517604 | -1.048655 |
| C | -0.085721 | -0.987952 | -2.299606 |
| C | -0.660014 | -2.319325 | -2.612962 |
| C | -2.082061 | -2.361899 | -2.150476 |
| C | -2.014156 | -1.564593 | -0.813112 |
| C | -1.895713 | -2.336764 | 0.503787  |
| C | -2.379516 | -1.296200 | 1.519807  |
| C | -3.208304 | -0.634610 | -0.541672 |
| C | -1.409273 | 0.783873  | -3.031380 |
| C | -1.654893 | 2.544274  | 0.371859  |
| C | -0.475436 | 2.916251  | 1.265937  |
| C | -2.598772 | 3.710508  | 0.128918  |
| C | -2.766645 | -3.752420 | -2.230584 |
| C | -4.200743 | -3.688366 | -1.685906 |
| C | -1.958677 | -4.854240 | -1.529497 |
| C | -2.870402 | -4.121043 | -3.721196 |
| O | 1.135263  | -0.877867 | 0.266331  |
| O | -0.600059 | 2.970828  | -1.788854 |
| O | -0.697954 | -2.967096 | 0.796838  |
| O | -2.119030 | -1.206879 | 2.680318  |
| O | -3.199937 | -0.411215 | 0.876260  |
| O | -3.004396 | 0.566893  | -1.221151 |
| O | -0.424109 | -0.060661 | -3.375963 |
| O | -1.992180 | 1.494555  | -3.799818 |
| O | -0.452257 | 3.687690  | 2.174373  |
| O | 0.634237  | 2.195868  | 0.893641  |
| H | -0.554139 | 0.005008  | 1.048048  |
| H | 1.183650  | 1.481052  | -0.953342 |
| H | 0.998152  | -0.957217 | -2.185818 |
| H | -0.232649 | -2.973265 | -3.361702 |
| H | -2.672543 | -1.715114 | -2.835224 |
| H | -2.662373 | -3.119278 | 0.521449  |
| H | -4.193729 | -1.010286 | -0.822697 |
| H | -2.196278 | 1.739387  | 0.888511  |
| H | -3.457635 | 3.384018  | -0.464014 |
| H | -2.083019 | 4.519815  | -0.392738 |
| H | -2.955983 | 4.095118  | 1.086316  |
| H | -4.253099 | -3.471644 | -0.614438 |
| H | -4.698818 | -4.650896 | -1.840977 |
| H | -4.785172 | -2.926059 | -2.215355 |
| H | -1.827812 | -4.695427 | -0.457878 |
| H | -0.956711 | -4.933748 | -1.963889 |
| H | -2.461272 | -5.817030 | -1.671664 |
| H | -3.431787 | -3.364329 | -4.280462 |
| H | -3.390251 | -5.078151 | -3.832454 |
| H | -1.885635 | -4.226398 | -4.186424 |
| H | 0.051084  | -2.346351 | 0.720046  |
| H | 1.672204  | -0.532663 | 0.997911  |
| H | -1.370331 | 3.177259  | -2.345099 |

# C8

|   |           |           |           |
|---|-----------|-----------|-----------|
| C | 0.035988  | 0.003702  | 0.113171  |
| C | 0.318466  | 1.445712  | -0.312415 |
| C | -1.006742 | 1.938082  | -0.922921 |
| C | -1.666425 | 0.651424  | -1.491722 |
| C | -0.842270 | -0.548143 | -1.013330 |
| C | -0.066894 | -0.999901 | -2.278874 |
| C | -0.474096 | -2.448779 | -2.496034 |
| C | -1.884593 | -2.508265 | -1.973672 |
| C | -1.927076 | -1.641705 | -0.740820 |
| C | -1.760552 | -2.407593 | 0.589739  |

|   |           |           |           |
|---|-----------|-----------|-----------|
| C | -2.240827 | -1.373907 | 1.608019  |
| C | -3.155761 | -0.754205 | -0.439920 |
| C | -1.538830 | 0.632403  | -3.016267 |
| C | -1.698456 | 2.549092  | 0.301560  |
| C | -0.514780 | 2.988882  | 1.157580  |
| C | -2.676125 | 3.678855  | 0.023052  |
| C | -2.779029 | -3.683372 | -2.296519 |
| C | -4.196857 | -3.537177 | -1.727944 |
| C | -2.137564 | -4.977907 | -1.749483 |
| C | -2.906973 | -3.809304 | -3.826566 |
| O | 1.182017  | -0.806391 | 0.296946  |
| O | -0.701329 | 2.893249  | -1.905087 |
| O | -0.534379 | -3.002417 | 0.834766  |
| O | -1.935251 | -1.259180 | 2.756176  |
| O | -3.099514 | -0.519133 | 0.980237  |
| O | -3.017871 | 0.453145  | -1.118971 |
| O | -0.558524 | -0.210282 | -3.377518 |
| O | -2.180691 | 1.291654  | -3.782759 |
| O | -0.496240 | 3.799747  | 2.031256  |
| O | 0.606315  | 2.280399  | 0.797723  |
| H | -0.525382 | 0.065494  | 1.055249  |
| H | 1.144450  | 1.508489  | -1.028153 |
| H | 1.010416  | -0.841574 | -2.213786 |
| H | -0.357708 | -2.739078 | -3.543057 |
| H | 0.181875  | -3.091915 | -1.885395 |
| H | -2.502550 | -3.215784 | 0.609430  |
| H | -4.138216 | -1.158673 | -0.673785 |
| H | -2.210068 | 1.753600  | 0.861983  |
| H | -3.535885 | 3.303942  | -0.539270 |
| H | -2.190375 | 4.475976  | -0.544271 |
| H | -3.027432 | 4.098248  | 0.967933  |
| H | -4.213693 | -3.458087 | -0.635553 |
| H | -4.786863 | -4.419896 | -1.993542 |
| H | -4.703419 | -2.662735 | -2.150430 |
| H | -1.989136 | -4.939097 | -0.665538 |
| H | -1.160496 | -5.153603 | -2.210946 |
| H | -2.777184 | -5.837308 | -1.979226 |
| H | -3.294985 | -2.883313 | -4.263225 |
| H | -3.594909 | -4.624133 | -4.075575 |
| H | -1.945876 | -4.033926 | -4.297451 |
| H | 0.173900  | -2.330496 | 0.838525  |
| H | 1.727591  | -0.404525 | 0.992332  |
| H | -1.492974 | 3.056404  | -2.445625 |

# C8tBu

|   |           |           |           |
|---|-----------|-----------|-----------|
| C | 0.027151  | -0.006252 | 0.085114  |
| C | 0.337764  | 1.448706  | -0.269207 |
| C | -0.972111 | 1.994040  | -0.866049 |
| C | -1.642816 | 0.749065  | -1.508870 |
| C | -0.859627 | -0.492261 | -1.067210 |
| C | -0.086627 | -0.929023 | -2.340551 |
| C | -0.543361 | -2.353995 | -2.595675 |
| C | -2.021042 | -2.336435 | -2.179912 |
| C | -1.977398 | -1.565460 | -0.834248 |
| C | -1.835790 | -2.359657 | 0.468074  |
| C | -2.319075 | -1.346664 | 1.509490  |
| C | -3.183657 | -0.659931 | -0.529049 |
| C | -1.475845 | 0.800133  | -3.030344 |
| C | -1.666495 | 2.553476  | 0.381318  |
| C | -0.483419 | 2.931880  | 1.267442  |
| C | -2.623626 | 3.711525  | 0.151718  |
| C | -2.732846 | -3.710010 | -2.305523 |
| C | -4.179045 | -3.631486 | -1.769683 |
| C | -1.970485 | -4.862106 | -1.627266 |
| C | -2.816674 | -4.016931 | -3.776429 |
| O | 1.159712  | -0.842961 | 0.230905  |
| O | -0.639572 | 2.994992  | -1.792213 |
| O | -0.624609 | -2.979953 | 0.737557  |
| O | -2.039302 | -1.275546 | 2.667133  |
| O | -3.158073 | -0.461643 | 0.894129  |
| O | -3.009707 | 0.595552  | -1.183580 |
| O | -0.540181 | -0.081857 | -3.415629 |
| O | -2.068606 | 1.525384  | -3.776987 |
| O | -0.459818 | 3.698207  | 2.180194  |
| O | 0.629914  | 2.224155  | 0.881898  |
| H | -0.533187 | 0.019306  | 1.029562  |
| H | 1.171166  | 1.530231  | -0.974437 |

|   |           |           |           |
|---|-----------|-----------|-----------|
| H | 0.994630  | -0.808832 | -2.261230 |
| H | -0.385260 | -2.664060 | -3.631812 |
| H | 0.019962  | -3.018360 | -1.929822 |
| H | -2.550568 | -1.671552 | -2.883316 |
| H | -2.591293 | -3.153770 | 0.475177  |
| H | -4.167855 | -1.043882 | -0.800950 |
| H | -2.195522 | 1.740209  | 0.898048  |
| H | -3.484862 | 3.378973  | -0.434383 |
| H | -2.120442 | 4.527205  | -0.372260 |
| H | -2.975454 | 4.089479  | 1.113752  |
| H | -4.227188 | -3.466486 | -0.687000 |
| H | -4.701515 | -4.569974 | -1.978048 |
| H | -4.733727 | -2.826730 | -2.265621 |
| H | -1.742475 | -4.684196 | -0.574697 |
| H | -1.022091 | -5.049168 | -2.139850 |
| H | -2.566952 | -5.777849 | -1.698421 |
| H | -3.155024 | -3.255197 | -4.472023 |
| H | -2.831491 | -5.048186 | -4.111294 |
| H | 0.104719  | -2.331320 | 0.726135  |
| H | 1.711341  | -0.483291 | 0.944453  |
| H | -1.416833 | 3.189049  | -2.343331 |

# C10

|   |           |           |           |
|---|-----------|-----------|-----------|
| C | 0.024643  | -0.089375 | -0.080001 |
| C | 0.416325  | 1.362552  | -0.359694 |
| C | -0.891371 | 2.036842  | -0.836064 |
| C | -1.738099 | 0.871139  | -1.423608 |
| C | -0.959394 | -0.415752 | -1.192881 |
| C | -0.322698 | -0.752012 | -2.553884 |
| C | -0.630194 | -2.223920 | -2.774745 |
| C | -2.054636 | -2.382759 | -2.225248 |
| C | -2.063849 | -1.483186 | -0.937665 |
| C | -1.987650 | -2.079890 | 0.420640  |
| C | -3.117175 | -1.691059 | 1.241663  |
| C | -3.371961 | -0.636305 | -0.783094 |
| C | -1.828294 | 0.973986  | -2.953543 |
| C | -1.424733 | 2.636797  | 0.469127  |
| C | -0.155460 | 2.852904  | 1.284798  |
| C | -2.264995 | 3.895983  | 0.333038  |
| C | -2.625607 | -3.817715 | -2.156037 |
| C | -4.084456 | -3.758629 | -1.683749 |
| C | -1.832342 | -4.764100 | -1.245095 |
| C | -2.602812 | -4.395949 | -3.580548 |
| O | 1.080338  | -1.034260 | -0.090826 |
| O | -0.548080 | 3.004992  | -1.792566 |
| O | -0.935659 | -2.674188 | 0.983221  |
| O | -3.360195 | -1.945093 | 2.389441  |
| O | -3.962798 | -0.924540 | 0.451032  |
| O | -2.998015 | 0.732691  | -0.815471 |
| O | -1.027077 | 0.051173  | -3.523082 |
| O | -2.502834 | 1.747311  | -3.570006 |
| O | 0.006609  | 3.574340  | 2.219949  |
| O | 0.845795  | 2.044495  | 0.806639  |
| H | -0.493824 | -0.111104 | 0.891528  |
| H | 1.201404  | 1.435188  | -1.118911 |
| H | 0.739423  | -0.507181 | -2.624237 |
| H | -0.536564 | -2.502351 | -3.827111 |
| H | 0.093368  | -2.810192 | -2.193949 |
| H | -2.705534 | -1.850904 | -2.936758 |
| H | -4.111856 | -0.828967 | -1.565434 |
| H | -2.005297 | 1.868282  | 0.997596  |
| H | -3.193792 | 3.674607  | -0.200453 |
| H | -1.712592 | 4.671297  | -0.203079 |
| H | -2.511915 | 4.278984  | 1.325131  |
| H | -4.176833 | -3.341484 | -0.675322 |
| H | -4.514969 | -4.765080 | -1.661189 |
| H | -4.694604 | -3.151735 | -2.363680 |
| H | -1.937061 | -4.520906 | -0.186251 |
| H | -0.765244 | -4.771550 | -1.495225 |
| H | -2.201934 | -5.785736 | -1.383674 |
| H | -3.090592 | -3.722213 | -4.294439 |
| H | -3.134494 | -5.352688 | -3.603263 |
| H | -1.579925 | -4.578703 | -3.925854 |
| H | -0.128425 | -2.518310 | 0.452860  |
| H | 1.710814  | -0.800301 | 0.609343  |
| H | -1.361374 | 3.336251  | -2.210256 |

# C12

|   |           |           |           |
|---|-----------|-----------|-----------|
| C | 0.038399  | -0.018280 | 0.084080  |
| C | 0.335849  | 1.437192  | -0.277987 |
| C | -0.971733 | 1.962961  | -0.897327 |
| C | -1.626457 | 0.702701  | -1.527649 |
| C | -0.825304 | -0.525581 | -1.072665 |
| C | -0.059707 | -0.975134 | -2.342388 |
| C | -0.527320 | -2.401679 | -2.586748 |
| C | -2.005978 | -2.362674 | -2.170096 |
| C | -1.938287 | -1.602767 | -0.816974 |
| C | -1.801808 | -2.403697 | 0.483848  |
| C | -2.370079 | -1.435062 | 1.528081  |
| C | -3.100724 | -0.690957 | -0.500003 |
| C | -1.470198 | 0.734923  | -3.047778 |
| C | -1.684764 | 2.534796  | 0.334738  |
| C | -0.515306 | 2.932862  | 1.230452  |
| C | -2.648611 | 3.681509  | 0.078257  |
| C | -2.781982 | -3.697036 | -2.273521 |
| C | -4.187802 | -3.543643 | -1.671424 |
| C | -2.027259 | -4.880139 | -1.645395 |
| C | -2.968732 | -4.009127 | -3.768892 |
| O | 1.178247  | -0.837720 | 0.255031  |
| O | -0.638193 | 2.950949  | -1.835574 |
| O | -0.580846 | -2.985290 | 0.790102  |
| O | -2.173375 | -1.382643 | 2.700076  |
| O | -3.214045 | -0.549608 | 0.880364  |
| O | -2.996398 | 0.503217  | -1.157092 |
| O | -0.516651 | -0.134019 | -3.422292 |
| O | -2.072959 | 1.444353  | -3.801012 |
| O | -0.508680 | 3.710092  | 2.133859  |
| O | 0.606855  | 2.226550  | 0.868433  |
| H | -0.544954 | 0.003997  | 1.017874  |
| H | 1.176405  | 1.519146  | -0.974636 |
| H | 1.022678  | -0.859219 | -2.271164 |
| H | -0.357613 | -2.706194 | -3.621921 |
| H | 0.031140  | -3.068389 | -1.918537 |
| H | -2.522684 | -1.676304 | -2.860846 |
| H | -2.527017 | -3.223174 | 0.456612  |
| H | -2.214088 | 1.725509  | 0.857711  |
| H | -3.500596 | 3.334026  | -0.512634 |
| H | -2.145727 | 4.494244  | -0.450587 |
| H | -3.014410 | 4.069539  | 1.030974  |
| H | -4.190062 | -3.410619 | -0.585427 |
| H | -4.783451 | -4.436571 | -1.888282 |
| H | -4.703030 | -2.680061 | -2.107861 |
| H | -1.692585 | -4.704804 | -0.620014 |
| H | -1.136424 | -5.122860 | -2.234783 |
| H | -2.670288 | -5.766699 | -1.646969 |
| H | -3.542938 | -3.222210 | -4.270037 |
| H | -3.512761 | -4.951954 | -3.888406 |
| H | -2.009401 | -4.114397 | -4.285013 |
| H | 0.137820  | -2.326147 | 0.754407  |
| H | 1.720999  | -0.459648 | 0.965974  |
| H | -1.415739 | 3.141081  | -2.387852 |

# C14

|   |           |           |           |
|---|-----------|-----------|-----------|
| C | 0.088061  | 0.010200  | 0.017081  |
| C | 0.446012  | 1.454920  | -0.345070 |
| C | -0.843178 | 2.017013  | -0.978567 |
| C | -1.526400 | 0.780616  | -1.622755 |
| C | -0.803020 | -0.476412 | -1.129103 |
| C | -0.033775 | -0.993047 | -2.370599 |
| C | -0.545219 | -2.407178 | -2.579561 |
| C | -2.029871 | -2.317097 | -2.189391 |
| C | -1.968246 | -1.492618 | -0.873215 |
| C | -1.878557 | -2.228497 | 0.467241  |
| C | -2.337594 | -1.147696 | 1.453576  |
| C | -3.138362 | -0.524699 | -0.627952 |
| C | -1.311376 | 0.787017  | -3.140466 |
| C | -1.497238 | 2.610070  | 0.232383  |
| C | -0.459363 | 2.820867  | 1.240966  |
| C | -2.861242 | 3.167995  | 0.352054  |
| C | -2.810375 | -3.655614 | -2.253602 |
| C | -4.239920 | -3.484247 | -1.717812 |
| C | -2.094419 | -4.807897 | -1.530614 |
| C | -2.937442 | -4.046213 | -3.736952 |
| O | 1.194865  | -0.853616 | 0.195418  |

|   |           |           |           |
|---|-----------|-----------|-----------|
| O | -0.506518 | 3.020583  | -1.912736 |
| O | -0.696422 | -2.881512 | 0.787107  |
| O | -2.089779 | -1.048963 | 2.615914  |
| O | -3.110703 | -0.244455 | 0.779564  |
| O | -2.910867 | 0.644036  | -1.352773 |
| O | -0.433103 | -0.166640 | -3.483348 |
| O | -1.837408 | 1.531911  | -3.918166 |
| O | -0.529625 | 3.427736  | 2.275657  |
| O | 0.709792  | 2.206321  | 0.827945  |
| H | -0.482249 | 0.073452  | 0.953106  |
| H | 1.304101  | 1.522022  | -1.020519 |
| H | 1.050472  | -0.916555 | -2.278568 |
| H | -0.367134 | -2.751544 | -3.600653 |
| H | -0.018447 | -3.066837 | -1.879863 |
| H | -2.519924 | -1.657018 | -2.925291 |
| H | -2.662411 | -2.993351 | 0.500733  |
| H | -4.135520 | -0.882274 | -0.887876 |
| H | -3.575545 | 2.374417  | 0.602000  |
| H | -3.188535 | 3.615011  | -0.592633 |
| H | -2.882716 | 3.919743  | 1.144632  |
| H | -4.282773 | -3.267918 | -0.645642 |
| H | -4.808503 | -4.405810 | -1.879485 |
| H | -4.761906 | -2.679256 | -2.249199 |
| H | -1.833171 | -4.589183 | -0.492910 |
| H | -1.165506 | -5.070994 | -2.047300 |
| H | -2.734601 | -5.696537 | -1.541775 |
| H | -3.464526 | -3.274188 | -4.308492 |
| H | -3.502625 | -4.979546 | -3.829904 |
| H | -1.959437 | -4.206726 | -4.200339 |
| H | 0.061121  | -2.267631 | 0.747421  |
| H | 1.743217  | -0.493115 | 0.911376  |
| H | -1.251836 | 3.148256  | -2.524688 |

#### C14Me

|   |           |           |           |
|---|-----------|-----------|-----------|
| C | 0.004087  | -0.036159 | 0.104974  |
| C | 0.312395  | 1.416369  | -0.257756 |
| C | -0.991837 | 1.952565  | -0.865745 |
| C | -1.668629 | 0.707489  | -1.496216 |
| C | -0.878524 | -0.527585 | -1.050220 |
| C | -0.099954 | -0.958117 | -2.321003 |
| C | -0.557530 | -2.382558 | -2.584503 |
| C | -2.040289 | -2.367313 | -2.176643 |
| C | -1.991272 | -1.605904 | -0.822763 |
| C | -1.838160 | -2.409705 | 0.472914  |
| C | -2.316580 | -1.404906 | 1.524648  |
| C | -3.197041 | -0.704381 | -0.502998 |
| C | -1.513708 | 0.749734  | -3.019437 |
| C | -1.695552 | 2.527274  | 0.380637  |
| C | -0.502768 | 2.949669  | 1.236732  |
| C | -2.668989 | 3.617358  | 0.124595  |
| C | -2.770728 | -3.730178 | -2.297306 |
| C | -4.194436 | -3.644464 | -1.726430 |
| C | -1.995833 | -4.890228 | -1.651437 |
| C | -2.913712 | -4.046324 | -3.796883 |
| O | 1.139452  | -0.868614 | 0.254555  |
| O | -0.652776 | 2.947606  | -1.789199 |
| O | -0.621291 | -3.024586 | 0.730886  |
| O | -2.028556 | -1.342300 | 2.680968  |
| O | -3.157665 | -0.513350 | 0.921981  |
| O | -3.030957 | 0.519551  | -1.151083 |
| O | -0.544632 | -0.106927 | -3.394377 |
| O | -2.136788 | 1.435654  | -3.774415 |
| O | -0.468216 | 3.767948  | 2.102018  |
| O | 0.598156  | 2.211121  | 0.883516  |
| H | -0.557186 | -0.008748 | 1.048604  |
| H | 1.148850  | 1.492650  | -0.960268 |
| H | 0.981376  | -0.843162 | -2.234684 |
| H | -0.378598 | -2.673916 | -3.621776 |
| H | 0.000946  | -3.051967 | -1.919683 |
| H | -2.564776 | -1.692992 | -2.874879 |
| H | -2.587572 | -3.208937 | 0.480472  |
| H | -4.183295 | -1.087979 | -0.766388 |
| H | -2.189427 | 1.698884  | 0.915430  |
| H | -3.641785 | 3.375645  | -0.283424 |
| H | -2.466736 | 4.619073  | 0.478762  |
| H | -4.223589 | -3.487899 | -0.643381 |
| H | -4.730274 | -4.577803 | -1.927617 |

|   |           |           |           |
|---|-----------|-----------|-----------|
| H | -4.757824 | -2.833439 | -2.203501 |
| H | -1.718665 | -4.715971 | -0.609428 |
| H | -1.070026 | -5.089698 | -2.201051 |
| H | -2.602496 | -5.801054 | -1.695929 |
| H | -3.485512 | -3.268645 | -4.315173 |
| H | -3.440533 | -4.997237 | -3.929031 |
| H | -1.940201 | -4.138643 | -4.287513 |
| H | 0.102354  | -2.369556 | 0.727880  |
| H | 1.684812  | -0.511467 | 0.974027  |
| H | -1.471664 | 3.314048  | -2.164260 |

#### C10H

|   |           |           |           |
|---|-----------|-----------|-----------|
| C | 0.062766  | -0.049342 | 0.041998  |
| C | 0.346493  | 1.458861  | -0.272979 |
| C | -0.974792 | 1.992038  | -0.869974 |
| C | -1.636143 | 0.767142  | -1.545041 |
| C | -0.873263 | -0.484214 | -1.110917 |
| C | -0.115865 | -0.932503 | -2.382688 |
| C | -0.563036 | -2.362843 | -2.616280 |
| C | -2.042972 | -2.350588 | -2.201170 |
| C | -1.999329 | -1.542191 | -0.872170 |
| C | -1.871845 | -2.290963 | 0.449981  |
| C | -2.411061 | -1.280656 | 1.449927  |
| C | -3.217041 | -0.628443 | -0.608233 |
| C | -1.461473 | 0.830825  | -3.066368 |
| C | -1.681650 | 2.519660  | 0.383828  |
| C | -0.507527 | 2.898030  | 1.279517  |
| C | -2.652518 | 3.669142  | 0.168792  |
| C | -2.754282 | -3.726250 | -2.264897 |
| C | -4.179312 | -3.638984 | -1.696010 |
| C | -1.952747 | -4.843975 | -1.575776 |
| C | -2.896892 | -4.108194 | -3.749132 |
| O | 1.252858  | -0.700569 | 0.108801  |
| O | -0.639092 | 3.017666  | -1.767308 |
| O | -0.575688 | -2.715373 | 0.749831  |
| O | -2.137538 | -1.231443 | 2.614963  |
| O | -3.248262 | -0.426959 | 0.823001  |
| O | -3.015534 | 0.586018  | -1.250920 |
| O | -0.579248 | -0.097488 | -3.464139 |
| O | -2.019866 | 1.593307  | -3.803110 |
| O | -0.497309 | 3.650646  | 2.203638  |
| O | 0.615380  | 2.213550  | 0.884221  |
| H | -0.441004 | -0.050869 | 1.020303  |
| H | 1.179383  | 1.564391  | -0.972985 |
| H | 0.965100  | -0.808949 | -2.307523 |
| H | -0.388590 | -2.676829 | -3.647762 |
| H | 0.010684  | -3.008110 | -1.940362 |
| H | -2.577296 | -1.705148 | -2.918524 |
| H | -2.575054 | -3.135383 | 0.468133  |
| H | -4.193782 | -1.009899 | -0.906606 |
| H | -2.201182 | 1.692491  | 0.886348  |
| H | -3.507889 | 3.335876  | -0.425295 |
| H | -2.156827 | 4.497920  | -0.341383 |
| H | -3.010743 | 4.028148  | 1.135716  |
| H | -4.215056 | -3.425760 | -0.622827 |
| H | -4.698076 | -4.590874 | -1.849125 |
| H | -4.756977 | -2.864532 | -2.214903 |
| H | -1.632347 | -4.603387 | -0.558862 |
| H | -1.049010 | -5.077982 | -2.147653 |
| H | -2.557023 | -5.756395 | -1.534720 |
| H | -3.486839 | -3.364492 | -4.296013 |
| H | -3.404847 | -5.074242 | -3.838923 |
| H | -1.923791 | -4.200815 | -4.240214 |
| H | -0.472137 | -2.674219 | 1.717595  |
| H | -1.397757 | 3.192780  | -2.350090 |

#### C3OH

|   |           |           |           |
|---|-----------|-----------|-----------|
| C | -0.021398 | -0.011821 | 0.093062  |
| C | 0.310799  | 1.431713  | -0.294183 |
| C | -1.041421 | 1.963435  | -0.903699 |
| C | -1.706875 | 0.694377  | -1.508271 |
| C | -0.896354 | -0.525371 | -1.053103 |
| C | -0.112344 | -0.955730 | -2.320486 |
| C | -0.571299 | -2.380833 | -2.584589 |
| C | -2.051982 | -2.370549 | -2.168097 |
| C | -1.996548 | -1.612989 | -0.812399 |
| C | -1.823822 | -2.418130 | 0.479840  |

|   |           |           |           |
|---|-----------|-----------|-----------|
| C | -2.284432 | -1.411957 | 1.537594  |
| C | -3.203346 | -0.719674 | -0.474951 |
| C | -1.572907 | 0.706824  | -3.037379 |
| C | -1.704731 | 2.561247  | 0.347493  |
| C | -0.509344 | 2.952040  | 1.209731  |
| C | -2.647791 | 3.726127  | 0.084360  |
| C | -2.779534 | -3.735156 | -2.287445 |
| C | -4.198853 | -3.654828 | -1.705250 |
| C | -1.997795 | -4.895440 | -1.650661 |
| C | -2.932265 | -4.046539 | -3.787002 |
| O | 1.114950  | -0.833198 | 0.272785  |
| O | -0.670706 | 2.903006  | -1.808460 |
| O | -0.602466 | -3.031826 | 0.719165  |
| O | -1.968108 | -1.342791 | 2.686433  |
| O | -3.137982 | -0.523691 | 0.949365  |
| O | -3.055509 | 0.503377  | -1.128344 |
| O | -0.547626 | -0.102232 | -3.391652 |
| O | -2.246761 | 1.312349  | -3.810580 |
| O | -0.471222 | 3.729584  | 2.109682  |
| O | 0.606005  | 2.240323  | 0.818139  |
| H | -0.587398 | 0.048955  | 1.031767  |
| H | 1.138083  | 1.480898  | -1.008979 |
| H | 0.969297  | -0.846555 | -2.227318 |
| H | -0.398388 | -2.667221 | -3.624218 |
| H | -0.008888 | -3.052910 | -1.925906 |
| H | -2.584060 | -1.696459 | -2.860857 |
| H | -2.572726 | -3.217620 | 0.497189  |
| H | -4.191818 | -1.110012 | -0.718904 |
| H | -2.240924 | 1.766391  | 0.884866  |
| H | -3.526268 | 3.378248  | -0.463712 |
| H | -2.144745 | 4.498692  | -0.501466 |
| H | -2.964779 | 4.158672  | 1.035514  |
| H | -4.219219 | -3.505597 | -0.620863 |
| H | -4.734964 | -4.587692 | -1.907844 |
| H | -4.767128 | -2.841615 | -2.172615 |
| H | -1.717780 | -4.725633 | -0.608639 |
| H | -1.073445 | -5.089345 | -2.204618 |
| H | -2.601731 | -5.807960 | -1.697229 |
| H | -3.509453 | -3.268463 | -4.298604 |
| H | -3.457735 | -4.998280 | -3.918512 |
| H | -1.961952 | -4.134859 | -4.284650 |
| H | 0.113356  | -2.369147 | 0.734068  |
| H | 1.641871  | -0.469663 | 1.003020  |

# C10OH

|   |           |           |           |
|---|-----------|-----------|-----------|
| C | 0.085033  | -0.012752 | 0.035984  |
| C | 0.336495  | 1.468226  | -0.264574 |
| C | -0.968473 | 2.014876  | -0.875608 |
| C | -1.633264 | 0.783650  | -1.540551 |
| C | -0.862179 | -0.462015 | -1.104827 |
| C | -0.112775 | -0.908507 | -2.384177 |
| C | -0.548933 | -2.345141 | -2.605618 |
| C | -2.025730 | -2.345088 | -2.181243 |
| C | -1.982639 | -1.524407 | -0.858347 |
| C | -1.836654 | -2.290402 | 0.457779  |
| C | -2.458124 | -1.282258 | 1.509451  |
| C | -3.202346 | -0.619824 | -0.600411 |
| C | -1.479161 | 0.839235  | -0.063658 |
| C | -1.686317 | 2.564069  | 0.361567  |
| C | -0.518064 | 2.934670  | 1.270294  |
| C | -2.641738 | 3.721851  | 0.126268  |
| C | -2.732854 | -3.724519 | -2.244174 |
| C | -4.150907 | -3.646401 | -1.658153 |
| C | -1.927988 | -4.850923 | -1.574488 |
| C | -2.887361 | -4.095681 | -3.730146 |
| O | 1.299260  | -0.706170 | 0.078434  |
| O | -0.623959 | 3.022644  | -1.791279 |
| O | -0.609148 | -2.671948 | 0.847800  |
| O | -2.303465 | -1.293890 | 2.684780  |
| O | -3.235638 | -0.421412 | 0.831855  |
| O | -3.012403 | 0.594012  | -1.235783 |
| O | -0.597187 | -0.089833 | -3.466495 |
| O | -2.055962 | 1.586561  | -3.800424 |
| O | -0.520115 | 3.698243  | 2.187894  |
| O | 0.592995  | 2.230831  | 0.904058  |
| H | -0.424954 | -0.058483 | 1.010193  |
| H | 1.181992  | 1.585235  | -0.949380 |

|   |           |           |           |
|---|-----------|-----------|-----------|
| H | 0.966905  | -0.772592 | -2.317357 |
| H | -0.377804 | -2.668205 | -3.634858 |
| H | 0.037332  | -2.983517 | -1.932486 |
| H | -2.566452 | -1.704382 | -2.897575 |
| H | -2.543937 | -3.133554 | 0.531001  |
| H | -4.178217 | -1.009535 | -0.891597 |
| H | -2.219606 | 1.746522  | 0.865529  |
| H | -3.494478 | 3.396759  | -0.476632 |
| H | -2.130106 | 4.542482  | -0.381789 |
| H | -3.007201 | 4.092550  | 1.086074  |
| H | -4.174028 | -3.432921 | -0.583995 |
| H | -4.666121 | -4.601404 | -1.802926 |
| H | -4.740457 | -2.875681 | -2.168746 |
| H | -1.668858 | -4.660000 | -0.529650 |
| H | -0.993879 | -5.036535 | -2.113971 |
| H | -2.508929 | -5.778712 | -1.602762 |
| H | -3.473907 | -3.342943 | -4.267969 |
| H | -3.404063 | -5.056494 | -3.824186 |
| H | -1.917994 | -4.192481 | -4.227819 |
| H | 1.114814  | -1.574979 | 0.470054  |
| H | -1.401033 | 3.237693  | -2.334278 |

# 1C

|   |           |           |           |
|---|-----------|-----------|-----------|
| C | 0.012250  | -0.016594 | 0.119105  |
| C | 0.333106  | 1.429579  | -0.261900 |
| C | -0.964754 | 1.965908  | -0.890065 |
| C | -1.635894 | 0.708943  | -1.509768 |
| C | -0.852051 | -0.523070 | -1.042733 |
| C | -0.060000 | -0.964852 | -2.286792 |
| C | -0.527993 | -2.393220 | -2.561396 |
| C | -2.028846 | -2.355848 | -2.184828 |
| C | -1.976426 | -1.600337 | -0.830756 |
| C | -1.825477 | -2.404756 | 0.465529  |
| C | -2.306923 | -1.396412 | 1.513476  |
| C | -3.176240 | -0.691177 | -0.516781 |
| C | -1.465890 | 0.729399  | -3.031424 |
| C | -1.674350 | 2.560035  | 0.331870  |
| C | -0.502911 | 2.951777  | 1.227769  |
| C | -2.619946 | 3.718659  | 0.060407  |
| C | -2.784060 | -3.708124 | -2.304766 |
| C | -4.184730 | -3.619877 | -1.676695 |
| C | -1.984605 | -4.876388 | -1.707144 |
| C | -3.005507 | -4.009977 | -3.799293 |
| O | 1.142401  | -0.848072 | 0.300686  |
| O | -0.612221 | 2.936940  | -1.840378 |
| O | -0.605018 | -3.011859 | 0.725242  |
| O | -2.025983 | -1.336615 | 2.671331  |
| O | -3.135712 | -0.495186 | 0.905762  |
| O | -3.000131 | 0.527288  | -1.175267 |
| O | -0.497536 | -0.141004 | -3.388446 |
| O | -2.070648 | 1.411104  | -3.805291 |
| O | -0.489854 | 3.738920  | 2.122603  |
| O | 0.611349  | 2.228695  | 0.876083  |
| O | -0.205087 | -2.823154 | -3.851771 |
| H | -0.565870 | 0.030076  | 1.051611  |
| H | 1.177690  | 1.491795  | -0.955754 |
| H | 1.022975  | -0.865269 | -2.207458 |
| H | -0.009402 | -3.056457 | -1.858859 |
| H | -2.527932 | -1.671867 | -2.894381 |
| H | -2.567140 | -3.209885 | 0.473447  |
| H | -4.164122 | -1.068389 | -0.781105 |
| H | -2.216790 | 1.761756  | 0.858142  |
| H | -3.472188 | 3.380150  | -0.535561 |
| H | -2.102195 | 4.522936  | -0.467485 |
| H | -2.988299 | 4.117455  | 1.007657  |
| H | -4.183577 | -3.464473 | -0.593578 |
| H | -4.725043 | -4.553808 | -1.862306 |
| H | -4.766363 | -2.811362 | -2.136015 |
| H | -1.666881 | -4.713706 | -0.673768 |
| H | -1.084190 | -5.062522 | -2.302105 |
| H | -2.591797 | -5.787317 | -1.737770 |
| H | -3.591139 | -3.216044 | -4.278063 |
| H | -3.565810 | -4.945351 | -3.904036 |
| H | -2.058072 | -4.114859 | -4.329606 |
| H | 0.110653  | -2.349068 | 0.762346  |
| H | 1.680099  | -0.477260 | 1.019171  |
| H | -1.399270 | 3.174648  | -2.358995 |

H -0.509340 -2.136197 -4.467904

### C1

C 0.066861 -0.014806 -0.011077  
C 0.323403 1.444802 -0.180445  
C -0.943919 1.965749 -0.877956  
C -1.571564 0.702404 -1.551023  
C -0.779936 -0.546315 -1.119457  
C -0.048965 -1.005002 -2.403901  
C -0.549772 -2.424363 -2.663611  
C -2.030120 -2.371375 -2.217170  
C -1.912205 -1.618525 -0.868659  
C -1.720046 -2.400123 0.434436  
C -2.038330 -1.312332 1.459697  
C -3.081723 -0.692878 -0.510918  
C -1.415681 0.758724 -3.071806  
C -1.744068 2.532142 0.302991  
C -0.672420 2.844073 1.338231  
C -2.630888 3.727077 -0.007600  
C -2.808367 -3.713558 -2.301231  
C -4.186410 -3.594544 -1.630690  
C -2.015015 -4.887522 -1.708734  
C -3.078512 -4.029199 -3.784502  
O 0.979668 -0.795307 0.626371  
O -0.552105 2.940925 -1.807920  
O -0.524824 -3.079043 0.619722  
O -1.599204 -1.177863 2.560720  
O -2.943388 -0.453654 0.901212  
O -2.937366 0.493744 -1.228052  
O -0.512922 -0.161141 -3.477098  
O -1.990879 1.496540 -3.817082  
O -0.747070 3.569553 2.281208  
O 0.465075 2.125644 1.061962  
O -0.291917 -2.848701 -3.971070  
H 1.222354 1.660462 -0.775395  
H 1.038945 -0.921964 -2.369019  
H -0.007572 -3.098579 -1.990430  
H -2.551595 -1.679920 -2.903254  
H -2.522358 -3.141269 0.523567  
H -4.088054 -1.066978 -0.698075  
H -2.346523 1.729022 0.743802  
H -3.434865 3.435492 -0.689860  
H -2.049565 4.535096 -0.457875  
H -3.073845 4.100372 0.917885  
H -4.143518 -3.438119 -0.548639  
H -4.751645 -4.517568 -1.795550  
H -4.765903 -2.774659 -2.072382  
H -1.688684 -4.724235 -0.678330  
H -1.122088 -5.087379 -2.310390  
H -2.633079 -5.791467 -1.730555  
H -3.655984 -3.226270 -4.258363  
H -3.666395 -4.950282 -3.860506  
H -2.149608 -4.166192 -4.339468  
H 0.152482 -2.445515 0.915782  
H 1.354216 -0.281423 1.364266  
H -1.314946 3.171646 -2.364761  
H -0.626983 -2.159766 -4.568615

### C2

C 0.039484 -0.117667 0.177959  
C 0.155483 1.369415 0.018877  
C -0.971833 1.947958 -0.796339  
C -1.649802 0.698919 -1.424361  
C -0.850954 -0.543368 -1.006508  
C -0.087919 -0.944572 -2.282645  
C -0.544025 -2.373245 -2.575215  
C -2.038743 -2.358037 -2.170154  
C -1.966701 -1.631112 -0.801436  
C -1.784843 -2.467855 0.470230  
C -2.282727 -1.508563 1.559337  
C -3.164536 -0.736509 -0.439999  
C -1.517666 0.760916 -2.948333  
C -1.762298 2.693137 0.290834  
C -0.655685 3.058862 1.272593  
C -2.583862 3.886759 -0.162253  
C -2.785077 -3.713642 -2.305739

C -4.173169 -3.652240 -1.646976  
C -1.962931 -4.889141 -1.754634  
C -3.035937 -3.981922 -3.802064  
O 1.241633 -0.873694 0.159051  
O -0.434191 2.822024 -1.761961  
O -0.548581 -3.058559 0.701095  
O -2.026446 -1.511374 2.724317  
O -3.102697 -0.578156 0.984937  
O -3.004019 0.502481 -1.062000  
O -0.576995 -0.111651 -3.355948  
O -2.130435 1.479705 -3.683068  
O -0.603305 3.935494 2.071016  
O 0.377265 2.124731 1.135570  
O -0.243719 -2.775984 -3.879867  
H -0.458214 -0.282219 1.145485  
H 0.992878 -0.819511 -2.231380  
H -0.004671 -3.044978 -1.896743  
H -2.555929 -1.663846 -2.855918  
H -2.505673 -3.291243 0.461478  
H -4.154908 -1.110337 -0.700616  
H -2.399993 1.963312 0.810875  
H -3.371248 3.562372 -0.849043  
H -1.949718 4.624792 -0.659266  
H -3.048592 4.367482 0.701051  
H -4.151838 -3.520514 -0.560887  
H -4.709409 -4.586517 -1.842445  
H -4.770827 -2.838880 -2.076244  
H -1.622206 -4.749087 -0.725233  
H -1.075065 -5.052776 -2.374565  
H -2.563202 -5.804348 -1.793281  
H -3.638753 -3.182293 -4.248958  
H -3.589887 -4.919843 -3.917475  
H -2.098996 -4.065066 -4.354408  
H 0.173591 -2.403717 0.673195  
H 1.839832 -0.516660 0.834417  
H -1.157656 3.134156 -2.332653  
H -0.565664 -2.079477 -4.475952

### C6

C 0.022516 -0.025071 0.070107  
C 0.339381 1.427385 -0.285460  
C -0.967744 1.983076 -0.878269  
C -1.638812 0.747148 -1.536929  
C -0.873562 -0.502103 -1.082234  
C -0.155335 -0.958856 -2.330999  
C -0.515252 -2.399054 -2.587276  
C -2.030599 -2.376510 -2.195209  
C -2.000320 -1.579934 -0.859708  
C -1.863841 -2.353341 0.457087  
C -2.362085 -1.324089 1.475940  
C -3.203644 -0.659690 -0.582148  
C -1.430879 0.798812 -3.055853  
C -1.662464 2.533061 0.372047  
C -0.476387 2.905156 1.258592  
C -2.617377 3.695553 0.153946  
C -2.772852 -3.737706 -2.283792  
C -4.182904 -3.635876 -1.677492  
C -1.973360 -4.880655 -1.639665  
C -2.974409 -4.088519 -3.770403  
O 1.147714 -0.868349 0.203039  
O -0.624453 2.990316 -1.793498  
O -0.649988 -2.959260 0.744427  
O -2.100697 -1.233580 2.635922  
O -3.193990 -0.446429 0.835998  
O -3.012319 0.555829 -1.248441  
O -0.503469 -0.143870 -3.408807  
O -1.966195 1.518562 -3.840116  
O -0.453387 3.666665 2.175167  
O 0.635775 2.202143 0.864958  
O -0.211518 -2.843614 -3.874004  
H -0.535250 0.000612 1.016597  
H 1.172527 1.497405 -0.992052  
H 0.020005 -3.039900 -1.877331  
H -2.527034 -1.715035 -2.928291  
H -2.607694 -3.156495 0.473803  
H -4.187042 -1.034630 -0.866497  
H -2.193387 1.717403 0.882703

|   |           |           |           |
|---|-----------|-----------|-----------|
| H | -3.478427 | 3.373559  | -0.438485 |
| H | -2.111830 | 4.520321  | -0.353888 |
| H | -2.971517 | 4.060496  | 1.120062  |
| H | -4.199019 | -3.442611 | -0.600772 |
| H | -4.715421 | -4.578846 | -1.838370 |
| H | -4.762024 | -2.847206 | -2.173176 |
| H | -1.671599 | -4.685100 | -0.607535 |
| H | -1.062814 | -5.076582 | -2.215927 |
| H | -2.572495 | -5.797304 | -1.653199 |
| H | -3.555009 | -3.311716 | -4.282424 |
| H | -3.532705 | -5.027467 | -3.850705 |
| H | -2.020807 | -4.208442 | -4.285803 |
| H | 0.083457  | -2.315418 | 0.712153  |
| H | 1.709327  | -0.515610 | 0.912357  |
| H | -1.418575 | 3.262422  | -2.282831 |
| H | -0.496875 | -2.156078 | -4.497866 |

# C7

|   |           |           |           |
|---|-----------|-----------|-----------|
| C | 0.021682  | -0.023036 | 0.045772  |
| C | 0.328656  | 1.434435  | -0.301539 |
| C | -0.982375 | 1.985862  | -0.885582 |
| C | -1.657484 | 0.747493  | -1.539220 |
| C | -0.881731 | -0.502003 | -1.100700 |
| C | -0.112889 | -0.940386 | -2.363531 |
| C | -0.678677 | -2.277887 | -2.667941 |
| C | -2.112315 | -2.330592 | -2.217603 |
| C | -2.011110 | -1.566374 | -0.866375 |
| C | -1.848415 | -2.360556 | 0.434666  |
| C | -2.322128 | -1.342544 | 1.479157  |
| C | -3.203594 | -0.648811 | -0.549578 |
| C | -1.466870 | 0.821220  | -3.058213 |
| C | -1.669379 | 2.535207  | 0.370155  |
| C | -0.479606 | 2.908798  | 1.249485  |
| C | -2.629234 | 3.694140  | 0.156525  |
| C | -2.819862 | -3.712667 | -2.296889 |
| C | -4.210244 | -3.652218 | -1.643429 |
| C | -1.964744 | -4.835181 | -1.692006 |
| C | -3.065561 | -4.042587 | -3.781893 |
| O | 1.161519  | -0.854322 | 0.161082  |
| O | -0.652084 | 2.996267  | -1.802511 |
| O | -0.633119 | -2.972257 | 0.694891  |
| O | -2.038515 | -1.273016 | 2.635631  |
| O | -3.159998 | -0.448737 | 0.870593  |
| O | -3.023836 | 0.565170  | -1.215171 |
| O | -0.467889 | -0.000195 | -3.427922 |
| O | -2.074579 | 1.529154  | -3.808359 |
| O | -0.448755 | 3.670625  | 2.165638  |
| O | 0.630457  | 2.202306  | 0.851901  |
| O | -0.282743 | -2.962381 | -3.765830 |
| H | -0.521915 | -0.010698 | 0.999456  |
| H | 1.157059  | 1.517945  | -1.012600 |
| H | 0.975470  | -0.901235 | -2.270180 |
| H | -2.702330 | -1.667736 | -2.887607 |
| H | -2.595864 | -3.159788 | 0.459048  |
| H | -4.193086 | -1.024865 | -0.812293 |
| H | -2.193787 | 1.718242  | 0.885334  |
| H | -3.493235 | 3.366305  | -0.428149 |
| H | -2.130062 | 4.516644  | -0.360769 |
| H | -2.976646 | 4.061934  | 1.124065  |
| H | -4.196078 | -3.468794 | -0.565215 |
| H | -4.722620 | -4.607621 | -1.795422 |
| H | -4.825844 | -2.874693 | -2.112008 |
| H | -1.687296 | -4.665239 | -0.649469 |
| H | -1.036766 | -4.948177 | -2.260891 |
| H | -2.512905 | -5.781685 | -1.751606 |
| H | -3.678442 | -3.269151 | -4.258979 |
| H | -3.606859 | -4.991779 | -3.857458 |
| H | -2.133127 | -4.135225 | -4.339633 |
| H | 0.105662  | -2.344131 | 0.590264  |
| H | 1.702311  | -0.524995 | 0.897106  |
| H | -1.439352 | 3.218650  | -2.327814 |
| H | 0.586846  | -2.646671 | -4.055535 |

# C8

|   |           |          |           |
|---|-----------|----------|-----------|
| C | 0.024877  | 0.015646 | 0.167449  |
| C | 0.315112  | 1.447243 | -0.288358 |
| C | -0.997522 | 1.922533 | -0.937308 |

|   |           |           |           |
|---|-----------|-----------|-----------|
| C | -1.652069 | 0.620660  | -1.477957 |
| C | -0.821243 | -0.562526 | -0.971049 |
| C | -0.017494 | -1.014070 | -2.205853 |
| C | -0.425642 | -2.471295 | -2.436979 |
| C | -1.871516 | -2.500434 | -1.974215 |
| C | -1.909756 | -1.664790 | -0.722738 |
| C | -1.734409 | -2.445616 | 0.598712  |
| C | -2.220250 | -1.420932 | 1.625484  |
| C | -3.136211 | -0.780968 | -0.413717 |
| C | -1.521824 | 0.563600  | -3.001086 |
| C | -1.711242 | 2.570469  | 0.254621  |
| C | -0.544250 | 3.030259  | 1.122992  |
| C | -2.679205 | 3.695162  | -0.074320 |
| C | -2.791233 | -3.647416 | -2.336451 |
| C | -4.167340 | -3.563656 | -1.659671 |
| C | -2.098076 | -4.968172 | -1.938076 |
| C | -3.047001 | -3.661123 | -3.858465 |
| O | 1.169018  | -0.783657 | 0.396677  |
| O | -0.671460 | 2.842443  | -1.946105 |
| O | -0.497087 | -3.019640 | 0.838600  |
| O | -1.914739 | -1.319678 | 2.774679  |
| O | -3.071204 | -0.551316 | 1.005794  |
| O | -2.999962 | 0.426956  | -1.094391 |
| O | -0.500664 | -0.255033 | -3.332132 |
| O | -2.181908 | 1.165356  | -3.795374 |
| O | -0.542644 | 3.864055  | 1.974778  |
| O | 0.581362  | 2.309830  | 0.805343  |
| O | -0.140708 | -2.908684 | -3.734793 |
| H | -0.561409 | 0.098673  | 1.092410  |
| H | 1.155406  | 1.491604  | -0.988638 |
| H | 1.060266  | -0.863422 | -2.138489 |
| H | 0.171869  | -3.101711 | -1.758148 |
| H | -2.459618 | -3.267985 | 0.613170  |
| H | -4.119130 | -1.185042 | -0.644369 |
| H | -2.236753 | 1.791319  | 0.825058  |
| H | -3.526810 | 3.309673  | -0.648064 |
| H | -2.178344 | 4.479831  | -0.646286 |
| H | -3.052205 | 4.137256  | 0.851631  |
| H | -4.117948 | -3.526665 | -0.566588 |
| H | -4.746634 | -4.454204 | -1.922440 |
| H | -4.730869 | -2.694123 | -2.014567 |
| H | -1.875199 | -5.003542 | -0.865678 |
| H | -1.158533 | -5.087096 | -2.486498 |
| H | -2.745103 | -5.817479 | -2.183578 |
| H | -3.438552 | -2.693905 | -4.193354 |
| H | -3.792114 | -4.428715 | -4.094846 |
| H | -2.136156 | -3.887012 | -4.413182 |
| H | 0.191841  | -2.330152 | 0.897290  |
| H | 1.695668  | -0.366366 | 1.097542  |
| H | -1.471259 | 3.046748  | -2.459397 |
| H | -0.507885 | -2.245317 | -4.342696 |

# C8tBu

|   |           |           |           |
|---|-----------|-----------|-----------|
| C | 0.010198  | -0.008676 | 0.122685  |
| C | 0.352037  | 1.435572  | -0.246745 |
| C | -0.932110 | 1.989406  | -0.888950 |
| C | -1.611099 | 0.743275  | -1.521960 |
| C | -0.845850 | -0.499483 | -1.050535 |
| C | -0.049699 | -0.947339 | -2.291749 |
| C | -0.526108 | -2.372610 | -2.566645 |
| C | -2.023840 | -2.331408 | -2.188384 |
| C | -1.981276 | -1.561628 | -0.845986 |
| C | -1.874924 | -2.372070 | 0.449883  |
| C | -2.362527 | -1.361683 | 1.490723  |
| C | -3.179428 | -0.643421 | -0.553573 |
| C | -1.427938 | 0.767092  | -3.041814 |
| C | -1.649862 | 2.587103  | 0.326424  |
| C | -0.485510 | 2.961195  | 1.238819  |
| C | -2.578197 | 3.757904  | 0.047754  |
| C | -2.763367 | -3.701653 | -2.254973 |
| C | -4.075313 | -3.631865 | -1.524354 |
| C | -1.897049 | -4.852839 | -1.719784 |
| C | -3.088862 | -4.003677 | -3.737514 |
| O | 1.125747  | -0.857023 | 0.314667  |
| O | -0.556336 | 2.959639  | -1.831274 |
| O | -0.670575 | -2.999230 | 0.739323  |
| O | -2.102373 | -1.306734 | 2.653790  |

|   |           |           |           |
|---|-----------|-----------|-----------|
| O | -3.165050 | -0.446859 | 0.868374  |
| O | -2.981485 | 0.575232  | -1.206406 |
| O | -0.475233 | -0.121700 | -3.396043 |
| O | -2.014474 | 1.462148  | -3.817784 |
| O | -0.474401 | 3.744929  | 2.136696  |
| O | 0.624709  | 2.226723  | 0.898138  |
| O | -0.217314 | -2.812001 | -3.857637 |
| H | -0.581228 | 0.039413  | 1.047198  |
| H | 1.205840  | 1.491903  | -0.929794 |
| H | 1.033596  | -0.855283 | -2.205826 |
| H | -0.007973 | -3.035599 | -1.863837 |
| H | -2.530327 | -1.669450 | -2.912674 |
| H | -2.640354 | -3.158368 | 0.419575  |
| H | -4.162298 | -1.019553 | -0.836702 |
| H | -2.208538 | 1.793206  | 0.842290  |
| H | -3.426565 | 3.431781  | -0.560526 |
| H | -2.044351 | 4.558236  | -0.470031 |
| H | -2.954106 | 4.157062  | 0.991873  |
| H | -4.416149 | -4.477785 | -0.936457 |
| H | -4.839838 | -2.944893 | -1.877251 |
| H | -1.519889 | -4.678219 | -0.708245 |
| H | -1.036061 | -5.014849 | -2.376062 |
| H | -2.485249 | -5.776240 | -1.715013 |
| H | -3.734120 | -3.226746 | -1.62448  |
| H | -3.618649 | -4.958642 | -3.810936 |
| H | -2.172148 | -4.064554 | -4.328871 |
| H | 0.054274  | -2.347538 | 0.787042  |
| H | 1.662868  | -0.493580 | 1.037331  |
| H | -1.334391 | 3.208733  | -2.358051 |
| H | -0.505485 | -2.117841 | -4.473448 |

#### C10

|   |           |           |           |
|---|-----------|-----------|-----------|
| C | 0.009858  | -0.085400 | -0.010739 |
| C | 0.409204  | 1.363478  | -0.297317 |
| C | -0.877544 | 2.029044  | -0.838550 |
| C | -1.706340 | 0.852404  | -1.432241 |
| C | -0.930385 | -0.427769 | -1.156510 |
| C | -0.243333 | -0.770230 | -2.479795 |
| C | -0.564988 | -2.244013 | -2.721852 |
| C | -2.020945 | -2.385727 | -2.228435 |
| C | -2.045649 | -1.499666 | -0.933943 |
| C | -1.991069 | -2.100594 | 0.425283  |
| C | -3.115932 | -1.680562 | 1.239608  |
| C | -3.353663 | -0.647633 | -0.798650 |
| C | -1.752799 | 0.930396  | -2.965612 |
| C | -1.459618 | 2.661034  | 0.429688  |
| C | -0.223514 | 2.889269  | 1.291702  |
| C | -2.286234 | 3.921342  | 0.232618  |
| C | -2.619218 | -3.814456 | -2.180474 |
| C | -4.019186 | -3.768028 | -1.551334 |
| C | -1.735335 | -4.803782 | -1.410781 |
| C | -2.779388 | -4.334289 | -3.619920 |
| O | 1.067917  | -1.026369 | 0.021521  |
| O | -0.493741 | 2.970772  | -1.806105 |
| O | -0.951821 | -2.703306 | 1.003251  |
| O | -3.363463 | -1.914946 | 2.390100  |
| O | -3.947205 | -0.910002 | 0.439101  |
| O | -2.980958 | 0.720988  | -0.858390 |
| O | -0.905597 | 0.014865  | -3.492954 |
| O | -2.424725 | 1.669291  | -3.622190 |
| O | -0.096641 | 3.630438  | 2.216539  |
| O | 0.791626  | 2.065919  | 0.872608  |
| O | -0.313723 | -2.638492 | -4.039532 |
| H | -0.542096 | -0.099065 | 0.942385  |
| H | 1.223947  | 1.423061  | -1.025850 |
| H | 0.825104  | -0.551155 | -2.526139 |
| H | 0.106812  | -2.832640 | -2.083310 |
| H | -2.634825 | -1.832891 | -2.959893 |
| H | -4.091017 | -0.852858 | -1.579214 |
| H | -2.065729 | 1.907556  | 0.950834  |
| H | -3.192600 | 3.694890  | -0.336338 |
| H | -1.706969 | 4.685313  | -0.291609 |
| H | -2.574184 | 4.323992  | 1.205621  |
| H | -4.003169 | -3.459922 | -0.501815 |
| H | -4.473936 | -4.763171 | -1.590201 |
| H | -4.678154 | -3.086199 | -2.102625 |
| H | -1.592853 | -4.522099 | -0.364582 |

|   |           |           |           |
|---|-----------|-----------|-----------|
| H | -0.753242 | -4.910229 | -1.884762 |
| H | -2.206783 | -5.792094 | -1.422323 |
| H | -3.398075 | -3.653929 | -4.217638 |
| H | -3.281098 | -5.307571 | -3.600856 |
| H | -1.815673 | -4.449196 | -4.118785 |
| H | -0.129242 | -2.532381 | 0.501515  |
| H | 1.672365  | -0.790425 | 0.743614  |
| H | -1.291922 | 3.334211  | -2.225652 |
| H | -0.788802 | -2.021585 | -4.620529 |

#### C12

|   |           |           |           |
|---|-----------|-----------|-----------|
| C | 0.032215  | -0.011756 | 0.117277  |
| C | 0.333382  | 1.440108  | -0.256844 |
| C | -0.965029 | 1.957627  | -0.900786 |
| C | -1.615029 | 0.689105  | -1.520371 |
| C | -0.808672 | -0.531125 | -1.051324 |
| C | -0.025623 | -0.973912 | -2.299048 |
| C | -0.498738 | -2.405294 | -2.567972 |
| C | -1.993846 | -2.357172 | -2.178220 |
| C | -1.924835 | -1.617019 | -0.817439 |
| C | -1.782711 | -2.431748 | 0.474689  |
| C | -2.355780 | -1.474061 | 1.527313  |
| C | -3.086474 | -0.708858 | -0.493029 |
| C | -1.456870 | 0.705326  | -3.040382 |
| C | -1.694123 | 2.549004  | 0.311942  |
| C | -0.537116 | 2.956440  | 1.219630  |
| C | -2.651131 | 3.694659  | 0.026052  |
| C | -2.787156 | -3.683154 | -2.294119 |
| C | -4.171683 | -3.535749 | -1.640498 |
| C | -2.010101 | -4.878207 | -1.720525 |
| C | -3.041194 | -3.966619 | -3.786698 |
| O | 1.171538  | -0.824550 | 0.313983  |
| O | -0.616025 | 2.926840  | -1.852921 |
| O | -0.554898 | -3.002578 | 0.773364  |
| O | -2.161777 | -1.434652 | 2.700012  |
| O | -3.194497 | -0.576124 | 0.887625  |
| O | -2.982741 | 0.488531  | -1.146310 |
| O | -0.476196 | -0.151597 | -3.398058 |
| O | -2.071609 | 1.380061  | -3.812218 |
| O | -0.542963 | 3.745604  | 2.112367  |
| O | 0.588166  | 2.242722  | 0.883655  |
| O | -0.191015 | -2.837325 | -3.861058 |
| H | -0.567893 | 0.018995  | 1.039918  |
| H | 1.183924  | 1.513689  | -0.942280 |
| H | 1.057973  | -0.872056 | -2.230760 |
| H | 0.025995  | -3.070295 | -1.870936 |
| H | -2.492035 | -1.658016 | -2.872093 |
| H | -2.496194 | -3.260097 | 0.440475  |
| H | -2.233281 | 1.747782  | 0.837290  |
| H | -3.493348 | 3.343386  | -0.576694 |
| H | -2.137698 | 4.503213  | -0.499480 |
| H | -3.033850 | 4.092479  | 0.967955  |
| H | -4.146942 | -3.425449 | -0.552552 |
| H | -4.775160 | -4.422868 | -1.859405 |
| H | -4.698072 | -2.663501 | -2.045600 |
| H | -1.654842 | -4.729419 | -0.696921 |
| H | -1.133517 | -5.090567 | -2.342200 |
| H | -2.646356 | -5.769493 | -1.732529 |
| H | -3.623243 | -3.158706 | -4.245732 |
| H | -3.617709 | -4.892084 | -3.890657 |
| H | -2.104943 | -4.081476 | -4.335444 |
| H | 0.151663  | -2.329499 | 0.780957  |
| H | 1.702556  | -0.439105 | 1.029840  |
| H | -1.403011 | 3.158965  | -2.374383 |
| H | -0.511055 | -2.156310 | -4.475759 |

#### C14

|   |           |           |           |
|---|-----------|-----------|-----------|
| C | 0.080211  | 0.019883  | 0.057254  |
| C | 0.445192  | 1.458647  | -0.321998 |
| C | -0.832072 | 2.011563  | -0.985143 |
| C | -1.514289 | 0.765874  | -1.612858 |
| C | -0.786595 | -0.482112 | -1.101753 |
| C | 0.003678  | -0.992362 | -2.319037 |
| C | -0.513508 | -2.410443 | -2.554330 |
| C | -2.016405 | -2.308340 | -2.198841 |
| C | -1.955877 | -1.507380 | -0.871240 |
| C | -1.861123 | -2.261428 | 0.459580  |

|   |           |           |           |
|---|-----------|-----------|-----------|
| C | -2.323969 | -1.192159 | 1.457520  |
| C | -3.123907 | -0.541331 | -0.615382 |
| C | -1.298696 | 0.753033  | -3.130070 |
| C | -1.502747 | 2.631000  | 0.202561  |
| C | -0.480630 | 2.855798  | 1.224543  |
| C | -2.871828 | 3.181300  | 0.299835  |
| C | -2.817526 | -3.636704 | -2.281750 |
| C | -4.223807 | -3.474524 | -1.681938 |
| C | -2.070258 | -4.807813 | -1.625245 |
| C | -3.025593 | -3.988207 | -3.767207 |
| O | 1.184991  | -0.838143 | 0.266256  |
| O | -0.471373 | 2.987204  | -1.940055 |
| O | -0.670713 | -2.904425 | 0.769214  |
| O | -2.078003 | -1.109041 | 2.621326  |
| O | -3.088625 | -0.273020 | 0.793537  |
| O | -2.896141 | 0.632063  | -1.334378 |
| O | -0.385178 | -0.185312 | -3.451359 |
| O | -1.841330 | 1.459862  | -3.928102 |
| O | -0.566720 | 3.481007  | 2.246742  |
| O | 0.691999  | 2.229422  | 0.841794  |
| O | -0.189597 | -2.894644 | -3.825205 |
| H | -0.508166 | 0.097130  | 0.980708  |
| H | 1.314076  | 1.512830  | -0.984713 |
| H | 1.088399  | -0.931091 | -2.225764 |
| H | -0.026842 | -3.067409 | -1.823522 |
| H | -2.481434 | -1.631756 | -2.938207 |
| H | -2.633428 | -3.036862 | 0.485980  |
| H | -4.122027 | -0.895054 | -0.874676 |
| H | -3.577429 | 2.392003  | 0.586478  |
| H | -3.208585 | 3.583214  | -0.661415 |
| H | -2.899795 | 3.965389  | 1.060335  |
| H | -4.233801 | -3.278926 | -0.605498 |
| H | -4.795141 | -4.394571 | -1.842234 |
| H | -4.767928 | -2.663245 | -2.180738 |
| H | -1.763877 | -4.615021 | -0.593587 |
| H | -1.167484 | -5.048976 | -2.196422 |
| H | -2.708918 | -5.697481 | -1.630859 |
| H | -3.573928 | -3.192900 | -4.286261 |
| H | -3.618214 | -4.906040 | -3.845867 |
| H | -2.074368 | -4.147803 | -4.276554 |
| H | 0.074225  | -2.273915 | 0.777131  |
| H | 1.719332  | -0.470156 | 0.988974  |
| H | -1.234993 | 3.166877  | -2.514716 |
| H | -0.466132 | -2.221552 | -4.468997 |

#### C14Me

|   |           |           |           |
|---|-----------|-----------|-----------|
| C | -0.003859 | -0.027679 | 0.140040  |
| C | 0.310292  | 1.419068  | -0.241090 |
| C | -0.985331 | 1.946329  | -0.874193 |
| C | -1.657114 | 0.691534  | -1.491782 |
| C | -0.862843 | -0.534755 | -1.026996 |
| C | -0.063671 | -0.961251 | -2.272396 |
| C | -0.527010 | -2.388971 | -2.561627 |
| C | -2.028333 | -2.362193 | -2.184696 |
| C | -1.979310 | -1.620895 | -0.822677 |
| C | -1.820840 | -2.437480 | 0.465107  |
| C | -2.302008 | -1.440888 | 1.524251  |
| C | -3.183329 | -0.721437 | -0.496132 |
| C | -1.497792 | 0.712475  | -3.014824 |
| C | -1.704380 | 2.540529  | 0.353420  |
| C | -0.522651 | 2.975381  | 1.218930  |
| C | -2.673847 | 3.627432  | 0.068313  |
| C | -2.777295 | -3.716646 | -2.318827 |
| C | -4.177625 | -3.642077 | -1.688302 |
| C | -1.972114 | -4.887757 | -1.734620 |
| C | -2.998585 | -4.002829 | -3.816366 |
| O | 1.129955  | -0.854506 | 0.320208  |
| O | -0.635949 | 2.924040  | -1.811862 |
| O | -0.596442 | -3.040661 | 0.715464  |
| O | -2.014648 | -1.389366 | 2.681072  |
| O | -3.136225 | -0.536703 | 0.928662  |
| O | -3.017418 | 0.504355  | -1.143056 |
| O | -0.496864 | -0.128802 | -3.367308 |
| O | -2.132942 | 1.356803  | -3.792764 |
| O | -0.500309 | 3.806754  | 2.071840  |
| O | 0.581808  | 2.231360  | 0.891032  |
| O | -0.203498 | -2.802828 | -3.857043 |

|   |           |           |           |
|---|-----------|-----------|-----------|
| H | -0.583076 | 0.013553  | 1.071980  |
| H | 1.156400  | 1.483189  | -0.933170 |
| H | 1.018709  | -0.861306 | -2.185648 |
| H | -0.006099 | -3.058393 | -1.866742 |
| H | -2.530931 | -1.673497 | -2.887146 |
| H | -2.558702 | -3.246154 | 0.467564  |
| H | -4.170338 | -1.102794 | -0.757789 |
| H | -2.205888 | 1.720058  | 0.893630  |
| H | -3.639895 | 3.379599  | -0.352320 |
| H | -2.488460 | 4.627068  | 0.437828  |
| H | -4.175611 | -3.500058 | -0.603298 |
| H | -4.714209 | -4.575949 | -1.884744 |
| H | -4.763225 | -2.830421 | -2.136929 |
| H | -1.654200 | -4.734819 | -0.699785 |
| H | -1.071411 | -5.063554 | -2.332256 |
| H | -2.575371 | -5.800956 | -1.774511 |
| H | -3.589889 | -3.207220 | -4.285217 |
| H | -3.552795 | -4.940682 | -3.931174 |
| H | -2.051014 | -4.094904 | -4.348785 |
| H | 0.114418  | -2.373109 | 0.759384  |
| H | 1.662004  | -0.488914 | 1.045397  |
| H | -1.450382 | 3.337787  | -2.145384 |
| H | -0.501353 | -2.104090 | -4.463186 |

#### C10H

|   |           |           |           |
|---|-----------|-----------|-----------|
| C | 0.038410  | -0.022949 | 0.133278  |
| C | 0.347070  | 1.435475  | -0.247768 |
| C | -0.952742 | 1.967376  | -0.885443 |
| C | -1.629742 | 0.716578  | -1.503588 |
| C | -0.852043 | -0.525081 | -1.056990 |
| C | -0.065353 | -0.959385 | -2.308657 |
| C | -0.529981 | -2.390411 | -2.576535 |
| C | -2.028699 | -2.355329 | -2.190296 |
| C | -1.970024 | -1.598263 | -0.835399 |
| C | -1.821880 | -2.409618 | 0.459785  |
| C | -2.311496 | -1.413035 | 1.511686  |
| C | -3.171019 | -0.690678 | -0.515254 |
| C | -1.478151 | 0.739341  | -3.028260 |
| C | -1.672486 | 2.565714  | 0.326760  |
| C | -0.507248 | 2.964738  | 1.225505  |
| C | -2.619832 | 3.719805  | 0.042655  |
| C | -2.782716 | -3.709167 | -2.304356 |
| C | -4.182568 | -3.621169 | -1.673761 |
| C | -1.979705 | -4.876632 | -1.709658 |
| C | -3.008532 | -4.012802 | -3.798174 |
| O | 1.115061  | -0.857035 | 0.237978  |
| O | -0.589750 | 2.931395  | -1.838039 |
| O | -0.600143 | -3.014581 | 0.719399  |
| O | -2.029908 | -1.365826 | 2.669702  |
| O | -3.137916 | -0.509011 | 0.908831  |
| O | -2.990855 | 0.534910  | -1.158535 |
| O | -0.522028 | -0.137569 | -3.401662 |
| O | -2.091413 | 1.425779  | -3.789865 |
| O | -0.499863 | 3.763057  | 2.110154  |
| O | 0.604773  | 2.234911  | 0.889067  |
| O | -0.214190 | -2.820559 | -3.867571 |
| H | -0.544689 | -0.013541 | 1.067468  |
| H | 1.198042  | 1.497589  | -0.932616 |
| H | 1.017629  | -0.851074 | -2.244885 |
| H | -0.004615 | -3.050296 | -1.875769 |
| H | -2.533784 | -1.673150 | -2.897115 |
| H | -2.561022 | -3.216327 | 0.450377  |
| H | -4.157069 | -1.065893 | -0.788820 |
| H | -2.214635 | 1.768077  | 0.854309  |
| H | -3.464607 | 3.378567  | -0.562479 |
| H | -2.099150 | 4.526754  | -0.478500 |
| H | -2.999789 | 4.118256  | 0.985379  |
| H | -4.182408 | -3.462514 | -0.591061 |
| H | -4.721211 | -4.556633 | -1.855837 |
| H | -4.766404 | -2.815519 | -2.135301 |
| H | -1.662073 | -4.718983 | -0.675410 |
| H | -1.079175 | -5.059389 | -2.305348 |
| H | -2.584887 | -5.788706 | -1.742736 |
| H | -3.593552 | -3.218464 | -4.276941 |
| H | -3.571588 | -4.946797 | -3.899270 |
| H | -2.063085 | -4.121875 | -4.331018 |
| H | 0.070023  | -2.356407 | 0.975161  |



|   |           |           |           |
|---|-----------|-----------|-----------|
| H | -1.379784 | 3.199604  | -2.336886 |
| H | -0.530985 | -2.140292 | -4.484868 |

### C3OH

|   |           |           |           |
|---|-----------|-----------|-----------|
| C | -0.011151 | -0.008320 | 0.138185  |
| C | 0.341728  | 1.428444  | -0.257617 |
| C | -0.991854 | 1.963988  | -0.904399 |
| C | -1.659157 | 0.692773  | -1.502859 |
| C | -0.859712 | -0.526682 | -1.026737 |
| C | -0.052851 | -0.959012 | -2.264930 |
| C | -0.526097 | -2.384045 | -2.557621 |
| C | -2.027882 | -2.350414 | -2.181201 |
| C | -1.975367 | -1.612455 | -0.817584 |
| C | -1.813810 | -2.431950 | 0.467904  |
| C | -2.276832 | -1.430349 | 1.529799  |
| C | -3.175009 | -0.710723 | -0.482185 |
| C | -1.509750 | 0.686807  | -3.029882 |
| C | -1.676689 | 2.585789  | 0.323623  |
| C | -0.497223 | 2.976058  | 1.207664  |
| C | -2.602570 | 3.755743  | 0.024631  |
| C | -2.783191 | -3.701268 | -2.317224 |
| C | -4.182015 | -3.621156 | -1.684229 |
| C | -1.983458 | -4.877657 | -1.736398 |
| C | -3.007364 | -3.982363 | -3.815272 |
| O | 1.115428  | -0.833589 | 0.351395  |
| O | -0.595938 | 2.884699  | -1.817050 |
| O | -0.591949 | -3.044061 | 0.709050  |
| O | -1.968809 | -1.374420 | 2.681370  |
| O | -3.112896 | -0.523505 | 0.942481  |
| O | -3.010641 | 0.513934  | -1.131295 |
| O | -0.467544 | -0.122027 | -3.360277 |
| O | -2.177847 | 1.266117  | -3.825798 |
| O | -0.472245 | 3.764575  | 2.098179  |
| O | 0.618852  | 2.247443  | 0.851073  |
| O | -0.204647 | -2.794947 | -3.853950 |
| H | -0.600398 | 0.066334  | 1.061189  |
| H | 1.185650  | 1.461655  | -0.953590 |
| H | 1.029955  | -0.871318 | -2.167702 |
| H | -0.010173 | -3.059354 | -1.864767 |
| H | -2.528571 | -1.659117 | -2.882291 |
| H | -2.558204 | -3.234581 | 0.474139  |
| H | -4.165471 | -1.089469 | -0.733829 |
| H | -2.231665 | 1.802305  | 0.858705  |
| H | -3.473052 | 3.409250  | -0.536898 |
| H | -2.079839 | 4.515764  | -0.560372 |
| H | -2.934951 | 4.203941  | 0.963192  |
| H | -4.177013 | -3.484473 | -0.598449 |
| H | -4.724361 | -4.550981 | -1.883879 |
| H | -4.763677 | -2.804096 | -2.128076 |
| H | -1.666209 | -4.729866 | -0.700579 |
| H | -1.083003 | -5.055659 | -2.333725 |
| H | -2.590865 | -5.787907 | -1.779907 |
| H | -3.596572 | -3.183476 | -4.281035 |
| H | -3.564711 | -4.918098 | -3.931933 |
| H | -2.060750 | -4.075849 | -4.349165 |
| H | 0.117502  | -2.377036 | 0.768774  |
| H | 1.621358  | -0.475940 | 1.099230  |
| H | -0.490911 | -2.088399 | -4.456891 |

### C7OH

|   |           |           |           |
|---|-----------|-----------|-----------|
| C | 0.017074  | -0.018901 | 0.104881  |
| C | 0.335150  | 1.430122  | -0.267620 |
| C | -0.965252 | 1.969457  | -0.889853 |
| C | -1.635068 | 0.715711  | -1.516613 |
| C | -0.852776 | -0.518561 | -1.054922 |
| C | -0.069021 | -0.954354 | -2.313222 |
| C | -0.501194 | -2.411442 | -2.533251 |
| C | -2.033872 | -2.361815 | -2.179810 |
| C | -1.972422 | -1.593550 | -0.834221 |
| C | -1.826811 | -2.395487 | 0.465117  |
| C | -2.314923 | -1.384958 | 1.507451  |
| C | -3.178216 | -0.685851 | -0.529168 |
| C | -1.464762 | 0.741024  | -3.038850 |
| C | -1.672880 | 2.554684  | 0.338013  |
| C | -0.500131 | 2.940607  | 1.234720  |
| C | -2.619191 | 3.714719  | 0.075450  |
| C | -2.780623 | -3.713350 | -2.304774 |

|   |           |           |           |
|---|-----------|-----------|-----------|
| C | -4.183604 | -3.623091 | -1.679340 |
| C | -1.981502 | -4.879731 | -1.704428 |
| C | -2.998201 | -4.004041 | -3.800623 |
| O | 1.146753  | -0.853554 | 0.277104  |
| O | -0.616142 | 2.948572  | -1.832157 |
| O | -0.608566 | -3.002835 | 0.733359  |
| O | -2.038028 | -1.321497 | 2.665846  |
| O | -3.145458 | -0.490528 | 0.893534  |
| O | -3.001342 | 0.530798  | -1.186381 |
| O | -0.523685 | -0.148017 | -3.405528 |
| O | -2.056945 | 1.449124  | -3.799809 |
| O | -0.485079 | 3.721287  | 2.135013  |
| O | 0.614630  | 2.220790  | 0.875520  |
| O | -0.293749 | -2.893172 | -3.780274 |
| H | -0.557070 | 0.022282  | 1.040334  |
| H | 1.177734  | 1.499004  | -0.963251 |
| H | 1.013057  | -0.839833 | -2.233410 |
| H | -0.026930 | -3.043268 | -1.761103 |
| H | -2.493232 | -1.682816 | -2.914910 |
| H | -2.569035 | -3.200130 | 0.471003  |
| H | -4.163791 | -1.066485 | -0.797487 |
| H | -2.213846 | 1.753254  | 0.861022  |
| H | -3.473747 | 3.378807  | -0.518547 |
| H | -2.102956 | 4.519490  | -0.452791 |
| H | -2.983282 | 4.109930  | 1.025873  |
| H | -4.183276 | -3.471461 | -0.595909 |
| H | -4.721995 | -4.556797 | -1.869492 |
| H | -4.764275 | -2.814095 | -2.138234 |
| H | -1.682827 | -4.723294 | -0.664425 |
| H | -1.071068 | -5.050376 | -2.288774 |
| H | -2.580813 | -5.794715 | -1.753228 |
| H | -3.598180 | -3.217949 | -4.272190 |
| H | -3.535028 | -4.951698 | -3.915604 |
| H | -2.050844 | -4.085143 | -4.339171 |
| H | 0.108399  | -2.341013 | 0.771382  |
| H | 1.696534  | -0.478612 | 0.984388  |
| H | -1.392042 | 3.154659  | -2.380743 |

### C10OH

|   |           |           |           |
|---|-----------|-----------|-----------|
| C | 0.054603  | -0.057690 | 0.068483  |
| C | 0.337848  | 1.421493  | -0.231196 |
| C | -0.946608 | 1.979639  | -0.871323 |
| C | -1.611795 | 0.748092  | -1.541247 |
| C | -0.850847 | -0.499538 | -1.091362 |
| C | -0.077455 | -0.949681 | -2.344254 |
| C | -0.535346 | -2.383709 | -2.592748 |
| C | -2.031772 | -2.358095 | -2.199014 |
| C | -1.983069 | -1.561675 | -0.870129 |
| C | -1.829922 | -2.307125 | 0.463804  |
| C | -2.430162 | -1.326221 | 1.487031  |
| C | -3.193131 | -0.646501 | -0.597954 |
| C | -1.437145 | 0.793532  | -3.062535 |
| C | -1.683472 | 2.541923  | 0.348925  |
| C | -0.533855 | 2.899512  | 1.285230  |
| C | -2.618854 | 3.711114  | 0.089065  |
| C | -2.769859 | -3.722613 | -2.273618 |
| C | -4.154241 | -3.646557 | -1.608505 |
| C | -1.933581 | -4.867764 | -1.680508 |
| C | -3.025268 | -4.057592 | -3.755395 |
| O | 1.197851  | -0.872685 | 0.107948  |
| O | -0.572809 | 2.975114  | -1.788830 |
| O | -0.603607 | -2.803342 | 0.777946  |
| O | -2.251060 | -1.298870 | 2.664358  |
| O | -3.225355 | -0.444579 | 0.825185  |
| O | -2.989591 | 0.567022  | -1.246573 |
| O | -0.537030 | -0.137043 | -3.444592 |
| O | -2.003764 | 1.524811  | -3.820045 |
| O | -0.543239 | 3.662332  | 2.202249  |
| O | 0.579256  | 2.177594  | 0.945751  |
| O | -0.233564 | -2.834015 | -3.881827 |
| H | -0.480830 | -0.096232 | 1.028014  |
| H | 1.198363  | 1.526080  | -0.899470 |
| H | 1.005072  | -0.843434 | -2.278213 |
| H | 0.006390  | -3.025026 | -1.887333 |
| H | -2.544348 | -1.696950 | -2.920102 |
| H | -2.486482 | -3.196692 | 0.474507  |
| H | -4.168806 | -1.026025 | -0.902217 |

|   |           |           |           |
|---|-----------|-----------|-----------|
| H | -2.239394 | 1.731676  | 0.841022  |
| H | -3.459901 | 3.393964  | -0.534074 |
| H | -2.086248 | 4.526494  | -0.406002 |
| H | -3.004876 | 4.086206  | 1.038990  |
| H | -4.132252 | -3.443234 | -0.532361 |
| H | -4.674288 | -4.601052 | -1.738555 |
| H | -4.770444 | -2.873600 | -2.082919 |
| H | -1.590048 | -4.685478 | -0.658115 |
| H | -1.045838 | -5.047341 | -2.295447 |
| H | -2.523982 | -5.789892 | -1.676156 |
| H | -3.640012 | -3.284646 | -4.231356 |
| H | -3.567379 | -5.006533 | -3.829322 |
| H | -2.089312 | -4.149905 | -4.308051 |
| H | 1.616286  | -0.784634 | 0.976489  |
| H | -1.347328 | 3.222572  | -2.321465 |
| H | -0.531840 | -2.148428 | -4.502538 |

# **IJ**

|   |           |           |           |
|---|-----------|-----------|-----------|
| C | 0.082834  | -0.035390 | 0.056742  |
| C | 0.354564  | 1.437053  | -0.272906 |
| C | -0.950627 | 1.975524  | -0.895369 |
| C | -1.616227 | 0.735171  | -1.538854 |
| C | -0.832419 | -0.505189 | -1.086984 |
| C | -0.079386 | -0.946954 | -2.355183 |
| C | -0.540569 | -2.377805 | -2.619013 |
| C | -2.032654 | -2.348496 | -2.211738 |
| C | -1.961282 | -1.575463 | -0.866658 |
| C | -1.817364 | -2.353556 | 0.434877  |
| C | -2.334804 | -1.358175 | 1.462655  |
| C | -3.171892 | -0.665382 | -0.567383 |
| C | -1.469658 | 0.773763  | -3.061439 |
| C | -1.669322 | 2.541786  | 0.332846  |
| C | -0.503494 | 2.930719  | 1.235946  |
| C | -2.628657 | 3.692781  | 0.079163  |
| C | -2.774835 | -3.709976 | -2.296659 |
| C | -4.168935 | -3.626940 | -1.652234 |
| C | -1.948562 | -4.855466 | -1.689406 |
| C | -3.014158 | -4.045591 | -3.781165 |
| O | -0.602680 | 2.967239  | -1.828339 |
| O | -0.518013 | -2.787411 | 0.713788  |
| O | -2.047603 | -1.343144 | 2.625399  |
| O | -3.164860 | -0.476874 | 0.866324  |
| O | -2.987222 | 0.549510  | -1.211126 |
| O | -0.541556 | -0.129706 | -3.449397 |
| O | -2.066531 | 1.479372  | -3.819681 |
| O | -0.506847 | 3.709505  | 2.140827  |
| O | 0.610400  | 2.224679  | 0.881543  |
| O | -0.243705 | -2.808095 | -3.916316 |
| H | -0.410068 | -0.072686 | 1.032616  |
| H | 1.189540  | 1.572316  | -0.966757 |
| H | 1.006287  | -0.838901 | -2.305855 |
| H | -0.000935 | -3.037861 | -1.929148 |
| H | -2.550077 | -1.676628 | -2.919099 |
| H | -2.518872 | -3.198545 | 0.447311  |
| H | -4.155385 | -1.046283 | -0.842168 |
| H | -2.200034 | 1.729527  | 0.847720  |
| H | -3.477953 | 3.355790  | -0.522106 |
| H | -2.119728 | 4.510972  | -0.436076 |
| H | -2.999648 | 4.073960  | 1.032683  |
| H | -4.159681 | -3.441554 | -0.573869 |
| H | -4.697710 | -4.572970 | -1.807367 |
| H | -4.767355 | -2.839598 | -2.126239 |
| H | -1.589509 | -4.655485 | -0.675472 |
| H | -1.071338 | -5.060198 | -2.312067 |
| H | -2.551499 | -5.769189 | -1.661191 |
| H | -3.619295 | -3.270076 | -4.265526 |
| H | -3.561735 | -4.991196 | -3.858617 |
| H | -2.073713 | -4.145162 | -4.324453 |
| H | -0.423624 | -2.789695 | 1.683232  |
| H | -1.393234 | 3.217746  | -2.334854 |
| H | -0.552573 | -2.115933 | -4.524495 |
| H | 0.990003  | -0.636744 | 0.137102  |

# **C1**

|   |           |           |           |
|---|-----------|-----------|-----------|
| C | 0.091660  | -0.054100 | -0.031295 |
| C | 0.307697  | 1.419622  | -0.136003 |
| C | -0.941584 | 1.970498  | -0.866122 |

|   |           |           |           |
|---|-----------|-----------|-----------|
| C | -1.582058 | 0.731928  | -1.560548 |
| C | -0.794787 | -0.519938 | -1.140396 |
| C | -0.079506 | -0.968609 | -2.439671 |
| C | -0.565877 | -2.392611 | -2.696997 |
| C | -2.040288 | -2.360330 | -2.230711 |
| C | -1.917575 | -1.594274 | -0.888788 |
| C | -1.718986 | -2.351756 | 0.416081  |
| C | -2.114475 | -1.298750 | 1.441020  |
| C | -3.102555 | -0.671782 | -0.542599 |
| C | -1.441105 | 0.807867  | -3.080607 |
| C | -1.761496 | 2.555581  | 0.288344  |
| C | -0.710672 | 2.839813  | 1.352149  |
| C | -2.610661 | 3.770980  | -0.046526 |
| C | -2.792351 | -3.717634 | -2.287740 |
| C | -4.163808 | -3.619388 | -1.599537 |
| C | -1.959030 | -4.863641 | -1.693103 |
| C | -3.077634 | -4.060732 | -3.761876 |
| O | -0.501076 | 2.937089  | -1.786206 |
| O | -0.429032 | -2.849128 | 0.622817  |
| O | -1.731461 | -1.242458 | 2.572572  |
| O | -2.997073 | -0.439510 | 0.879364  |
| O | -2.952655 | 0.516366  | -1.244013 |
| O | -0.565554 | -0.130897 | -3.506260 |
| O | -2.008063 | 1.563641  | -3.813593 |
| O | -0.799633 | 3.576230  | 2.287914  |
| O | 0.402431  | 2.087206  | 1.118032  |
| O | -0.323989 | -2.811117 | -4.009713 |
| H | 1.211204  | 1.675250  | -0.706884 |
| H | 1.007611  | -0.872931 | -2.418977 |
| H | -0.002317 | -3.062448 | -2.036639 |
| H | -2.581197 | -1.682422 | -2.914522 |
| H | -2.462395 | -3.157019 | 0.499100  |
| H | -4.103671 | -1.052243 | -0.744446 |
| H | -2.396152 | 1.768486  | 0.711689  |
| H | -3.398926 | 3.502768  | -0.756637 |
| H | -1.996052 | 4.567705  | -0.472387 |
| H | -3.073968 | 4.151652  | 0.865864  |
| H | -4.113452 | -3.438857 | -0.521502 |
| H | -4.709154 | -4.558362 | -1.739434 |
| H | -4.767787 | -2.822614 | -2.050320 |
| H | -1.581723 | -4.659283 | -0.686805 |
| H | -1.094478 | -5.075791 | -2.330864 |
| H | -2.565420 | -5.774495 | -1.649554 |
| H | -3.687865 | -3.281837 | -4.234429 |
| H | -3.637704 | -5.000554 | -3.816646 |
| H | -2.154514 | -4.174322 | -4.331412 |
| H | -0.277224 | -2.834484 | 1.585168  |
| H | -1.253903 | 3.217405  | -2.333462 |
| H | -0.658464 | -2.114688 | -4.599019 |
| H | 0.734616  | -0.709300 | 0.539083  |

# **C2**

|   |           |           |           |
|---|-----------|-----------|-----------|
| C | 0.151454  | -0.127540 | 0.092932  |
| C | 0.098016  | 1.368438  | 0.090151  |
| C | -0.980213 | 1.954941  | -0.778570 |
| C | -1.626744 | 0.711351  | -1.443495 |
| C | -0.805712 | -0.535552 | -1.056729 |
| C | -0.108403 | -0.933874 | -2.369949 |
| C | -0.565043 | -2.362185 | -2.654267 |
| C | -2.041770 | -2.354809 | -2.191735 |
| C | -1.921297 | -1.625149 | -0.826488 |
| C | -1.731971 | -2.447097 | 0.440709  |
| C | -2.189733 | -1.478468 | 1.523724  |
| C | -3.117913 | -0.732648 | -0.444495 |
| C | -1.526471 | 0.805188  | -2.966557 |
| C | -1.828499 | 2.713489  | 0.251838  |
| C | -0.807111 | 3.004894  | 1.345001  |
| C | -2.553500 | 3.954201  | -0.239389 |
| C | -2.784082 | -3.715059 | -2.295879 |
| C | -4.156747 | -3.656825 | -1.604327 |
| C | -1.938543 | -4.878588 | -1.754015 |
| C | -3.071982 | -4.001715 | -3.782117 |
| O | -0.382901 | 2.810288  | -1.732384 |
| O | -0.431103 | -2.917224 | 0.643521  |
| O | -1.866797 | -1.517493 | 2.676504  |
| O | -3.015625 | -0.554581 | 0.987725  |
| O | -2.983705 | 0.486687  | -1.085542 |

|   |           |           |           |
|---|-----------|-----------|-----------|
| O | -0.634320 | -0.098282 | -3.421324 |
| O | -2.132260 | 1.556174  | -3.674446 |
| O | -0.820172 | 3.850551  | 2.181747  |
| O | 0.207628  | 2.061995  | 1.265539  |
| O | -0.313987 | -2.755164 | -3.973054 |
| H | -0.153305 | -0.492180 | 1.077530  |
| H | 0.975444  | -0.806120 | -2.369167 |
| H | 0.004663  | -3.036034 | -2.003031 |
| H | -2.586827 | -1.662491 | -2.856839 |
| H | -2.449712 | -3.278610 | 0.454316  |
| H | -4.113911 | -1.119673 | -0.660138 |
| H | -2.540604 | 2.005154  | 0.696371  |
| H | -3.294364 | 3.684710  | -0.998573 |
| H | -1.846650 | 4.671427  | -0.663597 |
| H | -3.066531 | 4.438326  | 0.594151  |
| H | -4.112394 | -3.518234 | -0.519873 |
| H | -4.692868 | -4.594707 | -1.782187 |
| H | -4.767798 | -2.849053 | -2.025007 |
| H | -1.555251 | -4.715259 | -0.742553 |
| H | -1.076489 | -5.055509 | -2.405736 |
| H | -2.537449 | -5.795420 | -1.745761 |
| H | -3.692286 | -3.210944 | -4.220542 |
| H | -3.622452 | -4.944477 | -3.872503 |
| H | -2.149952 | -4.083006 | -4.358818 |
| H | -0.305083 | -2.996618 | 1.605919  |
| H | -1.083043 | 3.155867  | -2.312802 |
| H | -0.651756 | -2.050030 | -4.550139 |
| H | 1.154379  | -0.536283 | -0.073331 |

# C6

|   |           |           |           |
|---|-----------|-----------|-----------|
| C | 0.103514  | -0.044310 | -0.006252 |
| C | 0.365084  | 1.435791  | -0.305024 |
| C | -0.952515 | 1.990562  | -0.886539 |
| C | -1.615305 | 0.771565  | -1.570508 |
| C | -0.849647 | -0.486973 | -1.133425 |
| C | -0.175388 | -0.943492 | -2.405825 |
| C | -0.533916 | -2.383843 | -2.656895 |
| C | -2.037385 | -2.369639 | -2.226239 |
| C | -1.983127 | -1.556322 | -0.899419 |
| C | -1.856057 | -2.303286 | 0.422300  |
| C | -2.379437 | -1.281578 | 1.418689  |
| C | -3.195541 | -0.634235 | -0.636513 |
| C | -1.428381 | 0.843757  | -3.090385 |
| C | -1.654889 | 2.505432  | 0.373081  |
| C | -0.473686 | 2.875682  | 1.265405  |
| C | -2.628493 | 3.656358  | 0.179642  |
| C | -2.766138 | -3.739377 | -2.275859 |
| C | -4.169859 | -3.641775 | -1.652984 |
| C | -1.938392 | -4.856790 | -1.620575 |
| C | -2.985820 | -4.127577 | -3.750564 |
| O | -0.620491 | 3.022768  | -1.780276 |
| O | -0.565065 | -2.744538 | 0.721857  |
| O | -2.097596 | -1.227130 | 2.581276  |
| O | -3.216642 | -0.426665 | 0.792547  |
| O | -2.995794 | 0.576379  | -1.289920 |
| O | -0.541896 | -0.128012 | -3.474986 |
| O | -1.953449 | 1.588109  | -3.858486 |
| O | -0.467692 | 3.624481  | 2.195338  |
| O | 0.639065  | 2.194520  | 0.865104  |
| O | -0.262819 | -2.823905 | -3.953336 |
| H | -0.360279 | -0.111534 | 0.982334  |
| H | 1.187081  | 1.587277  | -1.010285 |
| H | 0.024154  | -3.024969 | -1.964640 |
| H | -2.556412 | -1.720625 | -2.954274 |
| H | -2.565995 | -3.140985 | 0.446760  |
| H | -4.175190 | -1.012600 | -0.928711 |
| H | -2.169288 | 1.672963  | 0.871142  |
| H | -3.487963 | 3.334256  | -0.415233 |
| H | -2.136893 | 4.497525  | -0.315096 |
| H | -2.982188 | 3.999760  | 1.153853  |
| H | -4.178516 | -3.417187 | -0.582284 |
| H | -4.691073 | -4.595974 | -1.781637 |
| H | -4.765458 | -2.875613 | -2.163980 |
| H | -1.592332 | -4.621339 | -0.610069 |
| H | -1.052169 | -5.074270 | -2.226038 |
| H | -2.533880 | -5.774455 | -1.570513 |
| H | -3.586625 | -3.371254 | -4.269592 |

|   |           |           |           |
|---|-----------|-----------|-----------|
| H | -3.530881 | -5.076449 | -3.800358 |
| H | -2.039267 | -4.242798 | -4.279456 |
| H | -0.473464 | -2.717317 | 1.691146  |
| H | -1.418899 | 3.300938  | -2.258433 |
| H | -0.549107 | -2.126135 | -4.565405 |
| H | 1.011914  | -0.647173 | 0.020961  |

# C7

|   |           |           |           |
|---|-----------|-----------|-----------|
| C | 0.077975  | -0.042444 | -0.009610 |
| C | 0.352179  | 1.433608  | -0.316965 |
| C | -0.964179 | 1.989514  | -0.896342 |
| C | -1.639553 | 0.767021  | -1.566987 |
| C | -0.863862 | -0.490209 | -1.142248 |
| C | -0.131712 | -0.925589 | -2.428284 |
| C | -0.703130 | -2.258823 | -2.738099 |
| C | -2.122610 | -2.322573 | -2.248234 |
| C | -1.996946 | -1.547278 | -0.903488 |
| C | -1.837657 | -2.320405 | 0.399764  |
| C | -2.349367 | -1.321781 | 1.428015  |
| C | -3.199466 | -0.629767 | -0.596122 |
| C | -1.471533 | 0.858403  | -3.085938 |
| C | -1.656716 | 2.519446  | 0.363198  |
| C | -0.469784 | 2.889016  | 1.247251  |
| C | -2.624430 | 3.674036  | 0.163256  |
| C | -2.809356 | -3.716139 | -2.292666 |
| C | -4.187342 | -3.671312 | -1.610637 |
| C | -1.912057 | -4.810179 | -1.694886 |
| C | -3.085024 | -4.076795 | -3.765209 |
| O | -0.635147 | 3.014110  | -1.800287 |
| O | -0.537460 | -2.752085 | 0.672436  |
| O | -2.053302 | -1.301570 | 2.588623  |
| O | -3.187337 | -0.444143 | 0.836927  |
| O | -3.010978 | 0.583798  | -1.241874 |
| O | -0.496246 | 0.018386  | -3.483297 |
| O | -2.077811 | 1.581543  | -3.822339 |
| O | -0.452164 | 3.644853  | 2.171373  |
| O | 0.637409  | 2.196063  | 0.847771  |
| O | -0.342478 | -2.920044 | -3.863413 |
| H | -0.397659 | -0.092241 | 0.974094  |
| H | 1.171553  | 1.579741  | -1.027116 |
| H | 0.960396  | -0.890679 | -2.360876 |
| H | -2.738370 | -1.673459 | -2.907947 |
| H | -2.538259 | -3.164946 | 0.424121  |
| H | -4.185364 | -1.007774 | -0.869111 |
| H | -2.173678 | 1.693815  | 0.870094  |
| H | -3.487337 | 3.349968  | -0.425418 |
| H | -2.130042 | 4.506154  | -0.343508 |
| H | -2.972443 | 4.029171  | 1.135358  |
| H | -4.160450 | -3.458555 | -0.538196 |
| H | -4.681699 | -4.640819 | -1.729571 |
| H | -4.828221 | -2.919606 | -2.087169 |
| H | -1.576604 | -4.600123 | -0.676102 |
| H | -1.015817 | -4.934593 | -2.310336 |
| H | -2.450456 | -5.764016 | -1.687397 |
| H | -3.723340 | -3.322633 | -4.239525 |
| H | -3.611062 | -5.036521 | -3.810857 |
| H | -2.165371 | -4.162112 | -4.344446 |
| H | -0.440690 | -2.747705 | 1.641634  |
| H | -1.428557 | 3.258521  | -2.305491 |
| H | 0.490124  | -2.559888 | -4.205399 |
| H | 0.980163  | -0.653405 | 0.046191  |

# C8

|   |           |           |           |
|---|-----------|-----------|-----------|
| C | 0.104737  | 0.004321  | 0.107033  |
| C | 0.336264  | 1.466170  | -0.294763 |
| C | -0.983967 | 1.938275  | -0.940617 |
| C | -1.625306 | 0.649721  | -1.510016 |
| C | -0.794091 | -0.541105 | -1.013864 |
| C | -0.029024 | -0.999125 | -2.271224 |
| C | -0.428452 | -2.459724 | -2.486666 |
| C | -1.862832 | -2.495873 | -1.992269 |
| C | -1.885877 | -1.637431 | -0.752139 |
| C | -1.721142 | -2.381253 | 0.578362  |
| C | -2.263263 | -1.372875 | 1.578352  |
| C | -3.128517 | -0.754593 | -0.471326 |
| C | -1.512474 | 0.611815  | -3.034140 |
| C | -1.712540 | 2.552976  | 0.258219  |

|   |           |           |           |
|---|-----------|-----------|-----------|
| C | -0.555366 | 3.015536  | 1.136748  |
| C | -2.699445 | 3.665680  | -0.053525 |
| C | -2.781778 | -3.652870 | -2.326285 |
| C | -4.147669 | -3.576763 | -1.627184 |
| C | -2.071268 | -4.964993 | -1.929960 |
| C | -3.064852 | -3.684369 | -3.843452 |
| O | -0.664150 | 2.883282  | -1.930366 |
| O | -0.407633 | -2.765112 | 0.854517  |
| O | -1.967778 | -1.312992 | 2.737820  |
| O | -3.111243 | -0.527009 | 0.958664  |
| O | -2.981682 | 0.447681  | -1.141855 |
| O | -0.536359 | -0.251500 | -3.392267 |
| O | -2.159501 | 1.244412  | -3.815110 |
| O | -0.575552 | 3.840316  | 1.999743  |
| O | 0.573673  | 2.316803  | 0.817982  |
| O | -0.170536 | -2.903573 | -3.788621 |
| H | -0.391410 | -0.000389 | 1.082386  |
| H | 1.166282  | 1.588358  | -0.996980 |
| H | 1.050581  | -0.839545 | -2.233968 |
| H | 0.191158  | -3.083327 | -1.821155 |
| H | -2.394537 | -3.251838 | 0.595182  |
| H | -4.103643 | -1.165926 | -0.720271 |
| H | -2.222950 | 1.755978  | 0.816016  |
| H | -3.540920 | 3.277188  | -0.634439 |
| H | -2.210880 | 4.467611  | -0.612303 |
| H | -3.078705 | 4.087845  | 0.879227  |
| H | -4.082562 | -3.510456 | -0.536243 |
| H | -4.714742 | -4.483793 | -1.858359 |
| H | -4.733647 | -2.727728 | -1.994614 |
| H | -1.836650 | -4.993316 | -0.859481 |
| H | -1.137485 | -5.078781 | -2.489166 |
| H | -2.712969 | -5.822015 | -2.161946 |
| H | -3.465861 | -2.722176 | -4.181220 |
| H | -3.811709 | -4.456819 | -4.057496 |
| H | -2.163393 | -3.912420 | -4.412240 |
| H | -0.298963 | -2.726233 | 1.821528  |
| H | -1.465808 | 3.094022  | -2.437584 |
| H | -0.545966 | -2.239489 | -4.390933 |
| H | 1.028276  | -0.566853 | 0.216934  |

#### C8tBu

|   |           |           |           |
|---|-----------|-----------|-----------|
| C | 0.082849  | -0.030728 | 0.056558  |
| C | 0.374394  | 1.441142  | -0.258077 |
| C | -0.917149 | 1.999374  | -0.892417 |
| C | -1.590740 | 0.771892  | -1.551768 |
| C | -0.826932 | -0.481459 | -1.098213 |
| C | -0.072524 | -0.927535 | -2.366190 |
| C | -0.542021 | -2.355091 | -2.630078 |
| C | -2.030410 | -2.323845 | -2.218307 |
| C | -1.968582 | -1.535353 | -0.885336 |
| C | -1.872607 | -2.320603 | 0.415584  |
| C | -2.391440 | -1.320710 | 1.435398  |
| C | -3.175974 | -0.614150 | -0.607491 |
| C | -1.431815 | 0.817087  | -3.072783 |
| C | -1.643509 | 2.566745  | 0.330720  |
| C | -0.484257 | 2.934809  | 1.250720  |
| C | -2.584956 | 3.731520  | 0.072888  |
| C | -2.751659 | -3.704093 | -2.245249 |
| C | -4.058198 | -3.635963 | -1.504617 |
| C | -1.859702 | -4.826690 | -1.690325 |
| C | -3.088745 | -4.051357 | -3.715508 |
| O | -0.545756 | 2.992355  | -1.815083 |
| O | -0.591515 | -2.785451 | 0.728473  |
| O | -2.122992 | -1.310077 | 2.602933  |
| O | -3.194626 | -0.424672 | 0.825078  |
| O | -2.968310 | 0.600815  | -1.244535 |
| O | -0.525139 | -0.107487 | -3.461434 |
| O | -2.007598 | 1.540496  | -3.830532 |
| O | -0.488978 | 3.707498  | 2.160832  |
| O | 0.625123  | 2.217301  | 0.905199  |
| O | -0.261004 | -2.794540 | -3.928165 |
| H | -0.422189 | -0.071946 | 1.026266  |
| H | 1.219019  | 1.572473  | -0.940945 |
| H | 1.013821  | -0.826701 | -2.312495 |
| H | -0.001136 | -3.014588 | -1.941135 |
| H | -2.558475 | -1.677214 | -2.940384 |
| H | -2.605872 | -3.142269 | 0.390062  |

|   |           |           |           |
|---|-----------|-----------|-----------|
| H | -4.155251 | -0.991615 | -0.900405 |
| H | -2.191047 | 1.758073  | 0.833507  |
| H | -3.430897 | 3.409180  | -0.541009 |
| H | -2.059407 | 4.546499  | -0.430637 |
| H | -2.962954 | 4.111117  | 1.024283  |
| H | -4.398816 | -4.489710 | -0.927720 |
| H | -4.825737 | -2.950830 | -1.854541 |
| H | -1.451013 | -4.608112 | -0.698855 |
| H | -1.017967 | -5.009521 | -2.365622 |
| H | -2.437743 | -5.754235 | -1.626353 |
| H | -3.751066 | -3.295979 | -4.152513 |
| H | -3.604583 | -5.015905 | -3.757008 |
| H | -2.178344 | -4.112638 | -4.316124 |
| H | -0.520531 | -2.780351 | 1.699980  |
| H | -1.327069 | 3.254948  | -2.329758 |
| H | -0.556639 | -2.096462 | -4.536152 |
| H | 0.982176  | -0.643378 | 0.142215  |

#### C10

|   |           |           |           |
|---|-----------|-----------|-----------|
| C | 0.098657  | -0.034970 | -0.004444 |
| C | 0.387608  | 1.444821  | -0.282077 |
| C | -0.909606 | 2.011825  | -0.900912 |
| C | -1.590787 | 0.795635  | -1.574379 |
| C | -0.811201 | -0.456325 | -1.164524 |
| C | -0.090901 | -0.894937 | -2.448934 |
| C | -0.531887 | -2.339183 | -2.685119 |
| C | -2.009318 | -2.347101 | -2.235839 |
| C | -1.943476 | -1.526303 | -0.917067 |
| C | -1.805762 | -2.173672 | 0.404143  |
| C | -2.566482 | -1.448687 | 1.394329  |
| C | -3.184946 | -0.628947 | -0.660139 |
| C | -1.468137 | 0.858791  | -3.099750 |
| C | -1.632694 | 2.551447  | 0.336965  |
| C | -0.473459 | 2.898148  | 1.264579  |
| C | -2.575918 | 3.720578  | 0.107171  |
| C | -2.719132 | -3.728569 | -2.249971 |
| C | -4.043432 | -3.673955 | -1.475522 |
| C | -1.831880 | -4.840203 | -1.674942 |
| C | -3.054783 | -4.088498 | -3.707624 |
| O | -0.545159 | 3.019578  | -1.808834 |
| O | -0.782966 | -2.941264 | 0.783148  |
| O | -2.504236 | -1.597897 | 2.592684  |
| O | -3.339305 | -0.516239 | 0.761869  |
| O | -2.957079 | 0.618834  | -1.233943 |
| O | -0.601501 | -0.089267 | -3.527620 |
| O | -2.043610 | 1.607407  | -3.832263 |
| O | -0.476970 | 3.646337  | 2.194508  |
| O | 0.637719  | 2.190818  | 0.899519  |
| O | -0.269956 | -2.782363 | -3.984975 |
| H | -0.423923 | -0.100397 | 0.956989  |
| H | 1.230302  | 1.594536  | -0.963235 |
| H | 0.994552  | -0.769159 | -2.432543 |
| H | 0.046879  | -2.979282 | -2.007394 |
| H | -2.562414 | -1.707057 | -2.945677 |
| H | -4.123894 | -1.013754 | -1.058479 |
| H | -2.181043 | 1.729957  | 0.819086  |
| H | -3.422867 | 3.410090  | -0.511262 |
| H | -2.052247 | 4.546587  | -0.380079 |
| H | -2.952266 | 4.078669  | 1.067474  |
| H | -3.903040 | -3.437498 | -0.414611 |
| H | -4.538626 | -4.648945 | -1.529160 |
| H | -4.730245 | -2.938727 | -1.911181 |
| H | -1.514888 | -4.638067 | -0.648513 |
| H | -0.939104 | -4.986770 | -2.291889 |
| H | -2.388123 | -5.783486 | -1.675355 |
| H | -3.710401 | -3.333837 | -4.158040 |
| H | -3.582287 | -5.047921 | -3.737717 |
| H | -2.150865 | -4.172759 | -4.313769 |
| H | -0.836586 | -3.016517 | 1.758349  |
| H | -1.329210 | 3.286666  | -2.317197 |
| H | -0.624575 | -2.112442 | -4.593045 |
| H | 1.000146  | -0.648085 | 0.075465  |

#### C12

|   |           |           |           |
|---|-----------|-----------|-----------|
| C | 0.102742  | -0.018441 | 0.062968  |
| C | 0.355483  | 1.454976  | -0.274152 |
| C | -0.952320 | 1.969211  | -0.912844 |

|   |           |           |           |
|---|-----------|-----------|-----------|
| C | -1.595645 | 0.712528  | -1.547878 |
| C | -0.785378 | -0.511993 | -1.088063 |
| C | -0.039015 | -0.956772 | -2.358342 |
| C | -0.506050 | -2.390424 | -2.616489 |
| C | -1.992622 | -2.347903 | -2.198399 |
| C | -1.904119 | -1.592734 | -0.845232 |
| C | -1.766792 | -2.383185 | 0.451197  |
| C | -2.383066 | -1.445806 | 1.482524  |
| C | -3.076461 | -0.686165 | -0.533402 |
| C | -1.463383 | 0.739388  | -3.068649 |
| C | -1.688615 | 2.537090  | 0.305175  |
| C | -0.535448 | 2.950474  | 1.213975  |
| C | -2.663669 | 3.670581  | 0.033686  |
| C | -2.777589 | -3.680601 | -2.287124 |
| C | -4.151250 | -3.541350 | -1.608539 |
| C | -1.975226 | -4.862667 | -1.720155 |
| C | -3.058793 | -3.981501 | -3.771381 |
| O | -0.612645 | 2.954898  | -1.853740 |
| O | -0.456743 | -2.757111 | 0.764889  |
| O | -2.186926 | -1.457500 | 2.660521  |
| O | -3.214794 | -0.562740 | 0.855071  |
| O | -2.968930 | 0.507622  | -1.173316 |
| O | -0.512214 | -0.142167 | -3.451840 |
| O | -2.077912 | 1.427678  | -3.828480 |
| O | -0.557446 | 3.737233  | 2.111413  |
| O | 0.590150  | 2.255685  | 0.875576  |
| O | -0.223710 | -2.824404 | -3.915535 |
| H | -0.416488 | -0.060511 | 1.027130  |
| H | 1.193997  | 1.595829  | -0.962534 |
| H | 1.046792  | -0.847185 | -2.319014 |
| H | 0.037405  | -3.052587 | -1.930986 |
| H | -2.506265 | -1.656928 | -2.888458 |
| H | -2.425271 | -3.260166 | 0.419763  |
| H | -2.211563 | 1.722741  | 0.825120  |
| H | -3.503474 | 3.315352  | -0.570353 |
| H | -2.163250 | 4.492098  | -0.484610 |
| H | -3.047480 | 4.054472  | 0.980976  |
| H | -4.109179 | -3.419262 | -0.522312 |
| H | -4.749968 | -4.436274 | -1.808032 |
| H | -4.693134 | -2.678454 | -2.012881 |
| H | -1.582387 | -4.692399 | -0.713013 |
| H | -1.120849 | -5.083508 | -2.368981 |
| H | -2.606440 | -5.756980 | -1.688974 |
| H | -3.662382 | -3.185963 | -4.223794 |
| H | -3.623591 | -4.916240 | -3.855539 |
| H | -2.132699 | -4.085772 | -4.338910 |
| H | -0.410737 | -2.864225 | 1.730912  |
| H | -1.406175 | 3.199287  | -2.358762 |
| H | -0.543493 | -2.136462 | -4.522844 |
| H | 1.016203  | -0.605384 | 0.170395  |

#### C14

|   |           |           |           |
|---|-----------|-----------|-----------|
| C | 0.171858  | -0.011648 | -0.015942 |
| C | 0.462545  | 1.467328  | -0.308745 |
| C | -0.818384 | 2.019434  | -0.978761 |
| C | -1.486074 | 0.791219  | -1.640833 |
| C | -0.755836 | -0.467575 | -1.153283 |
| C | -0.016667 | -0.975742 | -2.403400 |
| C | -0.530136 | -2.395230 | -2.627029 |
| C | -2.021133 | -2.300879 | -2.226534 |
| C | -1.929737 | -1.485143 | -0.907868 |
| C | -1.836272 | -2.212429 | 0.426722  |
| C | -2.316695 | -1.148765 | 1.405868  |
| C | -3.105240 | -0.517309 | -0.659299 |
| C | -1.297146 | 0.806527  | -3.160232 |
| C | -1.520993 | 2.603072  | 0.206890  |
| C | -0.527884 | 2.796921  | 1.263429  |
| C | -2.886984 | 3.167047  | 0.278501  |
| C | -2.811061 | -3.637305 | -2.268851 |
| C | -4.208229 | -3.478204 | -1.646108 |
| C | -2.034342 | -4.786068 | -1.605375 |
| C | -3.045745 | -4.022927 | -3.741790 |
| O | -0.453279 | 3.018515  | -1.910133 |
| O | -0.563328 | -2.697708 | 0.739843  |
| O | -2.049550 | -1.105556 | 2.572197  |
| O | -3.088786 | -0.249237 | 0.759813  |
| O | -2.874812 | 0.648949  | -1.371131 |

|   |           |           |           |
|---|-----------|-----------|-----------|
| O | -0.438863 | -0.170510 | -3.522905 |
| O | -1.825445 | 1.548524  | -3.935673 |
| O | -0.654683 | 3.388611  | 2.303296  |
| O | 0.653459  | 2.200905  | 0.892631  |
| O | -0.243958 | -2.875031 | -3.909475 |
| H | -0.312390 | -0.052427 | 0.962744  |
| H | 1.331747  | 1.626909  | -0.952208 |
| H | 1.072098  | -0.908351 | -2.350245 |
| H | -0.016117 | -3.052693 | -1.915409 |
| H | -2.511194 | -1.634413 | -2.958237 |
| H | -2.578888 | -3.020881 | 0.466507  |
| H | -4.101942 | -0.875348 | -0.917714 |
| H | -3.609626 | 2.387770  | 0.549107  |
| H | -3.200152 | 3.578400  | -0.686732 |
| H | -2.920506 | 3.947759  | 1.042538  |
| H | -4.203795 | -3.254097 | -0.575263 |
| H | -4.770888 | -4.408732 | -1.773426 |
| H | -4.770742 | -2.686783 | -2.156043 |
| H | -1.682195 | -4.558248 | -0.594898 |
| H | -1.156769 | -5.046143 | -2.206535 |
| H | -2.669631 | -5.676360 | -1.550379 |
| H | -3.614480 | -3.244828 | -4.264717 |
| H | -3.629112 | -4.948916 | -3.788605 |
| H | -2.103866 | -4.180418 | -4.268410 |
| H | -0.479791 | -2.665364 | 1.709789  |
| H | -1.214600 | 3.210831  | -2.483223 |
| H | -0.531149 | -2.194569 | -4.540893 |
| H | 1.073224  | -0.623316 | 0.054276  |

#### C14Me

|   |           |           |           |
|---|-----------|-----------|-----------|
| C | 0.065152  | -0.045114 | 0.077779  |
| C | 0.332844  | 1.426307  | -0.254750 |
| C | -0.970266 | 1.956746  | -0.880791 |
| C | -1.636701 | 0.718510  | -1.522861 |
| C | -0.843824 | -0.516346 | -1.071685 |
| C | -0.081923 | -0.944693 | -2.339578 |
| C | -0.539071 | -2.374936 | -2.617153 |
| C | -2.032097 | -2.354999 | -2.211569 |
| C | -1.965529 | -1.594590 | -0.859132 |
| C | -1.815452 | -2.383586 | 0.435085  |
| C | -2.335506 | -1.399970 | 1.472860  |
| C | -3.180483 | -0.693328 | -0.549528 |
| C | -1.499216 | 0.756522  | -3.046521 |
| C | -1.696465 | 2.520292  | 0.354901  |
| C | -0.519442 | 2.955406  | 1.225341  |
| C | -2.682350 | 3.597072  | 0.089336  |
| C | -2.768493 | -3.718677 | -2.310212 |
| C | -4.162540 | -3.648565 | -1.664240 |
| C | -1.937360 | -4.866800 | -1.714717 |
| C | -3.006627 | -4.039865 | -3.798053 |
| O | -0.627399 | 2.956785  | -1.799276 |
| O | -0.512736 | -2.811588 | 0.708034  |
| O | -2.045717 | -1.393826 | 2.635160  |
| O | -3.169459 | -0.515836 | 0.886405  |
| O | -3.004192 | 0.528550  | -1.181905 |
| O | -0.537547 | -0.119849 | -3.428811 |
| O | -2.126031 | 1.425918  | -3.809828 |
| O | -0.512460 | 3.779799  | 2.087984  |
| O | 0.584728  | 2.228092  | 0.892813  |
| O | -0.240378 | -2.791073 | -3.918553 |
| H | -0.430645 | -0.084449 | 1.052133  |
| H | 1.168410  | 1.561152  | -0.948229 |
| H | 1.003342  | -0.836791 | -2.281028 |
| H | 0.001534  | -3.040428 | -1.933285 |
| H | -2.551585 | -1.678769 | -2.913262 |
| H | -2.511868 | -3.232890 | 0.441264  |
| H | -4.162862 | -1.077797 | -0.823350 |
| H | -2.181647 | 1.684336  | 0.884805  |
| H | -3.637609 | 3.346431  | -0.354139 |
| H | -2.524136 | 4.584640  | 0.501816  |
| H | -4.153085 | -3.475720 | -0.583729 |
| H | -4.687675 | -4.594846 | -1.829926 |
| H | -4.764367 | -2.858178 | -2.128752 |
| H | -1.578997 | -4.675414 | -0.698839 |
| H | -1.059409 | -5.061731 | -2.339465 |
| H | -2.536590 | -5.783205 | -1.695443 |
| H | -3.617013 | -3.263002 | -4.273536 |

|   |           |           |           |
|---|-----------|-----------|-----------|
| H | -3.548044 | -4.988176 | -3.885400 |
| H | -2.065805 | -4.126970 | -4.342839 |
| H | -0.418098 | -2.825756 | 1.677311  |
| H | -1.443978 | 3.381201  | -2.112878 |
| H | -0.541582 | -2.087986 | -4.518189 |
| H | 0.973774  | -0.643886 | 0.160067  |

### C3OH

|   |           |           |           |
|---|-----------|-----------|-----------|
| C | 0.055232  | -0.029543 | 0.075439  |
| C | 0.365964  | 1.431896  | -0.263304 |
| C | -0.977731 | 1.976955  | -0.909040 |
| C | -1.639128 | 0.724126  | -1.536536 |
| C | -0.843765 | -0.505476 | -1.074231 |
| C | -0.072777 | -0.940916 | -2.333864 |
| C | -0.538021 | -2.369548 | -2.611502 |
| C | -2.031907 | -2.343045 | -2.208338 |
| C | -1.964585 | -1.582198 | -0.856270 |
| C | -1.810485 | -2.369045 | 0.438590  |
| C | -2.329479 | -1.384875 | 1.476867  |
| C | -3.177246 | -0.678532 | -0.543893 |
| C | -1.509202 | 0.737251  | -3.064365 |
| C | -1.671260 | 2.563736  | 0.329310  |
| C | -0.498285 | 2.948389  | 1.222897  |
| C | -2.611933 | 3.727362  | 0.054200  |
| C | -2.772708 | -3.704448 | -2.306175 |
| C | -4.164662 | -3.630547 | -1.656327 |
| C | -1.943865 | -4.855528 | -1.713276 |
| C | -3.014722 | -4.023218 | -3.793831 |
| O | -0.581758 | 2.917525  | -1.798497 |
| O | -0.504591 | -2.790086 | 0.709266  |
| O | -2.036108 | -1.378305 | 2.638343  |
| O | -3.161745 | -0.499043 | 0.891604  |
| O | -2.998982 | 0.542764  | -1.177060 |
| O | -0.510223 | -0.114495 | -3.425542 |
| O | -2.165108 | 1.349718  | -3.845528 |
| O | -0.489378 | 3.726401  | 2.125313  |
| O | 0.618283  | 2.237737  | 0.862647  |
| O | -0.239719 | -2.786325 | -3.912253 |
| H | -0.450488 | -0.041366 | 1.045269  |
| H | 1.201354  | 1.539428  | -0.960660 |
| H | 1.013096  | -0.844131 | -2.263550 |
| H | -0.002283 | -3.038202 | -1.926878 |
| H | -2.548832 | -1.665952 | -2.911116 |
| H | -2.503412 | -3.221052 | 0.446906  |
| H | -4.161168 | -1.060629 | -0.815038 |
| H | -2.213990 | 1.762609  | 0.849158  |
| H | -3.479658 | 3.382987  | -0.513082 |
| H | -2.098476 | 4.504164  | -0.516958 |
| H | -2.946920 | 4.154599  | 1.001635  |
| H | -4.151242 | -3.458815 | -0.575580 |
| H | -4.693090 | -4.575121 | -1.821142 |
| H | -4.765577 | -2.838083 | -2.118368 |
| H | -1.582737 | -4.665816 | -0.697976 |
| H | -1.068102 | -5.053484 | -2.340074 |
| H | -2.546292 | -5.769777 | -1.692733 |
| H | -3.625405 | -3.245081 | -4.266686 |
| H | -3.557098 | -4.970950 | -3.881255 |
| H | -2.075173 | -4.110188 | -4.340894 |
| H | -0.413888 | -2.820263 | 1.678558  |
| H | -0.530007 | -2.077891 | -4.511260 |
| H | 0.958314  | -0.634321 | 0.177499  |

### C7OH

|   |           |           |           |
|---|-----------|-----------|-----------|
| C | 0.091624  | -0.036468 | 0.038729  |
| C | 0.357355  | 1.439331  | -0.282135 |
| C | -0.951697 | 1.979031  | -0.896676 |
| C | -1.615630 | 0.741170  | -1.545584 |
| C | -0.832064 | -0.501088 | -1.099974 |
| C | -0.091386 | -0.938023 | -2.384624 |
| C | -0.512985 | -2.399806 | -2.585955 |
| C | -2.037041 | -2.354734 | -2.205389 |
| C | -1.956210 | -1.569189 | -0.868928 |
| C | -1.815781 | -2.345884 | 0.434110  |
| C | -2.335472 | -1.347435 | 1.457432  |
| C | -3.172110 | -0.660952 | -0.576535 |
| C | -1.472238 | 0.782859  | -3.069070 |
| C | -1.667255 | 2.535876  | 0.338179  |

|   |           |           |           |
|---|-----------|-----------|-----------|
| C | -0.499228 | 2.920366  | 1.240240  |
| C | -2.628940 | 3.687032  | 0.094511  |
| C | -2.772681 | -3.714576 | -2.297486 |
| C | -4.169354 | -3.628884 | -1.656644 |
| C | -1.948816 | -4.860393 | -1.689543 |
| C | -3.006821 | -4.035810 | -3.784553 |
| O | -0.609514 | 2.978631  | -1.822391 |
| O | -0.519771 | -2.783874 | 0.718793  |
| O | -2.046566 | -1.326962 | 2.619408  |
| O | -3.169318 | -0.473100 | 0.857318  |
| O | -2.988198 | 0.551844  | -1.219902 |
| O | -0.575889 | -0.141074 | -3.468030 |
| O | -2.056242 | 1.514364  | -3.813901 |
| O | -0.500438 | 3.691835  | 2.151238  |
| O | 0.615008  | 2.218149  | 0.877472  |
| O | -0.329373 | -2.888295 | -3.835294 |
| H | -0.394199 | -0.081364 | 1.017922  |
| H | 1.189297  | 1.582242  | -0.977983 |
| H | 0.993335  | -0.813482 | -2.338843 |
| H | -0.015426 | -3.019870 | -1.818537 |
| H | -2.513437 | -1.687004 | -2.939424 |
| H | -2.520450 | -3.188376 | 0.445392  |
| H | -4.153905 | -1.045320 | -0.852844 |
| H | -2.194810 | 1.720114  | 0.850726  |
| H | -3.481229 | 3.351473  | -0.503208 |
| H | -2.123212 | 4.506080  | -0.422135 |
| H | -2.994495 | 4.064620  | 1.051581  |
| H | -4.160548 | -3.449534 | -0.577484 |
| H | -4.697622 | -4.573710 | -1.818204 |
| H | -4.765483 | -2.839193 | -2.128845 |
| H | -1.615739 | -4.672267 | -0.664629 |
| H | -1.057082 | -5.043920 | -2.298191 |
| H | -2.543467 | -5.779621 | -1.689204 |
| H | -3.621517 | -3.265025 | -4.262060 |
| H | -3.534449 | -4.991323 | -3.874940 |
| H | -2.066068 | -4.116049 | -4.334835 |
| H | -0.423843 | -2.770574 | 1.688233  |
| H | -1.391126 | 3.199423  | -2.356292 |
| H | 1.000875  | -0.636230 | 0.109047  |

### C10OH

|   |           |           |           |
|---|-----------|-----------|-----------|
| C | 0.067719  | -0.051726 | 0.051631  |
| C | 0.355667  | 1.423969  | -0.255984 |
| C | -0.937044 | 1.979635  | -0.892587 |
| C | -1.608742 | 0.751739  | -1.553653 |
| C | -0.838105 | -0.496552 | -1.109006 |
| C | -0.085381 | -0.940580 | -2.376243 |
| C | -0.543615 | -2.374295 | -2.632202 |
| C | -2.033984 | -2.351271 | -2.219831 |
| C | -1.970646 | -1.559458 | -0.887973 |
| C | -1.783450 | -2.307463 | 0.432783  |
| C | -2.424915 | -1.362320 | 1.477847  |
| C | -3.180077 | -0.651410 | -0.603662 |
| C | -1.456673 | 0.798508  | -3.075872 |
| C | -1.666375 | 2.545437  | 0.329202  |
| C | -0.509562 | 2.914459  | 1.251849  |
| C | -2.608674 | 3.709251  | 0.069867  |
| C | -2.767167 | -3.719432 | -2.287951 |
| C | -4.132961 | -3.656525 | -1.584723 |
| C | -1.911688 | -4.867175 | -1.727578 |
| C | -3.057762 | -4.042266 | -3.765728 |
| O | -0.563850 | 2.971785  | -1.814768 |
| O | -0.531823 | -2.721850 | 0.755316  |
| O | -2.272850 | -1.378009 | 2.657328  |
| O | -3.209916 | -0.471023 | 0.823723  |
| O | -2.982241 | 0.569729  | -1.236826 |
| O | -0.551523 | -0.127140 | -3.469718 |
| O | -2.035998 | 1.521491  | -3.830623 |
| O | -0.515663 | 3.687858  | 2.160640  |
| O | 0.601457  | 2.196092  | 0.908824  |
| O | -0.254922 | -2.814597 | -3.927386 |
| H | -0.438937 | -0.095567 | 1.021936  |
| H | 1.201291  | 1.557464  | -0.937068 |
| H | 1.000409  | -0.830831 | -2.327741 |
| H | 0.003114  | -3.026785 | -1.940987 |
| H | -2.556961 | -1.691148 | -2.933945 |
| H | -2.395679 | -3.227189 | 0.474082  |

|   |           |           |           |
|---|-----------|-----------|-----------|
| H | -4.156938 | -1.028955 | -0.906672 |
| H | -2.214537 | 1.735727  | 0.829848  |
| H | -3.452168 | 3.386697  | -0.547296 |
| H | -2.082645 | 4.526050  | -0.430225 |
| H | -2.990517 | 4.086669  | 1.020551  |
| H | -4.081206 | -3.454134 | -0.509299 |
| H | -4.648839 | -4.614928 | -1.701834 |
| H | -4.768669 | -2.887999 | -2.039866 |
| H | -1.549905 | -4.698330 | -0.708702 |
| H | -1.036428 | -5.035726 | -2.363195 |
| H | -2.497321 | -5.792235 | -1.721428 |
| H | -3.690277 | -3.269510 | -4.217897 |
| H | -3.593803 | -4.994865 | -3.836245 |
| H | -2.135194 | -4.121312 | -4.342768 |
| H | -1.346030 | 3.242043  | -2.324165 |
| H | -0.561117 | -2.124600 | -4.539510 |
| H | 0.972545  | -0.658606 | 0.138064  |

# IM

|   |           |           |           |
|---|-----------|-----------|-----------|
| C | 0.081266  | 0.015474  | 0.034455  |
| C | 0.347519  | 1.486069  | -0.387005 |
| C | -1.010984 | 1.997405  | -0.908765 |
| C | -1.666512 | 0.758725  | -1.532001 |
| C | -0.867680 | -0.477364 | -1.079289 |
| C | -0.105688 | -0.918193 | -2.339605 |
| C | -0.536547 | -2.360136 | -2.585127 |
| C | -2.029002 | -2.349955 | -2.188811 |
| C | -1.987305 | -1.554695 | -0.848327 |
| C | -1.908763 | -2.331889 | 0.458667  |
| C | -2.629383 | -1.434304 | 1.460323  |
| C | -3.241541 | -0.673276 | -0.617417 |
| C | -1.517254 | 0.782694  | -3.059503 |
| C | -1.647472 | 2.561517  | 0.363310  |
| C | -0.426452 | 2.907685  | 1.214389  |
| C | -2.566615 | 3.758097  | 0.165537  |
| C | -2.748798 | -3.724541 | -2.276429 |
| C | -4.152887 | -3.673259 | -1.647745 |
| C | -1.901345 | -4.857323 | -1.672178 |
| C | -2.972437 | -4.065073 | -3.763194 |
| O | -0.603412 | -2.665546 | 0.868841  |
| O | -2.557113 | -1.536248 | 2.650963  |
| O | -3.411989 | -0.555174 | 0.802781  |
| O | -3.030290 | 0.571698  | -1.195850 |
| O | -0.571684 | -0.119572 | -3.439025 |
| O | -2.095452 | 1.481289  | -3.833744 |
| O | -0.380779 | 3.619680  | 2.171228  |
| O | 0.694844  | 2.304700  | 0.706450  |
| O | -0.219610 | -2.802364 | -3.873873 |
| O | -0.534915 | 0.059396  | 1.293881  |
| H | 1.150863  | 1.541947  | -1.127645 |
| H | 0.979678  | -0.797550 | -2.286209 |
| H | 0.010510  | -3.000141 | -1.881610 |
| H | -2.548962 | -1.692348 | -2.907472 |
| H | -2.514911 | -3.240316 | 0.380418  |
| H | -4.173686 | -1.073433 | -1.018434 |
| H | -2.183356 | 1.768689  | 0.897751  |
| H | -3.455908 | 3.458553  | -0.394619 |
| H | -2.058680 | 4.555918  | -0.385437 |
| H | -2.871885 | 4.155141  | 1.136251  |
| H | -4.172261 | -3.452417 | -0.576312 |
| H | -4.644449 | -4.642300 | -1.782009 |
| H | -4.772658 | -2.924129 | -2.154231 |
| H | -1.542208 | -4.653743 | -0.658870 |
| H | -1.021657 | -5.043881 | -2.297033 |
| H | -2.486839 | -5.782189 | -1.643488 |
| H | -3.583643 | -3.297778 | -4.252592 |
| H | -3.508126 | -5.017301 | -3.843322 |
| H | -2.027217 | -4.154118 | -4.299722 |
| H | -0.687337 | -3.122336 | 1.722891  |
| H | -0.533028 | -2.121411 | -4.492631 |
| H | 1.001785  | -0.576906 | 0.067678  |
| H | -0.893362 | 2.796369  | -1.648369 |
| H | -0.291127 | -0.742811 | 1.778289  |

# C1

|   |          |          |           |
|---|----------|----------|-----------|
| C | 0.112159 | 0.088303 | -0.025327 |
| C | 0.351273 | 1.548850 | -0.380332 |

|   |           |           |           |
|---|-----------|-----------|-----------|
| C | -1.016967 | 2.023396  | -0.930192 |
| C | -1.620529 | 0.776958  | -1.588268 |
| C | -0.834445 | -0.461707 | -1.083600 |
| C | -0.069089 | -0.944047 | -2.335114 |
| C | -0.524576 | -2.380924 | -2.559755 |
| C | -2.021222 | -2.334925 | -2.179095 |
| C | -1.973070 | -1.526580 | -0.848240 |
| C | -1.935031 | -2.286167 | 0.469669  |
| C | -2.550718 | -1.303631 | 1.463271  |
| C | -3.200879 | -0.612525 | -0.632492 |
| C | -1.415552 | 0.791365  | -3.107467 |
| C | -1.691083 | 2.499180  | 0.358498  |
| C | -0.503202 | 2.936458  | 1.210436  |
| C | -2.735317 | 3.593332  | 0.205720  |
| C | -2.774071 | -3.692323 | -2.260375 |
| C | -4.189991 | -3.596852 | -1.664578 |
| C | -1.972451 | -4.836437 | -1.618046 |
| C | -2.974413 | -4.049973 | -3.746552 |
| O | -0.657925 | -2.730511 | 0.870872  |
| O | -2.439886 | -1.357575 | 2.652066  |
| O | -3.281513 | -0.389316 | 0.790437  |
| O | -3.000350 | 0.575217  | -1.311399 |
| O | -0.509350 | -0.159204 | -3.455949 |
| O | -1.934020 | 1.517754  | -3.898828 |
| O | -0.506370 | 3.676580  | 2.147064  |
| O | 0.642013  | 2.357565  | 0.741361  |
| O | -0.205540 | -2.851317 | -3.837852 |
| O | -0.025742 | -0.142019 | 1.297634  |
| H | 1.170844  | 1.664649  | -1.098092 |
| H | 1.014693  | -0.836433 | -2.260489 |
| H | 0.003515  | -3.019043 | -1.840506 |
| H | -2.518805 | -1.671758 | -2.907954 |
| H | -2.618939 | -3.139259 | 0.416246  |
| H | -4.160956 | -1.020945 | -0.949952 |
| H | -2.133656 | 1.642637  | 0.883931  |
| H | -3.599777 | 3.213794  | -0.344080 |
| H | -2.323693 | 4.450326  | -0.336243 |
| H | -3.057733 | 3.937129  | 1.191078  |
| H | -4.226854 | -3.387720 | -0.591221 |
| H | -4.711000 | -4.547266 | -1.818904 |
| H | -4.772041 | -2.822231 | -2.177705 |
| H | -1.647486 | -4.631287 | -0.593650 |
| H | -1.074420 | -5.046394 | -2.208234 |
| H | -2.577852 | -5.748739 | -1.603694 |
| H | -3.553316 | -3.273994 | -4.260970 |
| H | -3.534823 | -4.988056 | -3.823371 |
| H | -2.021003 | -4.173331 | -4.260831 |
| H | -0.767174 | -3.178189 | 1.727877  |
| H | -0.488461 | -2.170115 | -4.470852 |
| H | -0.930786 | 2.850408  | -1.642893 |
| H | -0.040953 | -1.109176 | 1.435476  |

# C2

|   |           |           |           |
|---|-----------|-----------|-----------|
| C | 0.079229  | -0.027327 | 0.095421  |
| C | 0.261443  | 1.440939  | -0.245679 |
| C | -0.993626 | 1.983981  | -0.879659 |
| C | -1.678555 | 0.742475  | -1.467867 |
| C | -0.868989 | -0.494441 | -1.034285 |
| C | -0.109822 | -0.905695 | -2.305099 |
| C | -0.533543 | -2.346934 | -2.570465 |
| C | -2.027947 | -2.345301 | -2.175835 |
| C | -1.984449 | -1.577962 | -0.818686 |
| C | -1.897805 | -2.394166 | 0.464258  |
| C | -2.618076 | -1.533503 | 1.497379  |
| C | -3.238762 | -0.704785 | -0.551619 |
| C | -1.572599 | 0.760508  | -2.998014 |
| C | -1.645123 | 2.666229  | 0.336062  |
| C | -0.413854 | 3.069223  | 1.146103  |
| C | -2.572729 | 3.833034  | 0.045313  |
| C | -2.748372 | -3.717416 | -2.293845 |
| C | -4.150639 | -3.680725 | -1.659855 |
| C | -1.899220 | -4.866081 | -1.722840 |
| C | -2.977312 | -4.020337 | -3.788043 |
| O | -0.590452 | -2.742942 | 0.855587  |
| O | -2.545045 | -1.674705 | 2.683810  |
| O | -3.410294 | -0.640435 | 0.869942  |
| O | -3.025640 | 0.567141  | -1.074296 |

|   |           |           |           |
|---|-----------|-----------|-----------|
| O | -0.597788 | -0.100506 | -3.391864 |
| O | -2.200901 | 1.428723  | -3.760469 |
| O | -0.306302 | 3.915409  | 1.975432  |
| O | 0.657307  | 2.267961  | 0.771200  |
| O | -0.215888 | -2.771512 | -3.864801 |
| O | -0.526207 | -0.049146 | 1.368990  |
| H | 0.972835  | -0.766153 | -2.257022 |
| H | 0.013831  | -2.995457 | -1.875022 |
| H | -2.548576 | -1.674920 | -2.881707 |
| H | -2.503500 | -3.299811 | 0.358285  |
| H | -4.170382 | -1.088438 | -0.969922 |
| H | -2.163762 | 1.900797  | 0.930190  |
| H | -3.457540 | 3.481331  | -0.490580 |
| H | -2.069339 | 4.587617  | -0.566781 |
| H | -2.885280 | 4.305450  | 0.979428  |
| H | -4.167563 | -3.484301 | -0.583597 |
| H | -4.642849 | -4.646318 | -1.815064 |
| H | -4.771544 | -2.919978 | -2.147308 |
| H | -1.539277 | -4.692205 | -0.704383 |
| H | -1.019874 | -5.032924 | -2.353708 |
| H | -2.483767 | -5.792010 | -1.720730 |
| H | -3.590576 | -3.241258 | -4.255712 |
| H | -3.512686 | -4.970624 | -3.890337 |
| H | -2.033718 | -4.095293 | -4.329577 |
| H | -0.670119 | -3.234629 | 1.690412  |
| H | -0.526989 | -2.080682 | -4.473756 |
| H | 1.012434  | -0.601468 | 0.097155  |
| H | -0.796735 | 2.738513  | -1.652166 |
| H | -0.270670 | -0.873863 | 1.809484  |

### C3

|   |           |           |           |
|---|-----------|-----------|-----------|
| C | 0.019327  | -0.039505 | 0.117989  |
| C | 0.285877  | 1.438010  | -0.296762 |
| C | -1.086736 | 1.873145  | -0.733922 |
| C | -1.754642 | 0.714835  | -1.400546 |
| C | -0.910990 | -0.522765 | -1.017155 |
| C | -0.156305 | -0.883602 | -2.303490 |
| C | -0.562927 | -2.321327 | -2.612222 |
| C | -2.046017 | -2.369533 | -2.183971 |
| C | -2.003039 | -1.628102 | -0.812204 |
| C | -1.879139 | -2.447229 | 0.466272  |
| C | -2.626972 | -1.617274 | 1.504007  |
| C | -3.282048 | -0.792152 | -0.531502 |
| C | -1.638551 | 0.800138  | -2.934123 |
| C | -1.656139 | 2.722339  | 0.346023  |
| C | -0.428144 | 2.988483  | 1.223658  |
| C | -2.335874 | 4.023207  | -0.088479 |
| C | -2.728194 | -3.760062 | -2.311437 |
| C | -4.119216 | -3.772617 | -1.652637 |
| C | -1.835931 | -4.888919 | -1.766970 |
| C | -2.972775 | -4.051092 | -3.805211 |
| O | -0.558039 | -2.731733 | 0.856783  |
| O | -2.523527 | -1.750045 | 2.690439  |
| O | -3.467041 | -0.764229 | 0.888953  |
| O | -3.101757 | 0.493720  | -1.031241 |
| O | -0.650036 | -0.037664 | -3.355587 |
| O | -2.277478 | 1.478230  | -3.676445 |
| O | -0.349391 | 3.737558  | 2.148875  |
| O | 0.648764  | 2.262194  | 0.786482  |
| O | -0.266293 | -2.691659 | -3.928012 |
| O | -0.670432 | 0.033402  | 1.338980  |
| H | 1.066008  | 1.502621  | -1.065357 |
| H | 0.927236  | -0.746023 | -2.256625 |
| H | 0.015482  | -2.981385 | -1.953780 |
| H | -2.599224 | -1.699192 | -2.865591 |
| H | -2.446062 | -3.378640 | 0.363058  |
| H | -4.200187 | -1.192485 | -0.963417 |
| H | -2.359802 | 2.126620  | 0.948091  |
| H | -3.236176 | 3.798279  | -0.664890 |
| H | -1.664834 | 4.621786  | -0.710028 |
| H | -2.607220 | 4.604729  | 0.795446  |
| H | -4.122082 | -3.583591 | -0.574947 |
| H | -4.583031 | -4.752446 | -1.806030 |
| H | -4.773043 | -3.029171 | -2.123356 |
| H | -1.457907 | -4.710708 | -0.755685 |
| H | -0.966946 | -5.029485 | -2.418295 |
| H | -2.395187 | -5.830259 | -1.757325 |

|   |           |           |           |
|---|-----------|-----------|-----------|
| H | -3.616382 | -3.284718 | -4.252709 |
| H | -3.481836 | -5.015386 | -3.910803 |
| H | -2.036783 | -4.090758 | -4.363439 |
| H | -0.615378 | -3.164671 | 1.725561  |
| H | -0.603470 | -1.985267 | -4.504367 |
| H | 0.929248  | -0.641283 | 0.196548  |
| H | -0.372140 | -0.683664 | 1.915972  |

### C6

|   |           |           |           |
|---|-----------|-----------|-----------|
| C | 0.102485  | 0.019873  | -0.025678 |
| C | 0.344359  | 1.501576  | -0.421040 |
| C | -1.030728 | 2.015384  | -0.896052 |
| C | -1.667120 | 0.794110  | -1.563528 |
| C | -0.883446 | -0.457237 | -1.120852 |
| C | -0.201613 | -0.917552 | -2.384024 |
| C | -0.527993 | -2.366625 | -2.616719 |
| C | -2.032439 | -2.369552 | -2.196598 |
| C | -2.004502 | -1.537774 | -0.873142 |
| C | -1.947010 | -2.287338 | 0.450333  |
| C | -2.648595 | -1.351636 | 1.429712  |
| C | -3.253352 | -0.640926 | -0.671455 |
| C | -1.449394 | 0.868628  | -3.084279 |
| C | -1.648204 | 2.525754  | 0.407164  |
| C | -0.409986 | 2.866483  | 1.237566  |
| C | -2.587990 | 3.714827  | 0.269105  |
| C | -2.742616 | -3.749982 | -2.253531 |
| C | -4.158185 | -3.681843 | -1.651140 |
| C | -1.899925 | -4.858308 | -1.600206 |
| C | -2.942568 | -4.139093 | -3.731801 |
| O | -0.653600 | -2.655836 | 0.868815  |
| O | -2.590195 | -1.426948 | 2.622058  |
| O | -3.409197 | -0.470049 | 0.744865  |
| O | -3.043744 | 0.582483  | -1.297680 |
| O | -0.567812 | -0.121339 | -3.461140 |
| O | -1.911372 | 1.641940  | -3.860774 |
| O | -0.352265 | 3.551808  | 2.213032  |
| O | 0.707564  | 2.299920  | 0.682432  |
| O | -0.236606 | -2.818780 | -3.904827 |
| O | -0.470680 | 0.034071  | 1.254107  |
| H | 1.129028  | 1.576080  | -1.179616 |
| H | 0.036438  | -2.988551 | -1.911777 |
| H | -2.552168 | -1.731165 | -2.933210 |
| H | -2.578551 | -3.179233 | 0.385663  |
| H | -4.190595 | -1.048069 | -1.053893 |
| H | -2.159844 | 1.710494  | 0.931060  |
| H | -3.487660 | 3.420584  | -0.277185 |
| H | -2.104984 | 4.536369  | -0.269268 |
| H | -2.873429 | 4.077436  | 1.259128  |
| H | -4.198412 | -3.437130 | -0.585753 |
| H | -4.649132 | -4.652905 | -1.772784 |
| H | -4.766335 | -2.943141 | -2.186468 |
| H | -1.556248 | -4.620472 | -0.589366 |
| H | -1.010029 | -5.060317 | -2.205596 |
| H | -2.481114 | -5.785055 | -1.551423 |
| H | -3.545202 | -3.388006 | -4.255930 |
| H | -3.478652 | -5.092774 | -3.787869 |
| H | -1.989975 | -4.245511 | -4.251258 |
| H | -0.753465 | -3.115352 | 1.719611  |
| H | -0.525729 | -2.131629 | -4.527661 |
| H | 1.026119  | -0.567087 | -0.044029 |
| H | -0.935919 | 2.844068  | -1.605701 |
| H | -0.243838 | -0.800096 | 1.691023  |

### C7

|   |           |           |           |
|---|-----------|-----------|-----------|
| C | 0.072425  | 0.011464  | -0.016788 |
| C | 0.335568  | 1.485933  | -0.424113 |
| C | -1.031720 | 2.007953  | -0.907383 |
| C | -1.696233 | 0.782308  | -1.549567 |
| C | -0.900253 | -0.466302 | -1.119908 |
| C | -0.152324 | -0.896148 | -2.396573 |
| C | -0.696234 | -2.241696 | -2.701304 |
| C | -2.116230 | -2.324489 | -2.220048 |
| C | -2.021240 | -1.534052 | -0.873744 |
| C | -1.928678 | -2.312857 | 0.431752  |
| C | -2.634690 | -1.412359 | 1.442464  |
| C | -3.267025 | -0.645795 | -0.625927 |
| C | -1.523973 | 0.857715  | -3.073215 |



|   |           |           |           |
|---|-----------|-----------|-----------|
| C | -1.641776 | 2.550521  | 0.386598  |
| C | -0.401536 | 2.881734  | 1.216419  |
| C | -2.561237 | 3.752621  | 0.226774  |
| C | -2.782018 | -3.728433 | -2.275501 |
| C | -4.170632 | -3.715568 | -1.611200 |
| C | -1.866083 | -4.811654 | -1.683708 |
| C | -3.040069 | -4.087341 | -3.752564 |
| O | -0.622628 | -2.654003 | 0.832738  |
| O | -2.553133 | -1.519249 | 2.632100  |
| O | -3.414882 | -0.522498 | 0.796170  |
| O | -3.059572 | 0.594137  | -1.215278 |
| O | -0.512908 | 0.036806  | -3.453581 |
| O | -2.120833 | 1.560391  | -3.831246 |
| O | -0.333892 | 3.577873  | 2.183680  |
| O | 0.708718  | 2.288610  | 0.672962  |
| O | -0.315835 | -2.898443 | -3.823676 |
| O | -0.515746 | 0.045743  | 1.255526  |
| H | 1.121453  | 1.550109  | -1.182802 |
| H | 0.939916  | -0.851312 | -2.316985 |
| H | -2.733894 | -1.685941 | -2.888314 |
| H | -2.538390 | -3.218308 | 0.361038  |
| H | -4.206343 | -1.046498 | -1.011653 |
| H | -2.169060 | 1.751157  | 0.919565  |
| H | -3.461914 | 3.464362  | -0.320977 |
| H | -2.062058 | 4.558268  | -0.320835 |
| H | -2.846575 | 4.134241  | 1.209681  |
| H | -4.174998 | -3.482649 | -0.542725 |
| H | -4.632738 | -4.701671 | -1.723444 |
| H | -4.825907 | -2.992472 | -2.111069 |
| H | -1.514400 | -4.590975 | -0.672528 |
| H | -0.978072 | -4.930182 | -2.312062 |
| H | -2.393464 | -5.771241 | -1.660479 |
| H | -3.687713 | -3.342012 | -4.227835 |
| H | -3.549868 | -5.055457 | -3.805985 |
| H | -2.115251 | -4.154564 | -4.325625 |
| H | -0.707119 | -3.115386 | 1.684263  |
| H | 0.486371  | -2.493205 | -4.187338 |
| H | 0.989209  | -0.587420 | -0.008176 |
| H | -0.926163 | 2.822293  | -1.631917 |
| H | -0.285606 | -0.776890 | 1.712164  |

# C8

|   |           |           |           |
|---|-----------|-----------|-----------|
| C | 0.082934  | 0.044459  | 0.101346  |
| C | 0.330906  | 1.492191  | -0.395861 |
| C | -1.030884 | 1.952329  | -0.958876 |
| C | -1.682347 | 0.664821  | -1.488291 |
| C | -0.832820 | -0.521221 | -0.999654 |
| C | -0.058348 | -0.967764 | -2.251671 |
| C | -0.423907 | -2.438410 | -2.457150 |
| C | -1.855074 | -2.502171 | -1.963552 |
| C | -1.911460 | -1.626089 | -0.731817 |
| C | -1.804308 | -2.373989 | 0.602322  |
| C | -2.592081 | -1.502203 | 1.574178  |
| C | -3.207797 | -0.786044 | -0.524602 |
| C | -1.598681 | 0.590872  | -3.017575 |
| C | -1.679531 | 2.599716  | 0.266987  |
| C | -0.470197 | 3.006040  | 1.106404  |
| C | -2.603790 | 3.774449  | -0.017597 |
| C | -2.752965 | -3.674462 | -2.309591 |
| C | -4.119997 | -3.655962 | -1.604827 |
| C | -2.008142 | -4.978998 | -1.951096 |
| C | -3.045690 | -3.682210 | -3.826139 |
| O | -0.483687 | -2.603721 | 1.028011  |
| O | -2.518305 | -1.564747 | 2.767777  |
| O | -3.418646 | -0.688406 | 0.890724  |
| O | -3.019427 | 0.476284  | -1.072616 |
| O | -0.575034 | -0.233832 | -3.371854 |
| O | -2.271123 | 1.170300  | -3.813419 |
| O | -0.438633 | 3.777576  | 2.016708  |
| O | 0.658263  | 2.374855  | 0.653229  |
| O | -0.154262 | -2.883113 | -3.756624 |
| O | -0.578796 | 0.141156  | 1.336562  |
| H | 1.139615  | 1.519583  | -1.132152 |
| H | 1.019917  | -0.793117 | -2.212898 |
| H | 0.211376  | -3.043854 | -1.788661 |
| H | -2.341039 | -3.328563 | 0.519352  |
| H | -4.115678 | -1.207129 | -0.950521 |

|   |           |           |           |
|---|-----------|-----------|-----------|
| H | -2.214751 | 1.839650  | 0.847322  |
| H | -3.486928 | 3.432563  | -0.563118 |
| H | -2.096190 | 4.536866  | -0.616919 |
| H | -2.919245 | 4.233866  | 0.921852  |
| H | -4.064901 | -3.542735 | -0.517243 |
| H | -4.629287 | -4.604398 | -1.802146 |
| H | -4.760313 | -2.861498 | -2.000749 |
| H | -1.785927 | -5.040671 | -0.879233 |
| H | -1.066063 | -5.047742 | -2.503452 |
| H | -2.623055 | -5.844827 | -2.219596 |
| H | -3.458997 | -2.718370 | -4.143604 |
| H | -3.785783 | -4.458709 | -4.049346 |
| H | -2.145560 | -3.890428 | -4.404683 |
| H | -0.540148 | -3.057156 | 1.885727  |
| H | -0.536215 | -2.224218 | -4.360951 |
| H | 1.012405  | -0.526545 | 0.193046  |
| H | -0.915911 | 2.696396  | -1.754039 |
| H | -0.311275 | -0.611294 | 1.884255  |

# C8tBu

|   |           |           |           |
|---|-----------|-----------|-----------|
| C | 0.089172  | 0.020577  | 0.028849  |
| C | 0.372390  | 1.493311  | -0.374478 |
| C | -0.975602 | 2.023268  | -0.905198 |
| C | -1.634584 | 0.799040  | -1.550956 |
| C | -0.858894 | -0.452036 | -1.094484 |
| C | -0.096425 | -0.900264 | -2.353923 |
| C | -0.537475 | -2.338226 | -2.598488 |
| C | -2.026087 | -2.324133 | -2.196718 |
| C | -1.994647 | -1.511538 | -0.869208 |
| C | -1.972354 | -2.291829 | 0.437899  |
| C | -2.686275 | -1.376104 | 1.424552  |
| C | -3.242222 | -0.613063 | -0.664730 |
| C | -1.464752 | 0.833880  | -3.075998 |
| C | -1.620656 | 2.578004  | 0.366590  |
| C | -0.405325 | 2.906247  | 1.232760  |
| C | -2.529463 | 3.783064  | 0.173105  |
| C | -2.724092 | -3.717020 | -2.225076 |
| C | -4.039303 | -3.680110 | -1.496869 |
| C | -1.811394 | -4.821514 | -1.665911 |
| C | -3.045073 | -4.073510 | -3.697356 |
| O | -0.691364 | -2.671315 | 0.884925  |
| O | -2.635224 | -1.475001 | 2.616655  |
| O | -3.433143 | -0.478936 | 0.750855  |
| O | -3.007800 | 0.625532  | -1.246561 |
| O | -0.550588 | -0.099540 | -3.455830 |
| O | -2.010183 | 1.559632  | -3.848977 |
| O | -0.362916 | 3.609555  | 2.196126  |
| O | 0.715766  | 2.297952  | 0.730536  |
| O | -0.238139 | -2.790007 | -3.888487 |
| O | -0.531147 | 0.055674  | 1.285906  |
| H | 1.184024  | 1.549053  | -1.106133 |
| H | 0.989845  | -0.788434 | -2.295474 |
| H | 0.011050  | -2.978525 | -1.897037 |
| H | -2.555238 | -1.692506 | -2.931028 |
| H | -2.621112 | -3.171583 | 0.328361  |
| H | -4.170907 | -1.009595 | -1.076648 |
| H | -2.167198 | 1.783384  | 0.887454  |
| H | -3.415293 | 3.495790  | -0.398809 |
| H | -2.010648 | 4.583211  | -0.364197 |
| H | -2.841345 | 4.171658  | 1.145135  |
| H | -4.367794 | -4.545361 | -0.930083 |
| H | -4.818680 | -3.011046 | -1.850519 |
| H | -1.403773 | -4.587436 | -0.677137 |
| H | -0.967109 | -4.992345 | -2.341038 |
| H | -2.371177 | -5.759409 | -1.592874 |
| H | -3.720449 | -3.332426 | -4.138488 |
| H | -3.541224 | -5.048311 | -3.739975 |
| H | -2.130656 | -4.117425 | -4.293198 |
| H | -0.816225 | -3.105862 | 1.745946  |
| H | -0.538105 | -2.102426 | -4.506571 |
| H | 1.004486  | -0.580865 | 0.059335  |
| H | -0.842470 | 2.829804  | -1.633905 |
| H | -0.324495 | -0.771610 | 1.745594  |

# C10

|   |          |           |           |
|---|----------|-----------|-----------|
| C | 0.092157 | -0.049062 | 0.007164  |
| C | 0.374160 | 1.440792  | -0.327361 |

|   |           |           |           |
|---|-----------|-----------|-----------|
| C | -0.958894 | 1.993892  | -0.879269 |
| C | -1.651969 | 0.777288  | -1.515365 |
| C | -0.858139 | -0.473874 | -1.119389 |
| C | -0.121655 | -0.889597 | -2.401646 |
| C | -0.538119 | -2.338265 | -2.652370 |
| C | -2.020978 | -2.360320 | -2.230372 |
| C | -1.984230 | -1.554578 | -0.895180 |
| C | -1.897869 | -2.251383 | 0.405373  |
| C | -2.756538 | -1.609455 | 1.376891  |
| C | -3.252071 | -0.683743 | -0.660376 |
| C | -1.549919 | 0.828877  | -3.046861 |
| C | -1.629719 | 2.574152  | 0.365701  |
| C | -0.450769 | 2.854004  | 1.285905  |
| C | -2.497354 | 3.803491  | 0.138878  |
| C | -2.721950 | -3.745922 | -2.273859 |
| C | -4.075267 | -3.702662 | -1.549751 |
| C | -1.849476 | -4.855438 | -1.672429 |
| C | -3.003813 | -4.103229 | -3.743969 |
| O | -0.848636 | -2.968087 | 0.815399  |
| O | -2.788624 | -1.834317 | 2.561620  |
| O | -3.524813 | -0.676364 | 0.738336  |
| O | -3.000134 | 0.610396  | -1.127122 |
| O | -0.633772 | -0.082288 | -3.473635 |
| O | -2.140204 | 1.553049  | -3.787750 |
| O | -0.418872 | 3.534526  | 2.265131  |
| O | 0.665900  | 2.172476  | 0.852393  |
| O | -0.242882 | -2.765553 | -3.950826 |
| O | -0.573768 | -0.118315 | 1.244236  |
| H | 1.217375  | 1.550615  | -1.014895 |
| H | 0.963302  | -0.753821 | -2.377879 |
| H | 0.035798  | -2.975509 | -1.967876 |
| H | -2.566104 | -1.718332 | -2.944762 |
| H | -4.147576 | -1.051027 | -1.163417 |
| H | -2.220614 | 1.792212  | 0.858852  |
| H | -3.363894 | 3.537513  | -0.471233 |
| H | -1.936009 | 4.590371  | -0.374382 |
| H | -2.842871 | 4.198137  | 1.096943  |
| H | -3.978033 | -3.464987 | -0.484967 |
| H | -4.558648 | -4.682399 | -1.622769 |
| H | -4.751413 | -2.973866 | -2.011991 |
| H | -1.572096 | -4.658493 | -0.633902 |
| H | -0.933457 | -4.992769 | -2.256849 |
| H | -2.399409 | -5.802115 | -1.700397 |
| H | -3.638614 | -3.345379 | -4.218450 |
| H | -3.535261 | -5.059722 | -3.793609 |
| H | -2.078973 | -4.192850 | -3.616824 |
| H | -0.923204 | -3.022909 | 1.789991  |
| H | -0.617620 | -2.107219 | -4.559489 |
| H | 1.005049  | -0.660027 | 0.020611  |
| H | -0.797904 | 2.787021  | -1.616645 |
| H | -0.013444 | 0.312408  | 1.910233  |

# C12

|   |           |           |           |
|---|-----------|-----------|-----------|
| C | 0.088215  | 0.029185  | 0.058596  |
| C | 0.342542  | 1.496419  | -0.369504 |
| C | -1.012768 | 1.983364  | -0.925394 |
| C | -1.648949 | 0.723215  | -1.530074 |
| C | -0.816201 | -0.492469 | -1.071082 |
| C | -0.059675 | -0.931809 | -2.333271 |
| C | -0.497433 | -2.376294 | -2.578556 |
| C | -1.983833 | -2.352980 | -2.167941 |
| C | -1.920625 | -1.582113 | -0.814169 |
| C | -1.838657 | -2.380437 | 0.484283  |
| C | -2.660471 | -1.554880 | 1.475197  |
| C | -3.135397 | -0.710477 | -0.559200 |
| C | -1.525458 | 0.727418  | -3.056334 |
| C | -1.675531 | 2.575526  | 0.321311  |
| C | -0.474306 | 2.940781  | 1.191824  |
| C | -2.592603 | 3.765317  | 0.078309  |
| C | -2.753285 | -3.694932 | -2.270703 |
| C | -4.129814 | -3.588856 | -1.590457 |
| C | -1.932492 | -4.878533 | -1.732822 |
| C | -3.035091 | -3.976154 | -3.759501 |
| O | -0.530667 | -2.637426 | 0.940308  |
| O | -2.656714 | -1.679110 | 2.662794  |
| O | -3.454281 | -0.681126 | 0.793900  |
| O | -3.009477 | 0.514847  | -1.132795 |

|   |           |           |           |
|---|-----------|-----------|-----------|
| O | -0.538396 | -0.132576 | -3.429723 |
| O | -2.141502 | 1.388654  | -3.833960 |
| O | -0.453018 | 3.668243  | 2.137682  |
| O | 0.658903  | 2.330980  | 0.721390  |
| O | -0.199070 | -2.816914 | -3.872014 |
| O | -0.594370 | 0.070234  | 1.288299  |
| H | 1.158532  | 1.554420  | -1.096032 |
| H | 1.025655  | -0.809022 | -2.290303 |
| H | 0.055303  | -3.022163 | -1.884364 |
| H | -2.500806 | -1.670157 | -2.863104 |
| H | -2.379457 | -3.322922 | 0.363516  |
| H | -2.219875 | 1.794407  | 0.863583  |
| H | -3.471175 | 3.451749  | -0.491028 |
| H | -2.075447 | 4.551074  | -0.481287 |
| H | -2.916497 | 4.184017  | 1.033736  |
| H | -4.096112 | -3.475776 | -0.502919 |
| H | -4.710233 | -4.493470 | -1.800229 |
| H | -4.686861 | -2.732702 | -1.987430 |
| H | -1.543923 | -4.730083 | -0.720366 |
| H | -1.073433 | -5.067883 | -2.385379 |
| H | -2.548870 | -5.783585 | -1.724831 |
| H | -3.651200 | -3.181900 | -4.196533 |
| H | -3.587122 | -4.917199 | -3.857245 |
| H | -2.109508 | -4.058872 | -4.331388 |
| H | -0.610022 | -3.165476 | 1.751793  |
| H | -0.523342 | -2.136415 | -4.485672 |
| H | 1.015981  | -0.546176 | 0.140485  |
| H | -0.889863 | 2.764309  | -1.683076 |
| H | -0.334359 | -0.712814 | 1.796324  |

# C14

|   |           |           |           |
|---|-----------|-----------|-----------|
| C | 0.124015  | 0.056157  | -0.011133 |
| C | 0.479171  | 1.499579  | -0.470916 |
| C | -0.855654 | 2.048374  | -1.034301 |
| C | -1.555058 | 0.813882  | -1.631080 |
| C | -0.811825 | -0.436082 | -1.131596 |
| C | -0.043543 | -0.941161 | -2.362126 |
| C | -0.518364 | -2.374950 | -2.570636 |
| C | -2.016561 | -2.303188 | -2.203379 |
| C | -1.974131 | -1.463962 | -0.889371 |
| C | -1.952006 | -2.196857 | 0.445505  |
| C | -2.667180 | -1.243160 | 1.397698  |
| C | -3.202704 | -0.533591 | -0.717797 |
| C | -1.371501 | 0.793396  | -3.156157 |
| C | -1.413509 | 2.686457  | 0.193222  |
| C | -0.309513 | 2.911542  | 1.122361  |
| C | -2.793223 | 3.150842  | 0.452210  |
| C | -2.779706 | -3.655823 | -2.258227 |
| C | -4.194013 | -3.535555 | -1.662650 |
| C | -1.982385 | -4.792782 | -1.596132 |
| C | -2.984327 | -4.042588 | -3.736390 |
| O | -0.670452 | -2.561767 | 0.898982  |
| O | -2.627961 | -1.306297 | 2.592418  |
| O | -3.413511 | -0.370356 | 0.690273  |
| O | -2.930307 | 0.687672  | -1.323154 |
| O | -0.463679 | -0.161393 | -3.493737 |
| O | -1.899407 | 1.500937  | -3.957921 |
| O | -0.302900 | 3.536566  | 2.149124  |
| O | 0.835038  | 2.320290  | 0.615482  |
| O | -0.193001 | -2.868661 | -3.838524 |
| O | -0.549527 | 0.177241  | 1.213423  |
| H | 1.298696  | 1.499383  | -1.194829 |
| H | 1.044204  | -0.854749 | -2.292632 |
| H | -0.005488 | -3.009600 | -1.837219 |
| H | -2.500822 | -1.654115 | -2.954114 |
| H | -2.588184 | -3.085921 | 0.382369  |
| H | -4.135228 | -0.911918 | -1.138864 |
| H | -3.426494 | 2.308041  | 0.756812  |
| H | -3.244758 | 3.583334  | -0.446660 |
| H | -2.783981 | 3.887165  | 1.259716  |
| H | -4.228526 | -3.272744 | -0.601214 |
| H | -4.714221 | -4.492850 | -1.770855 |
| H | -4.778274 | -2.787151 | -2.210783 |
| H | -1.635309 | -4.563840 | -0.584066 |
| H | -1.098062 | -5.030917 | -2.196469 |
| H | -2.598963 | -5.696265 | -1.545741 |
| H | -3.559169 | -3.273858 | -4.266020 |

|   |           |           |           |
|---|-----------|-----------|-----------|
| H | -3.550233 | -4.978822 | -3.793939 |
| H | -2.031993 | -4.182282 | -4.248925 |
| H | -0.790721 | -2.960936 | 1.777344  |
| H | -0.475541 | -2.200260 | -4.485135 |
| H | 1.013011  | -0.575368 | 0.083833  |
| H | -0.708968 | 2.809771  | -1.814947 |
| H | -0.306640 | -0.572522 | 1.775327  |

#### C14Me

|   |           |           |           |
|---|-----------|-----------|-----------|
| C | 0.067274  | 0.011394  | 0.043858  |
| C | 0.322353  | 1.485864  | -0.370227 |
| C | -1.038744 | 1.991107  | -0.890853 |
| C | -1.689069 | 0.749832  | -1.514500 |
| C | -0.879888 | -0.482561 | -1.070720 |
| C | -0.118036 | -0.910716 | -2.335457 |
| C | -0.539717 | -2.354311 | -2.588042 |
| C | -2.031213 | -2.356360 | -2.188034 |
| C | -1.991400 | -1.568958 | -0.842888 |
| C | -1.903114 | -2.353756 | 0.458883  |
| C | -2.628282 | -1.468468 | 1.468183  |
| C | -3.251252 | -0.697715 | -0.602685 |
| C | -1.546877 | 0.781141  | -3.042578 |
| C | -1.676535 | 2.551695  | 0.387746  |
| C | -0.452695 | 2.897898  | 1.241066  |
| C | -2.577926 | 3.719081  | 0.201187  |
| C | -2.741987 | -3.735220 | -2.282113 |
| C | -4.144246 | -3.697580 | -1.648435 |
| C | -1.884758 | -4.866043 | -1.688093 |
| C | -2.968151 | -4.067550 | -3.770345 |
| O | -0.593645 | -2.678235 | 0.863744  |
| O | -2.551015 | -1.576926 | 2.657925  |
| O | -3.419396 | -0.591196 | 0.818539  |
| O | -3.049457 | 0.553362  | -1.171892 |
| O | -0.592896 | -0.109273 | -3.429092 |
| O | -2.136866 | 1.475501  | -3.811550 |
| O | -0.410264 | 3.604429  | 2.201227  |
| O | 0.666177  | 2.299797  | 0.728325  |
| O | -0.223115 | -2.787085 | -3.879981 |
| O | -0.547900 | 0.045611  | 1.304188  |
| H | 1.124544  | 1.552221  | -1.111083 |
| H | 0.966606  | -0.782831 | -2.284489 |
| H | 0.013461  | -2.994491 | -1.889509 |
| H | -2.557381 | -1.698095 | -2.901566 |
| H | -2.501310 | -3.266974 | 0.376424  |
| H | -4.181428 | -1.101230 | -1.004808 |
| H | -2.196577 | 1.738998  | 0.921295  |
| H | -3.370164 | 3.661040  | -0.534552 |
| H | -2.619651 | 4.478013  | 0.971928  |
| H | -4.161596 | -3.483242 | -0.575630 |
| H | -4.629409 | -4.669249 | -1.786832 |
| H | -4.771049 | -2.949902 | -2.148364 |
| H | -1.523794 | -4.666789 | -0.674556 |
| H | -1.005810 | -5.042377 | -2.316946 |
| H | -2.463754 | -5.795095 | -1.663666 |
| H | -3.586188 | -3.301297 | -4.252725 |
| H | -3.497551 | -5.022889 | -3.854947 |
| H | -2.024069 | -4.146673 | -4.310447 |
| H | -0.671343 | -3.141600 | 1.714840  |
| H | -0.542830 | -2.104940 | -4.494200 |
| H | 0.991972  | -0.574499 | 0.073436  |
| H | -0.929240 | 2.795450  | -1.624425 |
| H | -0.298862 | -0.757195 | 1.785085  |

#### C10H

|   |           |           |           |
|---|-----------|-----------|-----------|
| C | 0.058928  | 0.010081  | 0.038734  |
| C | 0.365424  | 1.494161  | -0.394169 |
| C | -0.995091 | 1.990645  | -0.914856 |
| C | -1.641464 | 0.756296  | -1.558921 |
| C | -0.864495 | -0.487341 | -1.091553 |
| C | -0.088747 | -0.943072 | -2.337195 |
| C | -0.540048 | -2.378846 | -2.585270 |
| C | -2.035959 | -2.347316 | -2.202928 |
| C | -1.994493 | -1.551426 | -0.864432 |
| C | -1.905977 | -2.322954 | 0.447705  |
| C | -2.607455 | -1.410928 | 1.447550  |
| C | -3.230781 | -0.651623 | -0.632889 |
| C | -1.456556 | 0.784500  | -3.082246 |

|   |           |           |           |
|---|-----------|-----------|-----------|
| C | -1.630574 | 2.507904  | 0.376567  |
| C | -0.408378 | 2.919861  | 1.196249  |
| C | -2.636927 | 3.638726  | 0.223380  |
| C | -2.768553 | -3.715118 | -2.286971 |
| C | -4.172652 | -3.644161 | -1.661337 |
| C | -1.934868 | -4.852354 | -1.671826 |
| C | -2.990261 | -4.059488 | -3.772836 |
| O | -0.603851 | -2.663105 | 0.837707  |
| O | -2.555280 | -1.514943 | 2.636557  |
| O | -3.359602 | -0.496935 | 0.786404  |
| O | -3.012015 | 0.578767  | -1.247351 |
| O | -0.524760 | -0.137026 | -3.444399 |
| O | -2.000098 | 1.503440  | -3.862923 |
| O | -0.361234 | 3.659778  | 2.129216  |
| O | 0.718286  | 2.318037  | 0.686830  |
| O | -0.215423 | -2.827142 | -3.869706 |
| O | -0.493182 | 0.013988  | 1.281924  |
| H | 1.171981  | 1.516060  | -1.131633 |
| H | 0.997941  | -0.840302 | -2.268584 |
| H | -0.009348 | -3.025198 | -1.875338 |
| H | -2.542855 | -1.686960 | -2.928821 |
| H | -2.525751 | -3.225189 | 0.387486  |
| H | -4.177992 | -1.042224 | -1.006607 |
| H | -2.106000 | 1.675876  | 0.917811  |
| H | -3.518290 | 3.282558  | -0.314659 |
| H | -2.199691 | 4.474948  | -0.330577 |
| H | -2.938482 | 4.001524  | 1.208315  |
| H | -4.186588 | -3.426569 | -0.589326 |
| H | -4.678194 | -4.605634 | -1.797856 |
| H | -4.780944 | -2.884822 | -2.166981 |
| H | -1.575026 | -4.645532 | -0.659493 |
| H | -1.057526 | -5.055403 | -2.295015 |
| H | -2.532067 | -5.769524 | -1.637144 |
| H | -3.594625 | -3.289988 | -4.267531 |
| H | -3.532176 | -5.008302 | -3.850847 |
| H | -2.044001 | -4.158308 | -4.306100 |
| H | -0.598100 | -2.659571 | 1.812023  |
| H | -0.528082 | -2.152281 | -4.495225 |
| H | 0.994640  | -0.567151 | 0.121163  |
| H | -0.888354 | 2.809422  | -1.634152 |

#### C7OH

|   |           |           |           |
|---|-----------|-----------|-----------|
| C | 0.087965  | 0.016818  | 0.015334  |
| C | 0.346898  | 1.490606  | -0.400835 |
| C | -1.016853 | 1.999778  | -0.911188 |
| C | -1.668302 | 0.762886  | -1.539461 |
| C | -0.868344 | -0.474358 | -1.092595 |
| C | -0.119852 | -0.911653 | -2.369995 |
| C | -0.508902 | -2.385195 | -2.548342 |
| C | -2.032921 | -2.357290 | -2.180333 |
| C | -1.981738 | -1.549745 | -0.848250 |
| C | -1.907039 | -2.326001 | 0.459523  |
| C | -2.624939 | -1.423817 | 1.458327  |
| C | -3.240762 | -0.670788 | -0.623125 |
| C | -1.518729 | 0.793190  | -3.067582 |
| C | -1.647245 | 2.556550  | 0.367066  |
| C | -0.422364 | 2.899562  | 1.214030  |
| C | -2.567500 | 3.754068  | 0.179390  |
| C | -2.746624 | -3.729742 | -2.276705 |
| C | -4.155463 | -3.674865 | -1.656995 |
| C | -1.905692 | -4.864307 | -1.668586 |
| C | -2.958061 | -4.055242 | -3.766918 |
| O | -0.605963 | -2.669445 | 0.872893  |
| O | -2.551049 | -1.521958 | 2.648843  |
| O | -3.408600 | -0.548328 | 0.797359  |
| O | -3.033872 | 0.569735  | -1.207099 |
| O | -0.609152 | -0.134833 | -3.458393 |
| O | -2.077981 | 1.522227  | -3.828036 |
| O | -0.372947 | 3.604361  | 2.175875  |
| O | 0.698114  | 2.303266  | 0.695426  |
| O | -0.303027 | -2.886774 | -3.788653 |
| O | -0.523118 | 0.053780  | 1.277883  |
| H | 1.145426  | 1.553320  | -1.146165 |
| H | 0.964515  | -0.774699 | -2.321323 |
| H | -0.003705 | -2.979190 | -1.764497 |
| H | -2.509991 | -1.702888 | -2.925680 |
| H | -2.520321 | -3.229769 | 0.379772  |

|   |           |           |           |
|---|-----------|-----------|-----------|
| H | -4.172373 | -1.076614 | -1.020099 |
| H | -2.180718 | 1.761681  | 0.900873  |
| H | -3.458799 | 3.457442  | -0.379114 |
| H | -2.061885 | 4.554745  | -0.369465 |
| H | -2.869123 | 4.145881  | 1.153361  |
| H | -4.177476 | -3.463318 | -0.583930 |
| H | -4.648033 | -4.641462 | -1.801886 |
| H | -4.769752 | -2.920288 | -2.161367 |
| H | -1.580383 | -4.676833 | -0.641128 |
| H | -1.007067 | -5.027612 | -2.272840 |
| H | -2.483040 | -5.794376 | -1.675528 |
| H | -3.576498 | -3.292898 | -4.252608 |
| H | -3.471915 | -5.017714 | -3.862949 |
| H | -2.009938 | -4.123864 | -4.306297 |
| H | -0.694923 | -3.109734 | 1.735361  |
| H | 1.010378  | -0.573197 | 0.041643  |
| H | -0.906864 | 2.801806  | -1.648454 |
| H | -0.267168 | -0.744472 | 1.762303  |

# C10OH

|   |           |           |           |
|---|-----------|-----------|-----------|
| C | 0.077761  | -0.032544 | 0.024806  |
| C | 0.353947  | 1.450793  | -0.336021 |
| C | -0.983638 | 1.983487  | -0.895459 |
| C | -1.653554 | 0.753821  | -1.529827 |
| C | -0.866892 | -0.492061 | -1.093460 |
| C | -0.109544 | -0.929286 | -2.358293 |
| C | -0.544577 | -2.371068 | -2.601985 |
| C | -2.034929 | -2.359532 | -2.200939 |
| C | -1.991001 | -1.564020 | -0.863604 |
| C | -1.858539 | -2.338845 | 0.452882  |
| C | -2.683277 | -1.507943 | 1.470173  |
| C | -3.234269 | -0.683499 | -0.625263 |
| C | -1.512497 | 0.788376  | -3.057854 |
| C | -1.662815 | 2.563823  | 0.345700  |
| C | -0.487882 | 2.851188  | 1.271577  |
| C | -2.528796 | 3.793195  | 0.110379  |
| C | -2.755995 | -3.734769 | -2.286110 |
| C | -4.129305 | -3.698528 | -1.593542 |
| C | -1.889052 | -4.883552 | -1.743705 |
| C | -3.036923 | -4.041955 | -3.769936 |
| O | -0.610964 | -2.650759 | 0.887681  |
| O | -2.734183 | -1.659550 | 2.647474  |
| O | -3.411264 | -0.587345 | 0.787685  |
| O | -3.014375 | 0.575788  | -1.184155 |
| O | -0.584753 | -0.126625 | -3.450287 |
| O | -2.083326 | 1.503739  | -3.822034 |
| O | -0.472009 | 3.524938  | 2.256272  |
| O | 0.641885  | 2.203057  | 0.828934  |
| O | -0.235286 | -2.818245 | -3.890518 |
| O | -0.613182 | -0.079067 | 1.249061  |
| H | 1.195306  | 1.552945  | -1.027434 |
| H | 0.976164  | -0.809334 | -2.312107 |
| H | 0.005883  | -3.008818 | -1.899214 |
| H | -2.556644 | -1.703576 | -2.919926 |
| H | -2.386378 | -3.306083 | 0.404359  |
| H | -4.165799 | -1.068218 | -1.043368 |
| H | -2.255808 | 1.785322  | 0.840450  |
| H | -3.393307 | 3.526768  | -0.502597 |
| H | -1.964966 | 4.578301  | -0.402990 |
| H | -2.877648 | 4.191083  | 1.065920  |
| H | -4.097453 | -3.478465 | -0.521389 |
| H | -4.617787 | -4.672040 | -1.704070 |
| H | -4.780763 | -2.954693 | -2.066569 |
| H | -1.532787 | -4.733451 | -0.720203 |
| H | -1.010270 | -5.028906 | -2.380385 |
| H | -2.464317 | -5.815019 | -1.759095 |
| H | -3.668070 | -3.265553 | -4.217666 |
| H | -3.571423 | -4.994429 | -3.853527 |
| H | -2.111157 | -4.115142 | -4.342648 |
| H | -0.561295 | -2.145111 | -4.511231 |
| H | 0.990101  | -0.639569 | 0.066027  |
| H | -0.831299 | 2.774333  | -1.637117 |
| H | -0.010458 | 0.166002  | 1.968463  |

# 1B

|   |           |           |           |
|---|-----------|-----------|-----------|
| C | -0.022536 | -0.200355 | -1.723361 |
| C | -1.340529 | 0.482136  | -1.351667 |

|   |           |           |           |
|---|-----------|-----------|-----------|
| C | -1.925107 | -0.440275 | -0.243163 |
| C | -0.664585 | -0.991746 | 0.487164  |
| C | 0.572559  | -0.609650 | -0.350939 |
| C | 1.358450  | -1.939134 | -0.377041 |
| C | 2.423750  | -1.797574 | 0.710952  |
| C | 2.817785  | -0.310140 | 0.713394  |
| C | 1.416423  | 0.374759  | 0.528066  |
| C | 1.488174  | 1.892710  | 0.243662  |
| C | 0.418467  | 2.540693  | 1.111109  |
| C | 0.611277  | 0.372708  | 1.878115  |
| C | -0.645391 | -2.525233 | 0.585014  |
| C | -2.931464 | 0.285501  | 0.654820  |
| C | -3.906413 | 0.915161  | -0.377382 |
| C | -3.607489 | -0.667589 | 1.634273  |
| C | 3.989747  | 0.024984  | -0.275102 |
| C | 4.466256  | 1.488461  | -0.175443 |
| C | 3.649947  | -0.243660 | -1.745590 |
| C | 5.200869  | -0.841794 | 0.120159  |
| O | -0.263925 | -1.350707 | -2.508609 |
| O | -2.539446 | -1.538548 | -0.912912 |
| O | 1.502543  | 2.344843  | -1.070694 |
| O | 0.019075  | 3.665430  | 1.058995  |
| O | 0.078431  | 1.675055  | 2.094909  |
| O | -0.430902 | -0.539627 | 1.815711  |
| O | 0.452059  | -2.997588 | -0.057383 |
| O | -1.401162 | -3.233079 | 1.180216  |
| O | -3.678450 | 2.109819  | -0.706377 |
| O | -1.084294 | 1.782399  | -0.877266 |
| H | 0.638091  | 0.452045  | -2.295851 |
| H | -2.028049 | 0.505819  | -2.206500 |
| H | 1.747867  | -2.166663 | -1.367230 |
| H | 1.940517  | -2.042342 | 1.666096  |
| H | 3.251145  | -2.497398 | 0.587476  |
| H | 3.201435  | -0.029230 | 1.705968  |
| H | 2.411406  | 2.241883  | 0.720620  |
| H | 1.214045  | 0.132067  | 2.760394  |
| H | -2.401338 | 1.076917  | 1.190984  |
| H | -4.282350 | -0.107778 | 2.289349  |
| H | -2.872052 | -1.193222 | 2.250096  |
| H | -4.199040 | -1.407056 | 1.091479  |
| H | 3.798619  | 2.179875  | -0.693845 |
| H | 5.448259  | 1.573134  | -0.654852 |
| H | 4.584087  | 1.808239  | 0.867476  |
| H | 3.485488  | -1.306159 | -1.945649 |
| H | 4.487360  | 0.077689  | -2.376420 |
| H | 2.767682  | 0.325387  | -2.052956 |
| H | 5.457533  | -0.704704 | 1.177896  |
| H | 6.071917  | -0.549328 | -0.476038 |
| H | 5.034935  | -1.907599 | -0.054566 |
| H | 0.554355  | 2.425976  | -1.315781 |
| H | -1.118971 | -1.723774 | -2.215716 |
| H | -3.466803 | -1.228515 | -1.085895 |
| H | -2.000872 | 2.182234  | -0.723305 |
| O | -4.728243 | 0.118473  | -0.889408 |

# C1

|   |           |           |           |
|---|-----------|-----------|-----------|
| C | -0.014173 | -0.198299 | -1.624798 |
| C | -1.311041 | 0.504165  | -1.319174 |
| C | -1.908769 | -0.438582 | -0.226886 |
| C | -0.658547 | -0.967912 | 0.542264  |
| C | 0.594089  | -0.605160 | -0.294792 |
| C | 1.366238  | -1.941195 | -0.303689 |
| C | 2.425996  | -1.784845 | 0.787192  |
| C | 2.829553  | -0.300804 | 0.747985  |
| C | 1.431515  | 0.386924  | 0.574409  |
| C | 1.507457  | 1.898346  | 0.255234  |
| C | 0.451310  | 2.570844  | 1.121595  |
| C | 0.620490  | 0.410280  | 1.919645  |
| C | -0.645165 | -2.499682 | 0.658392  |
| C | -2.962394 | 0.254625  | 0.640235  |
| C | -3.915787 | 0.863096  | -0.422594 |
| C | -3.642471 | -0.718096 | 1.597137  |
| C | 3.962019  | 0.012943  | -0.294132 |
| C | 4.478219  | 1.463865  | -0.192884 |
| C | 3.547151  | -0.221800 | -1.754170 |
| C | 5.167711  | -0.889899 | 0.029264  |
| O | -0.109254 | -1.223011 | -2.530286 |

|   |           |           |           |
|---|-----------|-----------|-----------|
| O | -2.456170 | -1.538861 | -0.946573 |
| O | 1.521609  | 2.317825  | -1.066877 |
| O | 0.066193  | 3.699932  | 1.063714  |
| O | 0.110704  | 1.722122  | 2.122729  |
| O | -0.443457 | -0.482725 | 1.859160  |
| O | 0.448552  | -2.987346 | 0.021493  |
| O | -1.406450 | -3.195851 | 1.260546  |
| O | -3.708178 | 2.063739  | -0.738708 |
| O | -1.081014 | 1.802771  | -0.832045 |
| H | -1.984392 | 0.522783  | -2.185262 |
| H | 1.763116  | -2.183653 | -1.286590 |
| H | 1.933802  | -1.997475 | 1.745837  |
| H | 3.247918  | -2.494837 | 0.689976  |
| H | 3.244804  | -0.001387 | 1.722369  |
| H | 2.436702  | 2.251658  | 0.717823  |
| H | 1.213489  | 0.164316  | 2.807193  |
| H | -2.466144 | 1.056274  | 1.194102  |
| H | -4.372356 | -0.182698 | 2.212455  |
| H | -2.914518 | -1.204307 | 2.52964   |
| H | -4.173595 | -1.489569 | 1.036254  |
| H | 3.815539  | 2.174901  | -0.690263 |
| H | 5.449690  | 1.529222  | -0.696099 |
| H | 4.629006  | 1.771951  | 0.849399  |
| H | 3.407746  | -1.283203 | -1.978018 |
| H | 4.343423  | 0.141092  | -2.415261 |
| H | 2.632154  | 0.325598  | -2.003730 |
| H | 5.476026  | -0.782149 | 1.076814  |
| H | 6.017617  | -0.606725 | -0.600897 |
| H | 4.966289  | -1.947209 | -1.160236 |
| H | 0.578419  | 2.346179  | -1.337589 |
| H | -1.035024 | -1.543001 | -2.506852 |
| H | -3.395589 | -1.264627 | -1.118707 |
| H | -2.002877 | 2.187697  | -0.697634 |
| O | -4.694128 | 0.043646  | -0.968129 |

## C2

|   |           |           |           |
|---|-----------|-----------|-----------|
| C | 0.036795  | -0.199670 | -1.744266 |
| C | -1.213762 | 0.543161  | -1.310033 |
| C | -1.883422 | -0.369913 | -0.279565 |
| C | -0.658020 | -1.039842 | 0.434112  |
| C | 0.600180  | -0.663402 | -0.373745 |
| C | 1.387162  | -1.987274 | -0.377780 |
| C | 2.454543  | -1.829189 | 0.707970  |
| C | 2.821922  | -0.330884 | 0.717779  |
| C | 1.411742  | 0.331536  | 0.520451  |
| C | 1.435854  | 1.857056  | 0.234663  |
| C | 0.348183  | 2.468944  | 1.110484  |
| C | 0.601324  | 0.298310  | 1.862861  |
| C | -0.669596 | -2.573512 | 0.490431  |
| C | -2.859053 | 0.337214  | 0.671809  |
| C | -3.947470 | 1.009440  | -0.182147 |
| C | -3.492545 | -0.635298 | 1.662633  |
| C | 4.002649  | 0.014697  | -0.254072 |
| C | 4.396994  | 1.503814  | -0.237541 |
| C | 3.720449  | -0.368064 | -1.710988 |
| C | 5.245821  | -0.756341 | 0.229679  |
| O | -0.226048 | -1.345559 | -2.543491 |
| O | -2.548223 | -1.451252 | -0.965990 |
| O | 1.423505  | 2.313125  | -1.072173 |
| O | -0.076843 | 3.584751  | 1.090865  |
| O | 0.024103  | 1.578669  | 2.084881  |
| O | -0.413614 | -0.644775 | 1.781407  |
| O | 0.478987  | -3.045534 | -0.051621 |
| O | -1.486747 | -3.287392 | 0.993456  |
| O | -3.625746 | 2.151939  | -0.764725 |
| O | -1.124740 | 1.838648  | -1.075909 |
| H | 0.728369  | 0.435215  | -2.296058 |
| H | 1.778020  | -2.223521 | -1.366158 |
| H | 1.981655  | -2.092737 | 1.662741  |
| H | 3.299059  | -2.507369 | 0.572881  |
| H | 3.189453  | -0.044248 | 1.714925  |
| H | 2.347715  | 2.233200  | 0.715774  |
| H | 1.199910  | 0.064399  | 2.749625  |
| H | -2.298724 | 1.120269  | 1.193901  |
| H | -4.204681 | -0.107828 | 2.303482  |
| H | -2.726507 | -1.103544 | 2.283260  |
| H | -4.031066 | -1.417142 | 1.125356  |

|   |           |           |           |
|---|-----------|-----------|-----------|
| H | 3.687712  | 2.127046  | -0.786297 |
| H | 5.372221  | 1.613589  | -0.726400 |
| H | 4.502209  | 1.884099  | 0.786256  |
| H | 3.625488  | -1.450215 | -1.841542 |
| H | 4.552410  | -0.036544 | -2.343527 |
| H | 2.811641  | 0.119766  | -2.075696 |
| H | 5.487230  | -0.500867 | 1.268781  |
| H | 6.108738  | -0.487352 | -0.389466 |
| H | 5.127201  | -1.840866 | 0.165512  |
| H | 0.450097  | 2.326045  | -1.312293 |
| H | -1.125322 | -1.637736 | -2.309359 |
| H | -3.325914 | -1.056832 | -1.397490 |
| H | -2.609485 | 2.236099  | -0.798364 |
| O | -5.042622 | 0.501784  | -0.325326 |

## C3

|   |           |           |           |
|---|-----------|-----------|-----------|
| C | 0.032742  | -0.243905 | -1.700794 |
| C | -1.290352 | 0.456419  | -1.368615 |
| C | -1.912079 | -0.441507 | -0.260331 |
| C | -0.673401 | -1.007587 | 0.491694  |
| C | 0.598054  | -0.624423 | -0.305179 |
| C | 1.373213  | -1.917465 | -0.197221 |
| C | 2.493061  | -1.777676 | 0.792949  |
| C | 2.837748  | -0.279625 | 0.752566  |
| C | 1.417260  | 0.372060  | 0.578593  |
| C | 1.474334  | 1.893330  | 0.309649  |
| C | 0.381232  | 2.513657  | 1.168205  |
| C | 0.594582  | 0.338755  | 1.917447  |
| C | -0.660267 | -2.546918 | 0.557334  |
| C | -2.918807 | 0.308163  | 0.617522  |
| C | -3.876672 | 0.937596  | -0.431511 |
| C | -3.617041 | -0.629022 | 1.597082  |
| C | 3.961097  | 0.043924  | -0.294368 |
| C | 4.459634  | 1.500194  | -0.209243 |
| C | 3.526108  | -0.220444 | -1.740815 |
| C | 5.180691  | -0.843056 | 0.029339  |
| O | -0.201442 | -1.412136 | -2.457764 |
| O | -2.538056 | -1.533112 | -0.929769 |
| O | 1.504825  | 2.360084  | -0.997995 |
| O | -0.043200 | 3.628969  | 1.122575  |
| O | 0.041846  | 1.630170  | 2.139498  |
| O | -0.440602 | -0.588079 | 1.831482  |
| O | 0.529566  | -2.991381 | 0.028564  |
| O | -1.450401 | -3.285280 | 1.054388  |
| O | -3.622985 | 2.121492  | -0.781989 |
| O | -1.046353 | 1.762864  | -0.907307 |
| H | 0.707977  | 0.393538  | -2.271826 |
| H | -1.955878 | 0.468662  | -2.241251 |
| H | 2.089823  | -2.044227 | 1.784434  |
| H | 3.330695  | -2.452808 | 0.611212  |
| H | 3.241464  | 0.040769  | 1.724774  |
| H | 2.389740  | 2.245071  | 0.803292  |
| H | 1.184242  | 0.090972  | 2.806301  |
| H | -2.386086 | 1.098389  | 1.153038  |
| H | -4.291559 | -0.056492 | 2.241211  |
| H | -2.894302 | -1.157421 | 2.225885  |
| H | -4.211809 | -1.365420 | 1.053913  |
| H | 3.758578  | 2.208891  | -0.653462 |
| H | 5.397446  | 1.587992  | -0.769643 |
| H | 4.669787  | 1.795255  | 0.826936  |
| H | 3.121894  | -1.229378 | -1.878836 |
| H | 4.389020  | -0.107191 | -2.408512 |
| H | 2.769667  | 0.506724  | -2.046322 |
| H | 5.445007  | -0.788372 | 1.092954  |
| H | 6.045509  | -0.500492 | -0.548309 |
| H | 5.020131  | -1.892465 | -0.229896 |
| H | 0.559967  | 2.408681  | -1.267823 |
| H | -1.082401 | -1.750644 | -2.205187 |
| H | -3.458799 | -1.211759 | -1.113693 |
| H | -1.968460 | 2.166672  | -0.778789 |
| O | -4.712713 | 0.149584  | -0.931709 |

## C7

|   |           |           |           |
|---|-----------|-----------|-----------|
| C | -0.031411 | -0.233408 | -1.726051 |
| C | -1.347356 | 0.455513  | -1.359571 |
| C | -1.931475 | -0.455967 | -0.241087 |
| C | -0.670912 | -0.990205 | 0.500362  |

|   |           |           |           |
|---|-----------|-----------|-----------|
| C | 0.564908  | -0.626101 | -0.349909 |
| C | 1.347339  | -1.964398 | -0.362969 |
| C | 2.450347  | -1.755470 | 0.612084  |
| C | 2.810876  | -0.308790 | 0.714926  |
| C | 1.410537  | 0.374149  | 0.516482  |
| C | 1.488026  | 1.889341  | 0.210979  |
| C | 0.430593  | 2.552159  | 1.082765  |
| C | 0.613184  | 0.390911  | 1.869312  |
| C | -0.646914 | -2.517953 | 0.655324  |
| C | -2.941484 | 0.280432  | 0.644439  |
| C | -3.912813 | 0.895696  | -0.399136 |
| C | -3.620049 | -0.659010 | 1.635100  |
| C | 4.001120  | 0.052488  | -0.260675 |
| C | 4.536801  | 1.484194  | -0.073431 |
| C | 3.625204  | -0.121511 | -1.735579 |
| C | 5.156010  | -0.906072 | 0.077266  |
| O | -0.281406 | -1.394373 | -2.493332 |
| O | -2.541986 | -1.565078 | -0.896036 |
| O | 1.493381  | 2.335188  | -1.105337 |
| O | 0.031059  | 3.676112  | 1.015757  |
| O | 0.104417  | 1.703841  | 2.085195  |
| O | -0.447361 | -0.498538 | 1.814592  |
| O | 0.462113  | -3.012798 | 0.052981  |
| O | -1.410829 | -3.205364 | 1.263773  |
| O | -3.686027 | 2.087052  | -0.740881 |
| O | -1.089677 | 1.759552  | -0.895938 |
| H | 0.632082  | 0.407214  | -2.308778 |
| H | -2.035637 | 0.472659  | -2.213951 |
| H | 1.664792  | -2.238063 | -1.373854 |
| H | 2.977254  | -2.574248 | 1.085009  |
| H | 3.185823  | -0.062693 | 1.720992  |
| H | 2.417516  | 2.236608  | 0.676483  |
| H | 1.216575  | 0.141615  | 2.747797  |
| H | -2.413153 | 1.078906  | 1.171753  |
| H | -4.300290 | -0.090597 | 2.277094  |
| H | -2.886341 | -1.172278 | 2.263092  |
| H | -4.206284 | -1.409265 | 1.101333  |
| H | 3.916001  | 2.228449  | -0.578005 |
| H | 5.537216  | 1.550480  | -0.517032 |
| H | 4.630566  | 1.749984  | 0.986894  |
| H | 3.354780  | -1.154952 | -1.971935 |
| H | 4.485046  | 0.141878  | -2.363456 |
| H | 2.799273  | 0.541996  | -2.006967 |
| H | 5.444075  | -0.824159 | 1.132991  |
| H | 6.033802  | -0.660894 | -0.530518 |
| H | 4.890667  | -1.947752 | -0.124676 |
| H | 0.543492  | 2.408592  | -1.346498 |
| H | -1.140251 | -1.755256 | -2.194714 |
| H | -3.469588 | -1.258576 | -1.075199 |
| H | -2.006295 | 2.161675  | -0.749095 |
| O | -4.729996 | 0.090945  | -0.906223 |

# C8

|   |           |           |           |
|---|-----------|-----------|-----------|
| C | -0.141028 | -0.160577 | -1.782437 |
| C | -1.437145 | 0.521651  | -1.337671 |
| C | -1.976666 | -0.421353 | -0.220337 |
| C | -0.689311 | -1.003068 | 0.438110  |
| C | 0.501774  | -0.608235 | -0.448061 |
| C | 1.281674  | -1.937855 | -0.548715 |
| C | 2.409113  | -1.826679 | 0.486975  |
| C | 2.754313  | -0.359287 | 0.454293  |
| C | 1.403739  | 0.357633  | 0.408992  |
| C | 1.462014  | 1.879987  | 0.157375  |
| C | 0.429643  | 2.504694  | 1.083697  |
| C | 0.663406  | 0.321480  | 1.801824  |
| C | -0.676438 | -2.540055 | 0.486509  |
| C | -2.933235 | 0.292269  | 0.738991  |
| C | -3.953734 | 0.947445  | -0.231909 |
| C | -3.566595 | -0.676963 | 1.731139  |
| C | 4.061792  | 0.029284  | -0.236401 |
| C | 4.425152  | 1.523743  | -0.255136 |
| C | 4.000737  | -0.438261 | -1.707025 |
| C | 5.223746  | -0.689576 | 0.478001  |
| O | -0.426736 | -1.288270 | -2.586252 |
| O | -2.630514 | -1.499909 | -0.884620 |
| O | 1.431379  | 2.357547  | -1.146897 |
| O | 0.026884  | 3.629304  | 1.076245  |

|   |           |           |           |
|---|-----------|-----------|-----------|
| O | 0.138290  | 1.617389  | 2.065208  |
| O | -0.378848 | -0.593898 | 1.766130  |
| O | 0.382640  | -2.998858 | -0.231274 |
| O | -1.403083 | -3.263389 | 1.098124  |
| O | -3.735187 | 2.147071  | -0.548061 |
| O | -1.153277 | 1.811381  | -0.852976 |
| H | 0.512035  | 0.496128  | -2.360425 |
| H | -2.164002 | 0.563100  | -2.158624 |
| H | 1.647106  | -2.120601 | -1.560146 |
| H | 1.990665  | -2.111659 | 1.464398  |
| H | 3.235477  | -2.507437 | 0.276063  |
| H | 2.399446  | 2.217637  | 0.609285  |
| H | 1.312447  | 0.063609  | 2.643980  |
| H | -2.373055 | 1.070601  | 1.263913  |
| H | -4.203593 | -0.127063 | 2.430958  |
| H | -2.805222 | -1.220167 | 2.298524  |
| H | -4.190119 | -1.400681 | 1.203096  |
| H | 3.750124  | 2.111203  | -0.882056 |
| H | 5.432632  | 1.624325  | -0.675065 |
| H | 4.450680  | 1.948772  | 0.754543  |
| H | 3.869638  | -1.522833 | -1.782929 |
| H | 4.931309  | -0.176910 | -2.225371 |
| H | 3.170392  | 0.053409  | -2.226812 |
| H | 5.292899  | -0.362015 | 1.521021  |
| H | 6.169888  | -0.448470 | -0.019555 |
| H | 5.116103  | -1.777043 | 0.471377  |
| H | 0.476128  | 2.452139  | -1.355039 |
| H | -1.269590 | -1.664001 | -2.263308 |
| H | -3.563285 | -1.180848 | -1.005154 |
| H | -2.058538 | 2.212356  | -0.646570 |
| O | -4.804359 | 0.164962  | -0.718464 |

# C8tBu

|   |           |           |           |
|---|-----------|-----------|-----------|
| C | 0.035619  | -0.222630 | -1.694920 |
| C | -1.294927 | 0.454095  | -1.358782 |
| C | -1.895915 | -0.458834 | -0.251371 |
| C | -0.646242 | -0.988768 | 0.512945  |
| C | 0.602409  | -0.608781 | -0.306686 |
| C | 1.403693  | -1.931421 | -0.289165 |
| C | 2.419142  | -1.754564 | 0.839518  |
| C | 2.814123  | -0.273607 | 0.771801  |
| C | 1.416780  | 0.399935  | 0.572178  |
| C | 1.493454  | 1.915637  | 0.271861  |
| C | 0.408019  | 2.568927  | 1.116780  |
| C | 0.591541  | 0.409088  | 1.907576  |
| C | -0.615494 | -2.521268 | 0.631570  |
| C | -2.927480 | 0.268899  | 0.615921  |
| C | -3.883849 | 0.879297  | -0.444510 |
| C | -3.617010 | -0.678935 | 1.590967  |
| C | 3.929929  | 0.021247  | -0.308283 |
| C | 4.515552  | 1.444910  | -0.155284 |
| C | 3.444232  | -0.121452 | -1.720402 |
| C | 5.094665  | -0.960451 | -0.073814 |
| O | -0.177102 | -1.383011 | -2.473632 |
| O | -2.485945 | -1.570970 | -0.919882 |
| O | 1.523647  | 2.363354  | -1.043819 |
| O | 0.006059  | 3.691689  | 1.045165  |
| O | 0.048870  | 1.711246  | 2.100243  |
| O | -0.444559 | -0.510696 | 1.838402  |
| O | 0.495151  | -2.993470 | 0.010632  |
| O | -1.375713 | -3.227872 | 1.222660  |
| O | -3.657463 | 2.072001  | -0.781797 |
| O | -1.056505 | 1.761793  | -0.892562 |
| H | 0.707298  | 0.427362  | -2.255795 |
| H | -1.965346 | 0.464772  | -2.227282 |
| H | 1.845750  | -2.161601 | -1.257359 |
| H | 1.890122  | -1.940490 | 1.783906  |
| H | 3.245949  | -2.463980 | 0.797216  |
| H | 3.239288  | 0.055358  | 1.732172  |
| H | 2.413165  | 2.266872  | 0.757060  |
| H | 1.181402  | 0.182554  | 2.802514  |
| H | -2.415571 | 1.070203  | 1.155125  |
| H | -4.312508 | -0.118225 | 2.223310  |
| H | -2.890767 | -1.189470 | 2.230017  |
| H | -4.188232 | -1.431081 | 1.043823  |
| H | 3.859527  | 2.209622  | -0.575228 |
| H | 5.461122  | 1.501626  | -0.704830 |

|   |           |           |           |
|---|-----------|-----------|-----------|
| H | 4.724362  | 1.682911  | 0.895484  |
| H | 3.655731  | -1.011775 | -2.301865 |
| H | 2.919104  | 0.700147  | -2.190650 |
| H | 5.405949  | -0.963670 | 0.977931  |
| H | 5.953989  | -0.662575 | -0.682679 |
| H | 4.835412  | -1.983960 | -0.357042 |
| H | 0.578342  | 2.421999  | -1.307246 |
| H | -1.032148 | -1.764071 | -2.192070 |
| H | -3.411313 | -1.270729 | -1.118089 |
| H | -1.978647 | 2.156758  | -0.762872 |
| O | -4.688236 | 0.070639  | -0.965437 |

# C10

|   |           |           |           |
|---|-----------|-----------|-----------|
| C | 0.024773  | -0.247606 | -1.679845 |
| C | -1.322817 | 0.428794  | -1.402325 |
| C | -1.936878 | -0.445065 | -0.270216 |
| C | -0.710231 | -0.840467 | 0.594671  |
| C | 0.557018  | -0.651831 | -0.271425 |
| C | 1.259840  | -2.020486 | -0.222528 |
| C | 2.494859  | -1.851456 | 0.673735  |
| C | 2.863512  | -0.350509 | 0.678016  |
| C | 1.450125  | 0.309880  | 0.551915  |
| C | 1.328514  | 1.765680  | 0.255728  |
| C | 0.956181  | 2.515254  | 1.443062  |
| C | 0.751618  | 0.315901  | 1.952690  |
| C | -0.688190 | -2.325940 | 0.992162  |
| C | -3.059137 | 0.286084  | 0.473888  |
| C | -3.974255 | 0.755125  | -0.687765 |
| C | -3.760438 | -0.605607 | 1.491273  |
| C | 3.966754  | 0.068946  | -0.331470 |
| C | 4.394946  | 1.523617  | -0.074792 |
| C | 3.521393  | -0.073228 | -1.790020 |
| C | 5.208530  | -0.809760 | -0.099108 |
| O | -0.171214 | -1.391632 | -2.485924 |
| O | -2.418742 | -1.639052 | -0.881045 |
| O | 1.373484  | 2.330690  | -0.957703 |
| O | 0.820150  | 3.702447  | 1.588623  |
| O | 0.819538  | 1.615157  | 2.481826  |
| O | -0.591827 | -0.018702 | 1.739531  |
| O | 0.335824  | -2.953915 | 0.357616  |
| O | -1.400881 | -2.889306 | 1.769684  |
| O | -3.798587 | 1.934531  | -1.095704 |
| O | -1.167385 | 1.777775  | -1.009309 |
| H | 0.710269  | 0.407311  | -2.216645 |
| H | -1.961195 | 0.364723  | -2.292214 |
| H | 1.487553  | -2.392144 | -1.220875 |
| H | 2.206584  | -2.161382 | 1.684938  |
| H | 3.315931  | -2.504796 | 0.373544  |
| H | 3.263356  | -0.080709 | 1.666896  |
| H | 1.213385  | -0.354248 | 2.687763  |
| H | -2.621783 | 1.157004  | 0.965378  |
| H | -4.552766 | -0.041173 | 1.992867  |
| H | -3.057558 | -0.975597 | 2.242946  |
| H | -4.219458 | -1.462686 | 0.994198  |
| H | 3.610297  | 2.242987  | -0.315317 |
| H | 5.260834  | 1.766887  | -0.701682 |
| H | 4.689988  | 1.666026  | 0.971852  |
| H | 3.130668  | -1.075133 | -2.004848 |
| H | 4.374058  | 0.097611  | -2.458026 |
| H | 2.753414  | 0.664330  | -2.034992 |
| H | 5.485309  | -0.835828 | 0.961970  |
| H | 6.057932  | -0.402209 | -0.658006 |
| H | 5.061627  | -1.838958 | -0.438979 |
| H | 0.424250  | 2.505765  | -1.198382 |
| H | -0.996868 | -1.811872 | -2.171528 |
| H | -3.349481 | -1.411971 | -1.147240 |
| H | -2.114391 | 2.122979  | -0.973260 |
| O | -4.688695 | -0.140189 | -1.198765 |

# C12

|   |           |           |           |
|---|-----------|-----------|-----------|
| C | -0.028042 | -0.205354 | -1.730653 |
| C | -1.343848 | 0.474304  | -1.345469 |
| C | -1.927169 | -0.459533 | -0.247053 |
| C | -0.662232 | -0.995206 | 0.487107  |
| C | 0.571200  | -0.614500 | -0.363486 |
| C | 1.360947  | -1.940253 | -0.368533 |
| C | 2.409161  | -1.778679 | 0.733298  |

|   |           |           |           |
|---|-----------|-----------|-----------|
| C | 2.807593  | -0.293811 | 0.716455  |
| C | 1.406188  | 0.393732  | 0.504646  |
| C | 1.505184  | 1.916981  | 0.218289  |
| C | 0.491401  | 2.588752  | 1.136648  |
| C | 0.572568  | 0.422369  | 1.794854  |
| C | -0.629671 | -2.521927 | 0.619633  |
| C | -2.942654 | 0.256516  | 0.649699  |
| C | -3.910929 | 0.888370  | -0.386625 |
| C | -3.620227 | -0.703032 | 1.621208  |
| C | 3.982770  | 0.026713  | -0.274986 |
| C | 4.495105  | 1.478237  | -0.162083 |
| C | 3.631428  | -0.211661 | -1.748457 |
| C | 5.175791  | -0.873136 | 0.101472  |
| O | -0.267281 | -1.349292 | -2.524369 |
| O | -2.528481 | -1.562394 | -0.918164 |
| O | 1.485743  | 2.381352  | -1.090271 |
| O | 0.127456  | 3.724316  | 1.130555  |
| O | 0.144837  | 1.701089  | 2.117955  |
| O | -0.450272 | -0.469507 | 1.803296  |
| O | 0.452653  | -2.998341 | -0.042110 |
| O | -1.374366 | -3.221187 | 1.239027  |
| O | -3.683197 | 2.086196  | -0.705307 |
| O | -1.085443 | 1.766690  | -0.843087 |
| H | 0.629860  | 0.453266  | -2.299686 |
| H | -2.033701 | 0.516434  | -2.197291 |
| H | 1.759824  | -2.183193 | -1.351142 |
| H | 1.908682  | -1.993273 | 1.686300  |
| H | 3.234452  | -2.485373 | 0.641353  |
| H | 3.173530  | 0.000048  | 1.710542  |
| H | 2.452298  | 2.237900  | 0.662930  |
| H | -2.419795 | 1.047750  | 1.192821  |
| H | -4.301666 | -0.148369 | 2.273687  |
| H | -2.886574 | -1.227498 | 2.240198  |
| H | -4.205020 | -1.443717 | 1.072695  |
| H | 3.852816  | 2.188428  | -0.687936 |
| H | 5.484684  | 1.541795  | -0.628847 |
| H | 4.606111  | 1.792599  | 0.883072  |
| H | 3.435940  | -1.265296 | -1.965326 |
| H | 4.476532  | 0.094732  | -2.376724 |
| H | 2.765818  | 0.387647  | -2.045797 |
| H | 5.428698  | -0.772382 | 1.164128  |
| H | 6.055566  | -0.580971 | -0.481899 |
| H | 4.989638  | -1.929700 | -0.105775 |
| H | 0.532494  | 2.431793  | -1.322361 |
| H | -1.113490 | -1.735579 | -2.223540 |
| H | -3.457106 | -1.258819 | -1.096402 |
| H | -2.005018 | 2.164312  | -0.699564 |
| O | -4.723686 | 0.091527  | -0.911866 |

# C14

|   |           |           |           |
|---|-----------|-----------|-----------|
| C | 0.003787  | -0.256233 | -1.787950 |
| C | -1.324238 | 0.420893  | -1.446724 |
| C | -1.921835 | -0.491226 | -0.336305 |
| C | -0.673353 | -1.065978 | 0.399211  |
| C | 0.575674  | -0.653087 | -0.403346 |
| C | 1.390400  | -1.965470 | -0.412921 |
| C | 2.421421  | -1.808991 | 0.705198  |
| C | 2.781698  | -0.312941 | 0.728630  |
| C | 1.372698  | 0.343712  | 0.507397  |
| C | 1.416776  | 1.864366  | 0.239846  |
| C | 0.289610  | 2.474029  | 1.064275  |
| C | 0.525851  | 0.311778  | 1.830643  |
| C | -0.639759 | -2.601751 | 0.461834  |
| C | -2.925370 | 0.203198  | 0.520737  |
| C | -3.929502 | 0.929438  | -0.361174 |
| C | -3.380224 | -0.446524 | 1.791993  |
| C | 3.972321  | 0.057903  | -0.223857 |
| C | 4.419768  | 1.527217  | -0.083482 |
| C | 3.673096  | -0.187148 | -1.707221 |
| C | 5.187560  | -0.796733 | 0.184762  |
| O | -0.213734 | -1.417981 | -2.566750 |
| O | -2.549406 | -1.602625 | -1.017557 |
| O | 1.475177  | 2.324785  | -1.070320 |
| O | -0.122294 | 3.594263  | 1.016892  |
| O | -0.086450 | 1.582222  | 2.011251  |
| O | -0.456465 | -0.662132 | 1.745366  |
| O | 0.497253  | -3.045283 | -0.125666 |

|   |           |           |           |
|---|-----------|-----------|-----------|
| O | -1.415170 | -3.332911 | 1.002846  |
| O | -3.594613 | 2.057001  | -0.828316 |
| O | -1.086812 | 1.719258  | -0.976797 |
| H | 0.669438  | 0.397018  | -2.354019 |
| H | -1.997708 | 0.429720  | -2.313929 |
| H | 1.812865  | -2.179860 | -1.392681 |
| H | 1.917128  | -2.070879 | 1.644405  |
| H | 3.267601  | -2.488964 | 0.599566  |
| H | 3.131101  | -0.032437 | 1.733796  |
| H | 2.309526  | 2.233349  | 0.759072  |
| H | 1.111311  | 0.109887  | 2.734244  |
| H | -3.003883 | 0.097338  | 2.667450  |
| H | -3.019970 | -1.478976 | 1.869807  |
| H | -4.473943 | -0.451173 | 1.822031  |
| H | 3.752752  | 2.216536  | -0.605241 |
| H | 5.412094  | 1.639193  | -0.535313 |
| H | 4.504294  | 1.827849  | 0.968328  |
| H | 3.521334  | -1.247037 | -1.930251 |
| H | 4.524648  | 0.150694  | -2.316    |
| H | 2.795601  | 0.382701  | -2.026162 |
| H | 5.410027  | -0.684272 | 1.253137  |
| H | 6.070254  | -0.472313 | -0.376742 |
| H | 5.047174  | -1.860203 | -0.023759 |
| H | 0.533294  | 2.378347  | -1.350998 |
| H | -1.084557 | -1.780318 | -2.314225 |
| H | -3.490664 | -1.345416 | -1.111779 |
| H | -2.033751 | 2.094541  | -0.815495 |
| O | -4.947351 | 0.258643  | -0.627262 |

#### C14Me

|   |           |           |           |
|---|-----------|-----------|-----------|
| C | -0.020036 | -0.205441 | -1.720801 |
| C | -1.340610 | 0.479283  | -1.359245 |
| C | -1.921672 | -0.435143 | -0.245095 |
| C | -0.666319 | -0.977537 | 0.495400  |
| C | 0.571906  | -0.603612 | -0.343056 |
| C | 1.356730  | -1.934057 | -0.354315 |
| C | 2.419259  | -1.781852 | 0.735257  |
| C | 2.813879  | -0.294530 | 0.725117  |
| C | 1.413400  | 0.389147  | 0.528545  |
| C | 1.485859  | 1.904082  | 0.228502  |
| C | 0.414352  | 2.561408  | 1.086470  |
| C | 0.604105  | 0.401146  | 1.876320  |
| C | -0.650056 | -2.509565 | 0.610396  |
| C | -2.929284 | 0.296287  | 0.670188  |
| C | -3.922850 | 0.897354  | -0.365788 |
| C | -3.556401 | -0.636014 | 1.641723  |
| C | 3.989554  | 0.029963  | -0.262474 |
| C | 4.463897  | 1.495175  | -0.180314 |
| C | 3.656355  | -0.259119 | -1.730575 |
| C | 5.200265  | -0.829563 | 0.149579  |
| O | -0.259724 | -1.362137 | -2.497195 |
| O | -2.537467 | -1.536461 | -0.901578 |
| O | 1.502476  | 2.342705  | -1.090577 |
| O | 0.015609  | 3.685733  | 1.021168  |
| O | 0.071588  | 1.706512  | 2.078468  |
| O | -0.439134 | -0.510242 | 1.820061  |
| O | 0.449145  | -2.988772 | -0.026636 |
| O | -1.407388 | -3.210050 | 1.211045  |
| O | -3.694890 | 2.080202  | -0.729881 |
| O | -1.089468 | 1.784820  | -0.895816 |
| H | 0.642301  | 0.441813  | -2.297191 |
| H | -2.026116 | 0.493018  | -2.215621 |
| H | 1.748846  | -2.171237 | -1.341189 |
| H | 1.933372  | -2.017868 | 1.691262  |
| H | 3.246833  | -2.482978 | 0.620507  |
| H | 3.194269  | -0.004125 | 1.716222  |
| H | 2.408124  | 2.258400  | 0.703430  |
| H | 1.204262  | 0.169372  | 2.762733  |
| H | -2.387514 | 1.096108  | 1.183259  |
| H | -3.029966 | -0.910470 | 2.547342  |
| H | -4.403880 | -1.227999 | 1.322213  |
| H | 3.797243  | 2.179192  | -0.709705 |
| H | 5.447410  | 1.574705  | -0.657542 |
| H | 4.578135  | 1.828498  | 0.858749  |
| H | 3.496050  | -1.324764 | -1.916890 |
| H | 4.495112  | 0.056521  | -2.362475 |
| H | 2.773305  | 0.302604  | -2.049137 |

|   |           |           |           |
|---|-----------|-----------|-----------|
| H | 5.453715  | -0.675640 | 1.205764  |
| H | 6.072815  | -0.545588 | -0.448547 |
| H | 5.035846  | -1.898134 | -0.008843 |
| H | 0.555266  | 2.425665  | -1.337686 |
| H | -1.115669 | -1.733106 | -2.204512 |
| H | -3.477134 | -1.249819 | -1.040902 |
| H | -2.006879 | 2.180005  | -0.747059 |
| O | -4.751475 | 0.085371  | -0.838775 |

#### C10H

|   |           |           |           |
|---|-----------|-----------|-----------|
| C | 0.003464  | -0.217510 | -1.721871 |
| C | -1.349899 | 0.462996  | -1.372439 |
| C | -1.924977 | -0.453424 | -0.254622 |
| C | -0.664763 | -1.008423 | 0.475317  |
| C | 0.581368  | -0.627176 | -0.346654 |
| C | 1.366843  | -1.957231 | -0.366627 |
| C | 2.436687  | -1.805701 | 0.716631  |
| C | 2.821206  | -0.315553 | 0.718743  |
| C | 1.415976  | 0.359610  | 0.533891  |
| C | 1.471113  | 1.877235  | 0.246300  |
| C | 0.393969  | 2.514660  | 1.112810  |
| C | 0.606225  | 0.348300  | 1.881247  |
| C | -0.649894 | -2.543029 | 0.567658  |
| C | -2.908009 | 0.303854  | 0.649508  |
| C | -3.893424 | 0.951714  | -0.361534 |
| C | -3.590293 | -0.631329 | 1.641421  |
| C | 3.988696  | 0.028247  | -0.271584 |
| C | 4.453923  | 1.495354  | -0.173051 |
| C | 3.647236  | -0.242498 | -1.741314 |
| C | 5.206991  | -0.829846 | 0.120099  |
| O | -0.216471 | -1.289397 | -2.532215 |
| O | -2.545145 | -1.543215 | -0.900569 |
| O | 1.475585  | 2.325435  | -1.070624 |
| O | -0.018446 | 3.634202  | 1.056615  |
| O | 0.066743  | 1.648015  | 2.099877  |
| O | -0.429530 | -0.569296 | 1.810028  |
| O | 0.467933  | -3.014773 | -0.041188 |
| O | -1.413712 | -3.250132 | 1.151563  |
| O | -3.602594 | 2.123913  | -0.748293 |
| O | -1.098774 | 1.766366  | -0.924045 |
| H | 0.619174  | 0.507308  | -2.276111 |
| H | -2.021406 | 0.453111  | -2.238269 |
| H | 1.760496  | -2.188908 | -1.355651 |
| H | 1.957579  | -2.054786 | 1.672466  |
| H | 3.268365  | -2.499856 | 0.589969  |
| H | 3.203969  | -0.032203 | 1.710873  |
| H | 2.390516  | 2.238794  | 0.721490  |
| H | 1.206630  | 0.108181  | 2.765103  |
| H | -2.356071 | 1.087658  | 1.174745  |
| H | -4.242434 | -0.054915 | 2.305043  |
| H | -2.857991 | -1.172892 | 2.246827  |
| H | -4.207102 | -1.356598 | 1.108219  |
| H | 3.780028  | 2.181767  | -0.690119 |
| H | 5.434423  | 1.587948  | -0.654014 |
| H | 4.570659  | 1.815984  | 0.869645  |
| H | 3.484911  | -1.305652 | -1.940222 |
| H | 4.482359  | 0.080318  | -2.374300 |
| H | 2.764036  | 0.326264  | -2.047257 |
| H | 5.465203  | -0.690723 | 1.177109  |
| H | 6.074429  | -0.531186 | -0.478255 |
| H | 5.048139  | -1.896846 | -0.053864 |
| H | 0.522883  | 2.421366  | -1.300926 |
| H | -3.465211 | -1.242430 | -1.080362 |
| H | -2.047231 | 2.155485  | -0.775520 |
| O | -4.794268 | 0.209144  | -0.798532 |

#### C20H

|   |           |           |           |
|---|-----------|-----------|-----------|
| C | -0.001618 | -0.268795 | -1.726985 |
| C | -1.324555 | 0.441912  | -1.366399 |
| C | -1.912637 | -0.478881 | -0.253944 |
| C | -0.660498 | -1.051845 | 0.469894  |
| C | 0.582660  | -0.658494 | -0.351264 |
| C | 1.390842  | -1.975001 | -0.354472 |
| C | 2.454787  | -1.799282 | 0.729549  |
| C | 2.814171  | -0.302219 | 0.716595  |
| C | 1.397061  | 0.346724  | 0.529103  |
| C | 1.424912  | 1.866719  | 0.242756  |



|   |           |           |           |
|---|-----------|-----------|-----------|
| C | 0.354185  | 2.489451  | 1.129148  |
| C | 0.592567  | 0.317732  | 1.878481  |
| C | -0.633691 | -2.585419 | 0.558404  |
| C | -2.852980 | 0.310892  | 0.654333  |
| C | -3.762965 | 1.038793  | -0.345861 |
| C | -3.614473 | -0.590113 | 1.618054  |
| C | 3.974554  | 0.055311  | -0.277507 |
| C | 4.425343  | 1.526474  | -0.170880 |
| C | 3.630657  | -0.204512 | -1.748335 |
| C | 5.201257  | -0.795627 | 0.103286  |
| O | -0.260951 | -1.438735 | -2.481828 |
| O | -2.589207 | -1.569234 | -0.884824 |
| O | 1.407772  | 2.314730  | -1.071914 |
| O | -0.046019 | 3.612919  | 1.114401  |
| O | 0.038257  | 1.602923  | 2.110862  |
| O | -0.431567 | -0.620109 | 1.806327  |
| O | 0.501755  | -3.045122 | -0.020234 |
| O | -1.415511 | -3.302231 | 1.109014  |
| O | -3.283691 | 2.109353  | -0.859073 |
| O | -1.112208 | 1.701974  | -0.883107 |
| H | 0.662341  | 0.361676  | -2.318356 |
| H | -1.989366 | 0.433577  | -2.247703 |
| H | 1.785163  | -2.211971 | -1.340884 |
| H | 1.978165  | -2.045018 | 1.687540  |
| H | 3.298289  | -2.480751 | 0.612074  |
| H | 3.193979  | -0.004987 | 1.705920  |
| H | 2.345750  | 2.239819  | 0.706314  |
| H | 1.199826  | 0.073964  | 2.757086  |
| H | -2.256694 | 1.053592  | 1.185321  |
| H | -4.220651 | 0.016041  | 2.297592  |
| H | -2.920105 | -1.198576 | 2.204508  |
| H | -4.287114 | -1.255719 | 1.074210  |
| H | 3.742001  | 2.207267  | -0.683201 |
| H | 5.403770  | 1.632589  | -0.653495 |
| H | 4.539549  | 1.843390  | 0.873244  |
| H | 3.457060  | -1.264313 | -1.955006 |
| H | 4.469958  | 0.113841  | -2.378429 |
| H | 2.753186  | 0.374837  | -2.049006 |
| H | 5.454543  | -0.674443 | 1.163847  |
| H | 6.067392  | -0.476413 | -0.486327 |
| H | 5.054343  | -1.860782 | -0.092164 |
| H | 0.446823  | 2.363408  | -1.304442 |
| H | -1.133744 | -1.777136 | -2.205140 |
| H | -3.483562 | -1.235311 | -1.098280 |
| O | -4.827096 | 0.502828  | -0.688045 |

### C3OH

|   |           |           |           |
|---|-----------|-----------|-----------|
| C | 0.040542  | -0.234348 | -1.778540 |
| C | -1.204394 | 0.619321  | -1.530732 |
| C | -1.993007 | -0.575944 | -0.248190 |
| C | -0.658229 | -1.016083 | 0.443612  |
| C | 0.581956  | -0.624130 | -0.385087 |
| C | 1.382294  | -1.948985 | -0.395637 |
| C | 2.432325  | -1.800856 | 0.705375  |
| C | 2.818179  | -0.312165 | 0.713843  |
| C | 1.416994  | 0.366728  | 0.501153  |
| C | 1.494164  | 1.882834  | 0.213263  |
| C | 0.398056  | 2.530758  | 1.047251  |
| C | 0.593641  | 0.369596  | 1.836800  |
| C | -0.628752 | -2.552108 | 0.529033  |
| C | -2.929757 | 0.257370  | 0.639929  |
| C | -4.027221 | 0.958401  | -0.169358 |
| C | -3.566762 | -0.673946 | 1.672569  |
| C | 4.014051  | 0.027335  | -0.244664 |
| C | 4.485346  | 1.491428  | -0.130883 |
| C | 3.713883  | -0.239106 | -1.723617 |
| C | 5.216159  | -0.838146 | 0.180702  |
| O | -0.263886 | -1.382087 | -2.531493 |
| O | -2.501129 | -1.473172 | -1.009087 |
| O | 1.539412  | 2.325321  | -1.102261 |
| O | 0.001955  | 3.656297  | 0.992412  |
| O | 0.027978  | 1.662823  | 2.021735  |
| O | -0.426486 | -0.566780 | 1.774353  |
| O | 0.484819  | -3.016678 | -0.086273 |
| O | -1.404660 | -3.266132 | 1.091376  |
| O | -3.647641 | 2.014915  | -0.895307 |
| O | -1.033226 | 1.773964  | -0.968500 |

|   |           |           |           |
|---|-----------|-----------|-----------|
| H | 0.774033  | 0.341031  | -2.351206 |
| H | -1.970643 | 0.535691  | -2.316831 |
| H | 1.786948  | -2.172169 | -1.381293 |
| H | 1.937434  | -2.048389 | 1.653711  |
| H | 3.264429  | -2.496898 | 0.592481  |
| H | 3.178276  | -0.028772 | 1.714512  |
| H | 2.403985  | 2.236016  | 0.712844  |
| H | 1.187374  | 0.155321  | 2.732096  |
| H | -2.324935 | 1.028466  | 1.131997  |
| H | -4.228937 | -0.110314 | 2.335352  |
| H | -2.797420 | -1.173862 | 2.265240  |
| H | -4.159165 | -1.429573 | 1.153304  |
| H | 3.828017  | 2.182305  | -0.662935 |
| H | 5.478140  | 1.579161  | -0.587071 |
| H | 4.578001  | 1.809033  | 0.915271  |
| H | 3.533262  | -1.298503 | -1.926576 |
| H | 4.576296  | 0.063680  | -2.329658 |
| H | 2.853390  | 0.348241  | -2.056385 |
| H | 5.440194  | -0.708595 | 1.246798  |
| H | 6.103760  | -0.537967 | -0.386549 |
| H | 5.059727  | -1.903146 | -0.007212 |
| H | 0.587845  | 2.371143  | -1.359100 |
| H | -1.112685 | -1.728570 | -2.172758 |
| H | -2.660673 | 2.143456  | -0.844374 |
| O | -5.185316 | 0.619234  | -0.132085 |

### C10OH

|   |           |           |           |
|---|-----------|-----------|-----------|
| C | -0.046100 | -0.148185 | -1.719791 |
| C | -1.360444 | 0.517589  | -1.310273 |
| C | -1.933086 | -0.441179 | -0.230045 |
| C | -0.663655 | -0.973649 | 0.494151  |
| C | 0.562292  | -0.591547 | -0.363186 |
| C | 1.339927  | -1.922735 | -0.406827 |
| C | 2.401310  | -1.796899 | 0.688684  |
| C | 2.812255  | -0.313744 | 0.706409  |
| C | 1.418590  | 0.385388  | 0.505644  |
| C | 1.489343  | 1.887447  | 0.172677  |
| C | 0.436368  | 2.596256  | 1.041008  |
| C | 0.605802  | 0.426668  | 1.847430  |
| C | -0.637456 | -2.505542 | 0.599179  |
| C | -2.960434 | 0.242803  | 0.676154  |
| C | -3.941705 | 0.869601  | -0.352116 |
| C | -3.620074 | -0.741495 | 1.635576  |
| C | 4.001390  | 0.006564  | -0.266580 |
| C | 4.493084  | 1.466362  | -0.172624 |
| C | 3.679748  | -0.281800 | -1.737826 |
| C | 5.202412  | -0.861289 | 0.157837  |
| O | -0.273118 | -1.274987 | -2.540721 |
| O | -2.515264 | -1.543060 | -0.921510 |
| O | 1.549455  | 2.315346  | -1.108077 |
| O | 0.116124  | 3.742586  | 1.000693  |
| O | 0.064699  | 1.737879  | 2.014417  |
| O | -0.421640 | -0.497337 | 1.814494  |
| O | 0.429183  | -2.979150 | -0.095122 |
| O | -1.365727 | -3.213551 | 1.227290  |
| O | -3.774049 | 2.083748  | -0.619153 |
| O | -1.078697 | 1.788430  | -0.786284 |
| H | 0.595785  | 0.544004  | -2.267538 |
| H | -2.056303 | 0.577131  | -2.156775 |
| H | 1.729124  | -2.142373 | -1.398960 |
| H | 1.909905  | -2.042517 | 1.639409  |
| H | 3.222011  | -2.504692 | 0.566772  |
| H | 3.187316  | -0.043785 | 1.705257  |
| H | 2.412153  | 2.281975  | 0.640528  |
| H | 1.206292  | 0.228421  | 2.741840  |
| H | -2.452709 | 1.037382  | 1.228409  |
| H | -4.322133 | -0.210543 | 2.286417  |
| H | -2.878223 | -1.251410 | 2.257530  |
| H | -4.179172 | -1.494025 | 1.076202  |
| H | 3.875391  | 2.157826  | -0.749300 |
| H | 5.504044  | 1.529263  | -0.589993 |
| H | 4.548050  | 1.815318  | 0.866545  |
| H | 3.542509  | -1.350432 | -1.925218 |
| H | 4.512827  | 0.053049  | -2.367168 |
| H | 2.782455  | 0.255609  | -2.060857 |
| H | 5.459512  | -0.692046 | 1.210701  |
| H | 6.077057  | -0.598527 | -0.446785 |

|   |           |           |           |
|---|-----------|-----------|-----------|
| H | 5.024817  | -1.929852 | 0.018347  |
| H | -1.118121 | -1.670413 | -2.246540 |
| H | -3.448413 | -1.238707 | -1.098725 |
| H | -1.972500 | 2.201315  | -0.629192 |
| O | -4.705420 | 0.045464  | -0.919182 |

# 1B radical (SET)

|   |           |           |           |
|---|-----------|-----------|-----------|
| C | -0.062093 | -0.170339 | -1.661434 |
| C | -1.392762 | 0.471085  | -1.232412 |
| C | -1.911920 | -0.458109 | -0.100184 |
| C | -0.596589 | -1.002656 | 0.568126  |
| C | 0.589458  | -0.597946 | -0.319163 |
| C | 1.375930  | -1.928345 | -0.397555 |
| C | 2.454342  | -1.815033 | 0.678143  |
| C | 2.862559  | -0.331459 | 0.699642  |
| C | 1.466349  | 0.374137  | 0.547778  |
| C | 1.542238  | 1.892047  | 0.267495  |
| C | 0.443315  | 2.527720  | 1.101556  |
| C | 0.685141  | 0.382934  | 1.911540  |
| C | -0.577222 | -2.538199 | 0.639285  |
| C | -2.820615 | 0.165128  | 0.902888  |
| C | -4.521825 | 1.238909  | -1.213160 |
| C | -3.664083 | -0.725450 | 1.751208  |
| C | 4.021401  | 0.010283  | -0.300782 |
| C | 4.505601  | 1.469834  | -0.183136 |
| C | 3.659252  | -0.244750 | -1.769033 |
| C | 5.232601  | -0.867253 | 0.069560  |
| O | -0.278727 | -1.274667 | -2.506243 |
| O | -2.490374 | -1.590323 | -0.750095 |
| O | 1.575277  | 2.340587  | -1.050257 |
| O | -0.022223 | 3.623562  | 0.986759  |
| O | 0.098119  | 1.672517  | 2.087799  |
| O | -0.333944 | -0.561612 | 1.885954  |
| O | 0.462501  | -2.992064 | -0.094043 |
| O | -1.311761 | -3.237726 | 1.268379  |
| O | -4.097618 | 2.307484  | -1.037465 |
| O | -1.096453 | 1.773950  | -0.791576 |
| H | 0.551270  | 0.536969  | -2.218942 |
| H | -2.097905 | 0.482185  | -2.076794 |
| H | 1.748665  | -2.130934 | -1.398651 |
| H | 1.988047  | -2.078183 | 1.637002  |
| H | 3.274387  | -2.515946 | 0.524373  |
| H | 3.261717  | -0.072809 | 1.691040  |
| H | 2.458010  | 2.240261  | 0.760477  |
| H | 1.300289  | 0.187177  | 2.793737  |
| H | -2.492594 | 1.114208  | 1.317934  |
| H | -4.331662 | -0.148457 | 2.394386  |
| H | -3.021004 | -1.350447 | 2.389530  |
| H | -4.258779 | -1.418423 | 1.148161  |
| H | 3.843140  | 2.176804  | -0.686781 |
| H | 5.483628  | 1.556268  | -0.668004 |
| H | 4.636499  | 1.771725  | 0.863489  |
| H | 3.517803  | -1.308537 | -1.981059 |
| H | 4.477504  | 0.101643  | -2.410026 |
| H | 2.760757  | 0.308396  | -2.060615 |
| H | 5.510064  | -0.736923 | 1.122372  |
| H | 6.093725  | -0.576560 | -0.540328 |
| H | 5.059843  | -1.931199 | -0.109042 |
| H | 0.660349  | 2.582759  | -1.279771 |
| H | -0.987783 | -1.820572 | -2.122318 |
| H | -3.364093 | -1.335624 | -1.089762 |
| H | -1.903615 | 2.243113  | -0.524306 |
| O | -4.942994 | 0.172790  | -1.418220 |

# 2

|   |           |          |           |
|---|-----------|----------|-----------|
| O | -2.770398 | 2.342411 | 8.238563  |
| O | -1.815365 | 2.377401 | 10.266783 |
| O | -3.098140 | 5.575500 | 12.241438 |
| O | -0.763349 | 6.650293 | 7.171026  |
| O | -0.703296 | 7.395675 | 9.302163  |
| O | -1.523430 | 6.944077 | 11.407447 |
| O | 0.090103  | 4.129977 | 8.221862  |
| O | 0.297694  | 5.223170 | 12.616188 |
| C | -2.498961 | 4.458404 | 9.422774  |
| C | -2.387469 | 2.962606 | 9.184001  |
| C | -2.155359 | 5.741658 | 11.530256 |
| C | -1.526466 | 4.734556 | 10.578398 |

|   |           |          |           |
|---|-----------|----------|-----------|
| C | -1.313077 | 3.330474 | 11.198145 |
| C | 0.201759  | 3.175329 | 11.341577 |
| C | 0.751062  | 4.607700 | 11.406687 |
| C | -0.118674 | 5.336630 | 10.336169 |
| C | 0.331618  | 5.334280 | 8.886665  |
| C | -0.442106 | 6.512831 | 8.316181  |
| C | -0.396945 | 6.839099 | 10.590578 |
| C | 2.304107  | 4.696693 | 11.317274 |
| C | 2.765486  | 6.153467 | 11.158956 |
| C | 2.878283  | 3.807639 | 10.198326 |
| C | 2.903591  | 4.190380 | 12.643705 |
| H | -0.122498 | 4.339128 | 7.294241  |
| H | 0.552272  | 4.663418 | 13.364481 |
| H | -2.334229 | 5.001721 | 8.493762  |
| H | -3.524257 | 4.658432 | 9.754851  |
| H | -1.866219 | 3.220683 | 12.134480 |
| H | 0.560502  | 2.670106 | 10.440066 |
| H | 0.491554  | 2.576080 | 12.210424 |
| H | 1.391957  | 5.616133 | 8.816666  |
| H | 0.401936  | 7.424768 | 11.039521 |
| H | 3.856249  | 6.203073 | 11.238213 |
| H | 2.496387  | 6.594704 | 10.193967 |
| H | 2.344332  | 6.775466 | 11.955074 |
| H | 3.928931  | 4.067466 | 10.033242 |
| H | 2.846034  | 2.752269 | 10.487450 |
| H | 2.354173  | 3.890307 | 9.243173  |
| H | 3.992798  | 4.139129 | 12.550811 |
| H | 2.681529  | 4.866208 | 13.475573 |
| H | 2.554696  | 3.183135 | 12.896925 |

# C1

|   |           |          |           |
|---|-----------|----------|-----------|
| O | -3.108848 | 2.341353 | 8.439658  |
| O | -1.891075 | 2.376768 | 10.339642 |
| O | -3.126478 | 5.576561 | 12.181521 |
| O | -0.823434 | 6.603948 | 7.177257  |
| O | -0.718139 | 7.390904 | 9.292378  |
| O | -1.527719 | 6.946006 | 11.394841 |
| O | 0.157153  | 4.147063 | 8.209072  |
| O | 0.289561  | 5.185169 | 12.613818 |
| C | -2.370659 | 4.416860 | 9.395519  |
| C | -2.533217 | 2.969866 | 9.286208  |
| C | -2.174284 | 5.749655 | 11.488181 |
| C | -1.507486 | 4.733776 | 10.558037 |
| C | -1.298913 | 3.337893 | 11.204196 |
| C | 0.217242  | 3.168185 | 11.281383 |
| C | 0.763929  | 4.601664 | 11.396883 |
| C | -0.092562 | 5.351736 | 10.335530 |
| C | 0.355994  | 5.352560 | 8.882872  |
| C | -0.462733 | 6.497671 | 8.313409  |
| C | -0.396170 | 6.849852 | 10.584098 |
| C | 2.316797  | 4.700500 | 11.328995 |
| C | 2.768617  | 6.162563 | 11.198445 |
| C | 2.908260  | 3.834365 | 10.202191 |
| C | 2.902083  | 4.175386 | 12.654316 |
| H | -0.145855 | 4.363854 | 7.308433  |
| H | 0.543384  | 4.613249 | 13.353283 |
| H | -2.844775 | 5.113986 | 8.718045  |
| H | -1.799073 | 3.279456 | 12.174073 |
| H | 0.544837  | 2.711607 | 10.342451 |
| H | 0.535994  | 2.527141 | 12.109251 |
| H | 1.406521  | 5.670472 | 8.815180  |
| H | 0.391712  | 7.453144 | 11.029604 |
| H | 3.857132  | 6.221402 | 11.299201 |
| H | 2.513779  | 6.611587 | 10.233008 |
| H | 2.325993  | 6.771243 | 11.993406 |
| H | 3.966119  | 4.084997 | 10.072172 |
| H | 2.854304  | 2.772043 | 10.461174 |
| H | 2.411431  | 3.951684 | 9.236220  |
| H | 3.992410  | 4.128566 | 12.573373 |
| H | 2.668182  | 4.837668 | 13.493753 |
| H | 2.553263  | 3.163291 | 12.888001 |

# C6

|   |           |          |           |
|---|-----------|----------|-----------|
| O | -2.998943 | 2.318545 | 8.339513  |
| O | -1.797550 | 2.383598 | 10.238468 |
| O | -3.093058 | 5.530719 | 12.234419 |
| O | -0.751447 | 6.669023 | 7.172402  |

|   |           |          |           |
|---|-----------|----------|-----------|
| O | -0.710945 | 7.396829 | 9.310016  |
| O | -1.528498 | 6.918097 | 11.411903 |
| O | 0.092280  | 4.142676 | 8.214686  |
| O | 0.314318  | 5.241476 | 12.609017 |
| C | -2.512260 | 4.469373 | 9.397596  |
| C | -2.492704 | 2.962582 | 9.203326  |
| C | -2.150041 | 5.706114 | 11.529397 |
| C | -1.516090 | 4.721481 | 10.545897 |
| C | -1.238698 | 3.330165 | 11.060635 |
| C | 0.217165  | 3.162399 | 11.377961 |
| C | 0.760129  | 4.607755 | 11.408920 |
| C | -0.106124 | 5.339915 | 10.328340 |
| C | 0.344234  | 5.345901 | 8.881724  |
| C | -0.435053 | 6.525571 | 8.318472  |
| C | -0.400519 | 6.834855 | 10.596525 |
| C | 2.312988  | 4.696331 | 11.314747 |
| C | 2.767109  | 6.157015 | 11.170710 |
| C | 2.890381  | 3.823046 | 10.183983 |
| C | 2.912384  | 4.176904 | 12.635314 |
| H | -0.058666 | 4.354851 | 7.276157  |
| H | 0.491686  | 4.656244 | 13.359607 |
| H | -2.307259 | 4.963440 | 8.448905  |
| H | -3.524487 | 4.745134 | 9.711645  |
| H | 0.676135  | 2.579855 | 10.570350 |
| H | 0.412660  | 2.639136 | 12.321294 |
| H | 1.405248  | 5.623926 | 8.807203  |
| H | 0.391253  | 7.427022 | 11.050062 |
| H | 3.857539  | 6.211329 | 11.251119 |
| H | 2.496299  | 6.605174 | 10.209179 |
| H | 2.341588  | 6.769158 | 11.971952 |
| H | 3.926656  | 4.119146 | 9.990857  |
| H | 2.905183  | 2.768424 | 10.476875 |
| H | 2.339166  | 3.881425 | 9.242400  |
| H | 4.002707  | 4.140026 | 12.547034 |
| H | 2.674951  | 4.835690 | 13.476084 |
| H | 2.573320  | 3.161442 | 12.868906 |

# C7

|   |           |          |           |
|---|-----------|----------|-----------|
| O | -2.531523 | 2.366976 | 8.095540  |
| O | -1.613274 | 2.369692 | 10.141686 |
| O | -3.124400 | 5.508402 | 12.242868 |
| O | -0.788009 | 6.705860 | 7.196727  |
| O | -0.745232 | 7.423888 | 9.336871  |
| O | -1.584037 | 6.923682 | 11.421569 |
| O | 0.095456  | 4.186844 | 8.212422  |
| O | 0.371880  | 5.366645 | 12.627413 |
| C | -2.475134 | 4.426361 | 9.404740  |
| C | -2.222204 | 2.962772 | 9.082425  |
| C | -2.185848 | 5.706367 | 11.533519 |
| C | -1.529276 | 4.722494 | 10.576421 |
| C | -1.291717 | 3.313352 | 11.168548 |
| C | 0.162074  | 3.283654 | 11.481143 |
| C | 0.757457  | 4.657835 | 11.428428 |
| C | -0.132297 | 5.358650 | 10.347827 |
| C | 0.320415  | 5.381324 | 8.897380  |
| C | -0.467733 | 6.557215 | 8.340533  |
| C | -0.443388 | 6.852684 | 10.617140 |
| C | 2.304852  | 4.680878 | 11.289193 |
| C | 2.817576  | 6.116773 | 11.103667 |
| C | 2.790110  | 3.750629 | 10.164153 |
| C | 2.916112  | 4.162916 | 12.605494 |
| H | -0.129828 | 4.408555 | 7.290795  |
| H | 0.561920  | 4.798810 | 13.389176 |
| H | -2.366497 | 5.037774 | 8.509915  |
| H | -3.511278 | 4.515025 | 9.752805  |
| H | -1.949916 | 3.118284 | 12.024575 |
| H | 0.683794  | 2.382352 | 11.774972 |
| H | 1.376617  | 5.677198 | 8.832884  |
| H | 0.341769  | 7.441537 | 11.087491 |
| H | 3.911360  | 6.124322 | 11.150219 |
| H | 2.537293  | 6.564189 | 10.145316 |
| H | 2.442998  | 6.759194 | 11.906784 |
| H | 3.861085  | 3.910061 | 10.000028 |
| H | 2.654580  | 2.701171 | 10.444451 |
| H | 2.274391  | 3.887671 | 9.211838  |
| H | 3.998622  | 4.056546 | 12.484861 |
| H | 2.746565  | 4.859479 | 13.432166 |

|   |          |          |           |
|---|----------|----------|-----------|
| H | 2.523593 | 3.178599 | 12.885035 |
|---|----------|----------|-----------|

# C8tBu

|   |           |          |           |
|---|-----------|----------|-----------|
| O | -2.795181 | 2.328409 | 8.272061  |
| O | -1.830538 | 2.382927 | 10.295268 |
| O | -3.095525 | 5.602702 | 12.239154 |
| O | -0.799817 | 6.641432 | 7.154369  |
| O | -0.716829 | 7.397871 | 9.281188  |
| O | -1.514197 | 6.958253 | 11.396796 |
| O | 0.075080  | 4.128715 | 8.205866  |
| O | 0.320160  | 5.247067 | 12.591376 |
| C | -2.512155 | 4.456235 | 9.431779  |
| C | -2.405853 | 2.957582 | 9.209088  |
| C | -2.153345 | 5.759883 | 11.525463 |
| C | -1.531935 | 4.743164 | 10.578006 |
| C | -1.316498 | 3.344329 | 11.212298 |
| C | 0.198623  | 3.186564 | 11.342636 |
| C | 0.748997  | 4.617542 | 11.383774 |
| C | -0.125397 | 5.342491 | 10.318182 |
| C | 0.313976  | 5.335617 | 8.865716  |
| C | -0.466628 | 6.510207 | 8.296817  |
| C | -0.397147 | 6.846208 | 10.568905 |
| C | 2.312341  | 4.682298 | 11.293068 |
| C | 2.786760  | 6.138260 | 11.152611 |
| C | 2.878985  | 3.801440 | 10.160952 |
| C | 2.864340  | 4.152180 | 12.592938 |
| H | -0.151252 | 4.334781 | 7.280936  |
| H | 0.722211  | 4.767246 | 13.333359 |
| H | -2.352001 | 4.989191 | 8.495876  |
| H | -3.534954 | 4.662048 | 9.768226  |
| H | -1.860666 | 3.247176 | 12.154938 |
| H | 0.545522  | 2.668079 | 10.443701 |
| H | 0.503565  | 2.607619 | 12.220110 |
| H | 1.372769  | 5.624129 | 8.789516  |
| H | 0.409314  | 7.430603 | 11.006460 |
| H | 3.878055  | 6.176917 | 11.220186 |
| H | 2.505296  | 6.588276 | 10.195322 |
| H | 2.374093  | 6.751663 | 11.959661 |
| H | 3.942498  | 4.024065 | 10.031265 |
| H | 2.795695  | 2.740531 | 10.414220 |
| H | 2.379155  | 3.937954 | 9.199129  |
| H | 3.191793  | 4.826816 | 13.376394 |
| H | 3.040484  | 3.091070 | 12.728956 |

# C10

|   |           |          |           |
|---|-----------|----------|-----------|
| O | -2.856341 | 2.100277 | 8.466611  |
| O | -1.899961 | 2.302027 | 10.483519 |
| O | -3.227956 | 5.585617 | 12.106506 |
| O | -0.069436 | 6.947287 | 7.198994  |
| O | -0.434911 | 7.489983 | 9.387535  |
| O | -1.622855 | 6.929174 | 11.295185 |
| O | 0.365511  | 4.291370 | 8.128884  |
| O | 0.281964  | 5.204619 | 12.615616 |
| C | -2.454819 | 4.317160 | 9.402708  |
| C | -2.438484 | 2.797132 | 9.340859  |
| C | -2.245401 | 5.730413 | 11.444928 |
| C | -1.557692 | 4.675405 | 10.593030 |
| C | -1.331505 | 3.315359 | 11.305161 |
| C | 0.188306  | 3.147250 | 11.373989 |
| C | 0.739196  | 4.576762 | 11.412885 |
| C | -0.150291 | 5.296612 | 10.346379 |
| C | 0.229008  | 5.353501 | 8.924156  |
| C | -0.087307 | 6.649011 | 8.370095  |
| C | -0.391363 | 6.809639 | 10.636486 |
| C | 2.286926  | 4.695338 | 11.297719 |
| C | 2.710368  | 6.153545 | 11.077943 |
| C | 2.857832  | 3.823618 | 10.170185 |
| C | 2.918070  | 4.220413 | 12.619048 |
| H | 0.377992  | 4.624489 | 7.207846  |
| H | 0.563287  | 4.669448 | 13.372169 |
| H | -2.155164 | 4.734638 | 8.440712  |
| H | -3.489752 | 4.619721 | 9.594381  |
| H | -1.828387 | 3.283903 | 12.277278 |
| H | 0.503797  | 2.642516 | 10.455098 |
| H | 0.516089  | 2.541022 | 12.224448 |
| H | 0.360502  | 7.286060 | 11.259504 |

|   |          |          |           |
|---|----------|----------|-----------|
| H | 3.802996 | 6.220162 | 11.066427 |
| H | 2.351030 | 6.547076 | 10.119916 |
| H | 2.347554 | 6.795827 | 11.886289 |
| H | 3.934893 | 4.004200 | 10.093244 |
| H | 2.720320 | 2.757304 | 10.375493 |
| H | 2.413981 | 4.041273 | 9.196942  |
| H | 4.007670 | 4.215715 | 12.518950 |
| H | 2.674557 | 4.889187 | 13.450723 |
| H | 2.614024 | 3.199973 | 12.878998 |

# C12

|   |           |          |           |
|---|-----------|----------|-----------|
| O | -2.861032 | 2.397035 | 8.242591  |
| O | -1.837351 | 2.374186 | 10.237336 |
| O | -2.992770 | 5.592465 | 12.358617 |
| O | -0.614833 | 6.733161 | 7.156977  |
| O | -0.596470 | 7.404808 | 9.318467  |
| O | -1.462910 | 6.944889 | 11.389085 |
| O | 0.021341  | 4.109347 | 8.192042  |
| O | 0.271279  | 5.157704 | 12.605899 |
| C | -2.528875 | 4.483340 | 9.463838  |
| C | -2.440433 | 2.990389 | 9.188804  |
| C | -2.098384 | 5.731945 | 11.587495 |
| C | -1.530264 | 4.714814 | 10.603046 |
| C | -1.311729 | 3.297459 | 11.185787 |
| C | 0.207980  | 3.135957 | 11.300929 |
| C | 0.747620  | 4.571014 | 11.392215 |
| C | -0.118718 | 5.302033 | 10.320437 |
| C | 0.332704  | 5.290556 | 8.869204  |
| C | -0.347203 | 6.529709 | 8.302891  |
| C | -0.401305 | 6.775736 | 10.549450 |
| C | 2.294613  | 4.705689 | 11.316022 |
| C | 2.692072  | 6.179027 | 11.132503 |
| C | 2.906661  | 3.808410 | 10.224557 |
| C | 2.895085  | 4.246763 | 12.658834 |
| H | -0.110318 | 4.323793 | 7.251743  |
| H | 0.526896  | 4.587960 | 13.346169 |
| H | -2.362696 | 5.044979 | 8.544649  |
| H | -3.546656 | 4.694186 | 9.812126  |
| H | -1.847277 | 3.165553 | 12.129714 |
| H | 0.554881  | 2.651345 | 10.383252 |
| H | 0.511622  | 2.518920 | 12.152610 |
| H | 1.407819  | 5.506858 | 8.811936  |
| H | 3.771197  | 6.290845 | 11.280900 |
| H | 2.462316  | 6.572854 | 10.137585 |
| H | 2.176385  | 6.804556 | 11.867754 |
| H | 3.951462  | 4.093794 | 10.064235 |
| H | 2.898542  | 2.759175 | 10.538036 |
| H | 2.392460  | 3.853291 | 9.261175  |
| H | 3.985505  | 4.211561 | 12.573460 |
| H | 2.653945  | 4.941602 | 13.468849 |
| H | 2.561719  | 3.240000 | 12.937343 |

# C8OH

|   |           |          |           |
|---|-----------|----------|-----------|
| O | -2.717056 | 2.337445 | 8.224457  |
| O | -1.782208 | 2.383160 | 10.262803 |
| O | -3.107417 | 5.595638 | 12.226084 |
| O | -0.793449 | 6.634046 | 7.156522  |
| O | -0.739970 | 7.388477 | 9.284764  |
| O | -1.507017 | 6.950575 | 11.415887 |
| O | 0.094668  | 4.127895 | 8.219858  |
| O | 0.320631  | 5.115211 | 12.631124 |
| C | -2.500474 | 4.453027 | 9.421796  |
| C | -2.358150 | 2.960971 | 9.176165  |
| C | -2.158534 | 5.753875 | 11.523340 |
| C | -1.529600 | 4.741904 | 10.575185 |
| C | -1.321151 | 3.342910 | 11.207114 |
| C | 0.185634  | 3.188714 | 11.399178 |
| C | 0.759340  | 4.643805 | 11.416260 |
| C | -0.124672 | 5.343229 | 10.323697 |
| C | 0.324860  | 5.339074 | 8.874461  |

|   |           |          |           |
|---|-----------|----------|-----------|
| C | -0.466536 | 6.505194 | 8.300344  |
| C | -0.403641 | 6.846611 | 10.569767 |
| C | 2.318039  | 4.694978 | 11.318970 |
| C | 2.781334  | 6.153709 | 11.173186 |
| C | 2.875487  | 3.821878 | 10.180360 |
| C | 2.905766  | 4.165127 | 12.637548 |
| H | -0.118231 | 4.324461 | 7.289713  |
| H | -2.351738 | 5.004578 | 8.494847  |
| H | -3.527248 | 4.631258 | 9.762171  |
| H | -1.897447 | 3.229926 | 12.129105 |
| H | 0.591365  | 2.684355 | 10.516850 |
| H | 0.460166  | 2.635273 | 12.297882 |
| H | 1.381869  | 5.634343 | 8.803031  |
| H | 0.404433  | 7.441113 | 10.993708 |
| H | 3.873275  | 6.199135 | 11.232086 |
| H | 2.493290  | 6.611986 | 10.221138 |
| H | 2.381487  | 6.767460 | 11.988679 |
| H | 3.925449  | 4.081536 | 10.010116 |
| H | 2.846186  | 2.762982 | 10.456102 |
| H | 2.345738  | 3.917286 | 9.229690  |
| H | 3.998333  | 4.165230 | 12.566039 |
| H | 2.611692  | 4.784339 | 13.486970 |
| H | 2.590038  | 3.136343 | 12.836602 |

# C10OH

|   |           |          |           |
|---|-----------|----------|-----------|
| O | -2.910007 | 2.218670 | 8.397411  |
| O | -1.876712 | 2.349399 | 10.381770 |
| O | -3.184389 | 5.549987 | 12.155024 |
| O | -0.614683 | 6.898816 | 7.198439  |
| O | -0.656725 | 7.449431 | 9.380955  |
| O | -1.563013 | 6.921796 | 11.425590 |
| O | 0.074221  | 4.240416 | 8.148869  |
| O | 0.298383  | 5.195805 | 12.621608 |
| C | -2.455876 | 4.403368 | 9.383295  |
| C | -2.452772 | 2.884180 | 9.274798  |
| C | -2.207842 | 5.724969 | 11.492906 |
| C | -1.533024 | 4.720101 | 10.570260 |
| C | -1.314184 | 3.333816 | 11.237257 |
| C | 0.202655  | 3.167416 | 11.319971 |
| C | 0.750297  | 4.598090 | 11.402652 |
| C | -0.129226 | 5.341507 | 10.351088 |
| C | 0.294001  | 5.357022 | 8.886967  |
| C | -0.382555 | 6.636833 | 8.334458  |
| C | -0.406968 | 6.832778 | 10.646560 |
| C | 2.303488  | 4.695853 | 11.307524 |
| C | 2.756225  | 6.150879 | 11.114696 |
| C | 2.885930  | 3.787430 | 10.209313 |
| C | 2.909753  | 4.218903 | 12.641668 |
| H | 0.566607  | 4.633271 | 13.363144 |
| H | -2.188175 | 4.839863 | 8.418444  |
| H | -3.483913 | 4.707628 | 9.607933  |
| H | -1.820871 | 3.275058 | 12.203375 |
| H | 0.526914  | 2.688512 | 10.390963 |
| H | 0.522805  | 2.541128 | 12.158768 |
| H | 1.373307  | 5.568424 | 8.771144  |
| H | 0.379240  | 7.388334 | 11.152294 |
| H | 3.848729  | 6.205265 | 11.156452 |
| H | 2.453858  | 6.582285 | 10.153836 |
| H | 2.360409  | 6.783953 | 11.914893 |
| H | 3.948349  | 4.015980 | 10.077748 |
| H | 2.811665  | 2.733482 | 10.494677 |
| H | 2.403309  | 3.887539 | 9.234251  |
| H | 3.998945  | 4.170892 | 12.547852 |
| H | 2.685062  | 4.909510 | 13.460064 |
| H | 2.566093  | 3.214757 | 12.914923 |

**Table S12** Coordinates and imaginary frequencies of the transition state of the HAT from C10 site of **1B** to each ROS. Level of theory: M06-2X/6-31G(d).

**•OH**

$\nu_{\text{im}} = -1525.7306 \text{ cm}^{-1}$

|   |           |           |           |
|---|-----------|-----------|-----------|
| C | -0.014177 | -0.059857 | 0.088581  |
| C | 0.313644  | 1.394372  | -0.251846 |
| C | -0.980502 | 1.952586  | -0.872526 |
| C | -1.652441 | 0.714855  | -1.529755 |
| C | -0.885280 | -0.531975 | -1.080122 |
| C | -0.097608 | -0.974958 | -2.340006 |
| C | -0.562557 | -2.395932 | -2.603827 |
| C | -2.049874 | -2.368568 | -2.216495 |
| C | -2.017649 | -1.601375 | -0.864694 |
| C | -1.867738 | -2.355319 | 0.447522  |
| C | -2.415101 | -1.380921 | 1.482143  |
| C | -3.219901 | -0.682310 | -0.573448 |
| C | -1.460084 | 0.767821  | -3.048528 |
| C | -1.692775 | 2.518810  | 0.361508  |
| C | -0.523878 | 2.881885  | 1.272343  |
| C | -2.631493 | 3.688339  | 0.114024  |
| C | -2.797330 | -3.719371 | -2.351934 |
| C | -4.236817 | -3.595313 | -1.831425 |
| C | -2.071500 | -4.885906 | -1.665215 |
| C | -2.885925 | -4.044060 | -3.853891 |
| O | 1.109043  | -0.909751 | 0.242776  |
| O | -0.619192 | 2.949653  | -1.791529 |
| O | -0.691251 | -2.994066 | 0.760476  |
| O | -2.213814 | -1.374488 | 2.660123  |
| O | -3.214600 | -0.479837 | 0.851342  |
| O | -3.024979 | 0.533991  | -1.226315 |
| O | -0.525881 | -0.122495 | -3.420193 |
| O | -2.032554 | 1.500982  | -3.802464 |
| O | -0.509810 | 3.644889  | 2.187726  |
| O | 0.589552  | 2.161967  | 0.907694  |
| H | -0.587949 | -0.038278 | 1.025744  |
| H | 1.160484  | 1.472039  | -0.941367 |
| H | 0.983479  | -0.865143 | -2.243863 |
| H | -0.373913 | -2.693220 | -3.637515 |
| H | -0.015592 | -3.068616 | -1.932558 |
| H | -2.555363 | -1.685061 | -2.919681 |
| H | -2.693039 | -3.225297 | 0.532133  |
| H | -4.202867 | -1.059741 | -0.855040 |
| H | -2.241991 | 1.711609  | 0.866423  |
| H | -3.483463 | 3.367022  | -0.491554 |
| H | -2.107758 | 4.499595  | -0.396487 |
| H | -3.000214 | 4.067775  | 1.069087  |
| H | -4.297528 | -3.422947 | -0.753522 |
| H | -4.780815 | -4.524201 | -2.031271 |
| H | -4.767471 | -2.786625 | -2.349808 |
| H | -1.917555 | -4.741982 | -0.595012 |
| H | -1.096651 | -5.067605 | -2.130053 |
| H | -2.666422 | -5.797216 | -1.788223 |
| H | -3.395311 | -3.246238 | -4.406111 |
| H | -3.453517 | -4.968939 | -3.999299 |
| H | -1.897545 | -4.192380 | -4.299708 |
| H | 0.072647  | -2.385893 | 0.677826  |
| H | 1.654733  | -0.564950 | 0.968307  |
| H | -1.384934 | 3.156841  | -2.353981 |
| O | -3.393121 | -4.108578 | 1.291104  |
| H | -2.852496 | -4.047230 | 2.106573  |

**•OOH**

$\nu_{\text{im}} = -1970.2663 \text{ cm}^{-1}$

|   |           |           |           |
|---|-----------|-----------|-----------|
| C | 0.074760  | -0.059889 | 0.018004  |
| C | 0.331867  | 1.419619  | -0.273966 |
| C | -1.000563 | 1.952759  | -0.836146 |
| C | -1.655695 | 0.715920  | -1.510428 |
| C | -0.839981 | -0.517826 | -1.121112 |
| C | -0.099105 | -0.920080 | -2.422359 |
| C | -0.524336 | -2.354793 | -2.681475 |
| C | -1.989255 | -2.388639 | -2.220558 |
| C | -1.929975 | -1.624076 | -0.864134 |
| C | -1.711554 | -2.351559 | 0.445546  |
| C | -2.334376 | -1.460847 | 1.492261  |

|   |           |           |           |
|---|-----------|-----------|-----------|
| C | -3.160985 | -0.749107 | -0.544703 |
| C | -1.522144 | 0.811017  | -3.033957 |
| C | -1.691416 | 2.455166  | 0.436793  |
| C | -0.507770 | 2.827101  | 1.324132  |
| C | -2.675811 | 3.599147  | 0.256959  |
| C | -2.690664 | -3.764325 | -2.325221 |
| C | -4.123973 | -3.678388 | -1.779948 |
| C | -1.900883 | -4.891545 | -1.641380 |
| C | -2.802923 | -4.116164 | -3.819562 |
| O | 1.233232  | -0.876255 | 0.057173  |
| O | -0.701666 | 2.988959  | -1.733898 |
| O | -0.518989 | -2.936374 | 0.759256  |
| O | -2.183102 | -1.500816 | 2.681457  |
| O | -3.164159 | -0.576146 | 0.880159  |
| O | -3.013306 | 0.486194  | -1.174356 |
| O | -0.607932 | -0.071930 | -3.469155 |
| O | -2.126743 | 1.561105  | -3.744745 |
| O | -0.490390 | 3.560131  | 2.263739  |
| O | 0.615669  | 2.155781  | 0.903797  |
| H | -0.444995 | -0.111822 | 0.986129  |
| H | 1.152631  | 1.555132  | -0.985617 |
| H | 0.980740  | -0.772906 | -2.375906 |
| H | -0.378935 | -2.630547 | -3.727980 |
| H | 0.083993  | -3.018177 | -2.054097 |
| H | -2.551985 | -1.720752 | -2.894752 |
| H | -2.553996 | -3.385430 | 0.648727  |
| H | -4.129836 | -1.157733 | -0.831771 |
| H | -2.197838 | 1.614018  | 0.930849  |
| H | -3.535699 | 3.268282  | -0.331989 |
| H | -2.195684 | 4.443305  | -0.242925 |
| H | -3.025859 | 3.935458  | 1.234927  |
| H | -4.172422 | -3.476962 | -0.707611 |
| H | -4.637291 | -4.631537 | -1.942959 |
| H | -4.691089 | -2.904262 | -2.312094 |
| H | -0.977390 | -5.103471 | -2.191396 |
| H | -2.499763 | -5.807915 | -1.641587 |
| H | -1.622557 | -4.680589 | -0.607307 |
| H | -3.356629 | -3.347215 | -4.370084 |
| H | -3.338481 | -5.064055 | -3.936015 |
| H | -1.821424 | -4.234526 | -4.288673 |
| H | 0.238908  | -2.407482 | 0.432306  |
| H | 1.789708  | -0.586690 | 0.798189  |
| H | -1.489163 | 3.182175  | -2.270750 |
| O | -4.085095 | -3.534956 | 1.957492  |
| H | -3.633496 | -3.317001 | 2.796439  |
| O | -3.131586 | -4.237199 | 1.258103  |

**•OCH<sub>3</sub>**

$\nu_{\text{im}} = -1864.0418 \text{ cm}^{-1}$

|   |           |           |           |
|---|-----------|-----------|-----------|
| C | 0.152888  | -0.189558 | 0.164608  |
| C | 0.566617  | 1.241066  | -0.181422 |
| C | -0.670099 | 1.846125  | -0.871541 |
| C | -1.362438 | 0.629111  | -1.546815 |
| C | -0.672612 | -0.641916 | -1.043780 |
| C | 0.163098  | -1.132516 | -2.252844 |
| C | -0.347756 | -2.535078 | -2.529306 |
| C | -1.851506 | -2.437313 | -2.226204 |
| C | -1.860989 | -1.661847 | -0.877641 |
| C | -1.802352 | -2.393698 | 0.451833  |
| C | -2.340513 | -1.382953 | 1.442835  |
| C | -3.035157 | -0.689671 | -0.656028 |
| C | -1.088166 | 0.653221  | -3.053773 |
| C | -1.415813 | 2.459096  | 0.319735  |
| C | -0.277189 | 2.785166  | 1.281600  |
| C | -2.290397 | 3.663778  | 0.013076  |
| C | -2.652722 | -3.750695 | -2.403390 |
| C | -4.116510 | -3.546773 | -1.987816 |
| C | -2.032538 | -4.939958 | -1.655960 |
| C | -2.652630 | -4.090905 | -3.904586 |
| O | 1.222461  | -1.088327 | 0.402649  |
| O | -0.221533 | 2.814646  | -1.782801 |
| O | -0.685221 | -3.103382 | 0.812165  |

|   |           |           |           |
|---|-----------|-----------|-----------|
| O | -2.167998 | -1.337832 | 2.626063  |
| O | -3.093270 | -0.472145 | 0.764089  |
| O | -2.754526 | 0.511022  | -1.310549 |
| O | -0.168522 | -0.275513 | -3.363417 |
| O | -1.590474 | 1.396525  | -3.846933 |
| O | -0.274129 | 3.559959  | 2.187278  |
| O | 0.820905  | 2.014618  | 0.979510  |
| H | -0.470693 | -0.119499 | 1.066097  |
| H | 1.448503  | 1.269629  | -0.829489 |
| H | 1.241075  | -1.067428 | -2.098173 |
| H | -0.115956 | -2.850352 | -3.548791 |
| H | 0.130841  | -3.223757 | -1.823030 |
| H | -2.283587 | -1.735159 | -2.959425 |
| H | -2.728623 | -3.243339 | 0.551316  |
| H | -4.017558 | -1.027381 | -0.985525 |
| H | -2.023254 | 1.682957  | 0.806409  |
| H | -3.125682 | 3.369987  | -0.628636 |
| H | -1.708740 | 4.444678  | -0.481835 |
| H | -2.687366 | 4.072237  | 0.944547  |
| H | -4.240757 | -3.357620 | -0.919069 |
| H | -4.692840 | -4.449420 | -2.216047 |
| H | -4.565464 | -2.719331 | -2.551807 |
| H | -1.925654 | -4.772696 | -0.583806 |
| H | -1.045585 | -5.184959 | -2.062619 |
| H | -2.670436 | -5.820206 | -1.789355 |
| H | -3.078344 | -3.274649 | -4.499113 |
| H | -3.258271 | -4.985970 | -4.080439 |
| H | -1.645253 | -4.297973 | -4.278547 |
| H | 0.108275  | -2.527133 | 0.823877  |
| H | 1.747869  | -0.743988 | 1.143218  |
| H | -0.948735 | 3.044974  | -2.385858 |
| O | -3.533271 | -4.044545 | 1.118774  |
| C | -2.873785 | -4.592175 | 2.226240  |
| H | -3.630906 | -5.208747 | 2.731367  |
| H | -2.030929 | -5.230687 | 1.937161  |
| H | -2.541121 | -3.817789 | 2.928107  |

**\*OOCH<sub>3</sub>**

**$\nu_{\text{im}} = -1958.2931 \text{ cm}^{-1}$**

|   |           |           |           |
|---|-----------|-----------|-----------|
| C | 0.105015  | -0.019461 | -0.042849 |
| C | 0.341091  | 1.458263  | -0.360422 |
| C | -1.020043 | 1.973610  | -0.868808 |
| C | -1.684729 | 0.727767  | -1.516401 |
| C | -0.842451 | -0.494155 | -1.147395 |
| C | -0.132685 | -0.889209 | -2.467291 |
| C | -0.544789 | -2.329667 | -2.709385 |
| C | -1.997256 | -2.378363 | -2.212402 |
| C | -1.913202 | -1.614115 | -0.855167 |
| C | -1.644859 | -2.324929 | 0.454804  |
| C | -2.185656 | -1.390895 | 1.506938  |
| C | -3.144143 | -0.752404 | -0.499863 |
| C | -1.596997 | 0.818674  | -3.043743 |
| C | -1.664175 | 2.467366  | 0.432084  |
| C | -0.448792 | 2.862249  | 1.265363  |
| C | -2.674293 | 3.594379  | 0.292909  |
| C | -2.691020 | -3.757410 | -2.321770 |
| C | -4.123770 | -3.678993 | -1.776496 |
| C | -1.901702 | -4.883801 | -1.639001 |
| C | -2.798779 | -4.104304 | -3.817858 |
| O | 1.267491  | -0.832464 | -0.029222 |
| O | -0.772259 | 3.014419  | -1.776866 |
| O | -0.448417 | -2.930357 | 0.714928  |
| O | -1.880309 | -1.309930 | 2.661935  |
| O | -3.104412 | -0.571800 | 0.921699  |
| O | -3.028435 | 0.484093  | -1.139140 |
| O | -0.681506 | -0.051446 | -3.502131 |
| O | -2.233312 | 1.556163  | -3.739925 |
| O | -0.401534 | 3.600847  | 2.199631  |
| O | 0.666172  | 2.207322  | 0.798638  |
| H | -0.378423 | -0.058948 | 0.942776  |
| H | 1.130322  | 1.595514  | -1.106565 |
| H | 0.945856  | -0.726930 | -2.450685 |
| H | -0.422663 | -2.608201 | -3.758013 |
| H | 0.087258  | -2.981900 | -2.094039 |
| H | -2.579662 | -1.710227 | -2.869470 |
| H | -2.535407 | -3.355200 | 0.707730  |

|   |           |           |           |
|---|-----------|-----------|-----------|
| H | -4.116196 | -1.171395 | -0.759561 |
| H | -2.134968 | 1.619671  | 0.950107  |
| H | -3.554331 | 3.246783  | -0.255136 |
| H | -2.231271 | 4.444102  | -0.231252 |
| H | -2.985148 | 3.928974  | 1.284612  |
| H | -4.166196 | -3.491037 | -0.701419 |
| H | -4.637276 | -4.630316 | -1.950303 |
| H | -4.691933 | -2.898428 | -2.298111 |
| H | -1.689211 | -4.703551 | -0.583906 |
| H | -0.945241 | -5.050851 | -2.146319 |
| H | -2.472674 | -5.815982 | -1.704395 |
| H | -3.332269 | -3.323386 | -4.371652 |
| H | -3.353504 | -5.040414 | -3.939300 |
| H | -1.816900 | -4.243431 | -4.280260 |
| H | 0.302344  | -2.384853 | 0.395336  |
| H | 1.846769  | -0.526331 | 0.687183  |
| H | -1.581519 | 3.192086  | -2.285903 |
| O | -3.412516 | -3.799558 | 2.461705  |
| O | -3.141187 | -4.232709 | 1.190697  |
| C | -2.360123 | -4.229765 | 3.321369  |
| H | -2.636347 | -3.857529 | 4.308693  |
| H | -2.302000 | -5.320982 | 3.315392  |
| H | -1.413310 | -3.784562 | 3.004205  |

**\*OOCH=CH<sub>2</sub>**

**$\nu_{\text{im}} = -1950.3458 \text{ cm}^{-1}$**

|   |           |           |           |
|---|-----------|-----------|-----------|
| C | -0.002035 | -0.286027 | 0.045370  |
| C | 0.305363  | 1.201318  | -0.137323 |
| C | -1.007010 | 1.810815  | -0.668970 |
| C | -1.682262 | 0.649191  | -1.448755 |
| C | -0.905458 | -0.631757 | -1.140968 |
| C | -0.144291 | -0.948921 | -2.453109 |
| C | -0.598015 | -2.346771 | -2.832604 |
| C | -2.074518 | -2.375377 | -2.410295 |
| C | -2.030153 | -1.726784 | -0.992975 |
| C | -1.853087 | -2.550815 | 0.264624  |
| C | -2.417843 | -1.688106 | 1.365620  |
| C | -3.245340 | -0.847466 | -0.628451 |
| C | -1.512498 | 0.858800  | -2.957345 |
| C | -1.700732 | 2.224802  | 0.634114  |
| C | -0.517752 | 2.502062  | 1.556518  |
| C | -2.660520 | 3.399234  | 0.537371  |
| C | -2.809725 | -3.714288 | -2.660127 |
| C | -4.251104 | -3.641872 | -2.137299 |
| C | -2.067614 | -4.921264 | -2.068182 |
| C | -2.896042 | -3.919707 | -4.183241 |
| O | 1.127066  | -1.144783 | 0.054014  |
| O | -0.672898 | 2.909565  | -1.475441 |
| O | -0.697391 | -3.228775 | 0.525164  |
| O | -2.184862 | -1.716508 | 2.537919  |
| O | -3.275264 | -0.785599 | 0.801325  |
| O | -3.051381 | 0.431052  | -1.158087 |
| O | -0.606509 | -0.008131 | -3.440544 |
| O | -2.085138 | 1.674134  | -3.621123 |
| O | -0.493202 | 3.161298  | 2.549211  |
| O | 0.595569  | 1.841264  | 1.094196  |
| H | -0.540591 | -0.383628 | 0.997815  |
| H | 1.137850  | 1.365617  | -0.828969 |
| H | 0.937420  | -0.834404 | -2.371048 |
| H | -0.432367 | -2.546092 | -3.893418 |
| H | -0.023630 | -3.071269 | -2.242294 |
| H | -2.599628 | -1.634457 | -3.036883 |
| H | -2.778334 | -3.572176 | 0.397167  |
| H | -4.216598 | -1.203539 | -0.972117 |
| H | -2.228852 | 1.358172  | 1.056900  |
| H | -3.521884 | 3.132550  | -0.081192 |
| H | -2.159735 | 4.269898  | 0.108102  |
| H | -3.011791 | 3.665409  | 1.536267  |
| H | -4.316454 | -3.535759 | -1.051706 |
| H | -4.785034 | -4.561718 | -2.397233 |
| H | -4.788514 | -2.806934 | -2.604217 |
| H | -1.855953 | -4.829056 | -1.001691 |
| H | -1.115246 | -5.082078 | -2.585023 |
| H | -2.672088 | -5.823589 | -2.208488 |
| H | -3.408017 | -3.082371 | -4.670672 |
| H | -3.461335 | -4.831792 | -4.401006 |

|   |           |           |           |   |           |           |          |
|---|-----------|-----------|-----------|---|-----------|-----------|----------|
| H | -1.907704 | -4.029963 | -4.639597 | C | -1.915193 | -4.648202 | 3.930435 |
| H | 0.091167  | -2.683598 | 0.313026  | H | -1.801463 | -5.671299 | 2.033889 |
| H | 1.676168  | -0.920171 | 0.822567  | H | -2.439306 | -3.883986 | 4.491760 |
| H | -1.449340 | 3.165803  | -2.001704 | H | -1.076897 | -5.158099 | 4.386810 |
| O | -3.388899 | -4.497862 | 0.782674  | O | -3.393945 | -4.359754 | 2.146628 |
| C | -2.279966 | -4.956613 | 2.694397  |   |           |           |          |

**Table S13** Coordinates and imaginary frequencies of the transition state of the HAT from C10OH site of **1B** to each ROS. Level of theory: M06-2X/6-31G(d).

|                                                                  |           |           |           |                                                                  |           |           |           |
|------------------------------------------------------------------|-----------|-----------|-----------|------------------------------------------------------------------|-----------|-----------|-----------|
| <b><sup>•</sup>OH</b>                                            |           |           |           | C                                                                | -0.904782 | -0.628539 | -1.033097 |
| <b><math>\nu_{\text{im}} = -1932.2254 \text{ cm}^{-1}</math></b> |           |           |           | C                                                                | -0.088021 | -1.075089 | -2.272620 |
| C                                                                | 0.249242  | -0.113370 | -0.192584 | C                                                                | -0.578959 | -2.478802 | -2.571403 |
| C                                                                | 0.437105  | 1.388800  | -0.446263 | C                                                                | -2.081853 | -2.406757 | -2.257879 |
| C                                                                | -0.926453 | 1.937768  | -0.898257 | C                                                                | -2.089398 | -1.644384 | -0.900670 |
| C                                                                | -1.631894 | 0.723713  | -1.552230 | C                                                                | -2.112334 | -2.469567 | 0.387898  |
| C                                                                | -0.808422 | -0.530343 | -1.250549 | C                                                                | -2.679950 | -1.469769 | 1.424208  |
| C                                                                | -0.180453 | -0.909210 | -2.613628 | C                                                                | -3.273538 | -0.687952 | -0.682751 |
| C                                                                | -0.634682 | -2.334053 | -2.870797 | C                                                                | -1.327495 | 0.755103  | -2.986727 |
| C                                                                | -2.067401 | -2.360853 | -2.314651 | C                                                                | -1.698934 | 2.394964  | 0.468817  |
| C                                                                | -1.901808 | -1.615531 | -0.959523 | C                                                                | -0.583567 | 2.676574  | 1.470859  |
| C                                                                | -1.634683 | -2.439840 | 0.297486  | C                                                                | -2.579672 | 3.606000  | 0.210108  |
| C                                                                | -2.045801 | -1.456197 | 1.406760  | C                                                                | -2.863820 | -3.734765 | -2.442469 |
| C                                                                | -3.089971 | -0.737905 | -0.530644 | C                                                                | -4.329096 | -3.578693 | -2.007505 |
| C                                                                | -1.622299 | 0.850379  | -3.078840 | C                                                                | -2.216486 | -4.936749 | -1.735953 |
| C                                                                | -1.527574 | 2.414208  | 0.428871  | C                                                                | -2.881154 | -4.047273 | -3.950166 |
| C                                                                | -0.282174 | 2.758206  | 1.240039  | O                                                                | 1.087766  | -1.092412 | 0.245821  |
| C                                                                | -2.515715 | 3.565459  | 0.345199  | O                                                                | -0.478522 | 2.869024  | -1.595653 |
| C                                                                | -2.785458 | -3.733788 | -2.387926 | O                                                                | -1.012571 | -3.184715 | 0.745367  |
| C                                                                | -4.157467 | -3.676054 | -1.699095 | O                                                                | -2.589827 | -1.497236 | 2.617606  |
| C                                                                | -1.946330 | -4.891386 | -1.823798 | O                                                                | -3.371297 | -0.530589 | 0.757756  |
| C                                                                | -3.046885 | -4.037270 | -3.874175 | O                                                                | -2.992370 | 0.532832  | -1.268598 |
| O                                                                | 1.466641  | -0.788848 | -0.306855 | O                                                                | -0.454909 | -0.194855 | -3.355303 |
| O                                                                | -0.693449 | 2.995197  | -1.793402 | O                                                                | -1.819515 | 1.549110  | -3.737018 |
| O                                                                | -0.365458 | -2.974263 | 0.351952  | O                                                                | -0.615322 | 3.401623  | 2.418331  |
| O                                                                | -1.667300 | -1.436464 | 2.546828  | O                                                                | 0.520722  | 1.935131  | 1.153077  |
| O                                                                | -2.956224 | -0.610355 | 0.914161  | H                                                                | -0.610319 | -0.304184 | 1.111036  |
| O                                                                | -2.974769 | 0.504225  | -1.122911 | H                                                                | 1.202844  | 1.324981  | -0.683235 |
| O                                                                | -0.762964 | -0.035390 | -3.603869 | H                                                                | 0.990298  | -0.998246 | -2.134108 |
| O                                                                | -2.278383 | 1.619556  | -3.722069 | H                                                                | -0.348628 | -2.777474 | -3.596338 |
| O                                                                | -0.207100 | 3.468453  | 2.197424  | H                                                                | -0.080929 | -3.161731 | -1.873164 |
| O                                                                | 0.797543  | 2.097987  | 0.730897  | H                                                                | -2.528633 | -1.706784 | -2.983690 |
| H                                                                | -0.150807 | -0.213456 | 0.825196  | H                                                                | -2.941934 | -3.199554 | 0.323742  |
| H                                                                | 1.210469  | 1.555117  | -1.202136 | H                                                                | -4.251365 | -1.019027 | -1.034086 |
| H                                                                | 0.900711  | -0.772955 | -2.640936 | H                                                                | -2.304772 | 1.589156  | 0.905090  |
| H                                                                | -0.561375 | -2.596607 | -3.928495 | H                                                                | -3.402947 | 3.341620  | -0.459584 |
| H                                                                | 0.009469  | -3.001616 | -2.286759 | H                                                                | -1.996248 | 4.415063  | -0.235005 |
| H                                                                | -2.669715 | -1.682920 | -2.942484 | H                                                                | -2.992931 | 3.964158  | 1.155186  |
| H                                                                | -2.381751 | -3.244673 | 0.393566  | H                                                                | -4.454520 | -3.412440 | -0.931862 |
| H                                                                | -4.092152 | -1.121395 | -0.721516 | H                                                                | -4.888129 | -4.487472 | -2.252818 |
| H                                                                | -1.999789 | 1.565183  | 0.941350  | H                                                                | -4.807175 | -2.745745 | -2.536918 |
| H                                                                | -3.419997 | 3.253961  | -0.185399 | H                                                                | -2.115993 | -4.824463 | -0.653728 |
| H                                                                | -2.067494 | 4.416768  | -0.172008 | H                                                                | -1.217083 | -5.134066 | -2.135921 |
| H                                                                | -2.788223 | 3.885039  | 1.353105  | H                                                                | -2.822973 | -5.830320 | -1.918626 |
| H                                                                | -4.098202 | -3.523559 | -0.616016 | H                                                                | -3.330083 | -3.227268 | -4.521364 |
| H                                                                | -4.692985 | -4.617646 | -1.857931 | H                                                                | -3.470250 | -4.951013 | -4.137491 |
| H                                                                | -4.773202 | -2.873182 | -2.122142 | H                                                                | -1.874514 | -4.224092 | -4.339769 |
| H                                                                | -1.627308 | -4.750791 | -0.788221 | H                                                                | -0.140268 | -2.697119 | 1.671778  |
| H                                                                | -1.042911 | -5.045874 | -2.422016 | H                                                                | 1.453295  | -1.036177 | 1.143254  |
| H                                                                | -2.529985 | -5.817048 | -1.869747 | H                                                                | -1.201936 | 3.117147  | -2.195971 |
| H                                                                | -3.654833 | -3.253291 | -4.338897 | O                                                                | 0.170713  | -2.113511 | 2.490859  |
| H                                                                | -3.585671 | -4.985438 | -3.973111 | O                                                                | -0.327405 | -2.776401 | 3.593040  |
| H                                                                | -2.114935 | -4.127070 | -4.439738 | H                                                                | -1.167400 | -2.296110 | 3.739565  |
| H                                                                | 0.159116  | -2.977095 | 1.351909  |                                                                  |           |           |           |
| H                                                                | 1.529296  | -1.416549 | 0.432100  | <b><sup>•</sup>OCH<sub>3</sub></b>                               |           |           |           |
| H                                                                | -1.521018 | 3.206667  | -2.257529 | <b><math>\nu_{\text{im}} = -1989.3601 \text{ cm}^{-1}</math></b> |           |           |           |
| O                                                                | 0.853140  | -2.339910 | 2.117661  | C                                                                | 0.216192  | -0.144210 | -0.166648 |
| H                                                                | 0.208284  | -1.915848 | 2.724711  | C                                                                | 0.430259  | 1.358995  | -0.404196 |
| <b><sup>•</sup>OOH</b>                                           |           |           |           | C                                                                | -0.918581 | 1.923006  | -0.881970 |
| <b><math>\nu_{\text{im}} = -1526.3843 \text{ cm}^{-1}</math></b> |           |           |           | C                                                                | -1.621983 | 0.716461  | -1.553690 |
| C                                                                | -0.034505 | -0.251583 | 0.175708  | C                                                                | -0.818887 | -0.547053 | -1.233376 |
| C                                                                | 0.308859  | 1.226997  | -0.059729 | C                                                                | -0.175906 | -0.942435 | -2.586982 |
| C                                                                | -0.923664 | 1.851058  | -0.736557 | C                                                                | -0.635646 | -2.366928 | -2.830322 |
| C                                                                | -1.590315 | 0.665302  | -1.480380 | C                                                                | -2.076409 | -2.373278 | -2.296594 |
|                                                                  |           |           |           | C                                                                | -1.920989 | -1.620837 | -0.941983 |

|   |           |           |           |
|---|-----------|-----------|-----------|
| C | -1.730069 | -2.456129 | 0.328783  |
| C | -2.182452 | -1.482262 | 1.440356  |
| C | -3.110635 | -0.725567 | -0.547764 |
| C | -1.579811 | 0.840173  | -3.080016 |
| C | -1.541018 | 2.399448  | 0.435447  |
| C | -0.309972 | 2.730799  | 1.272381  |
| C | -2.519046 | 3.557991  | 0.336575  |
| C | -2.810574 | -3.737654 | -2.383908 |
| C | -4.206363 | -3.658220 | -1.746177 |
| C | -2.009347 | -4.906200 | -1.787853 |
| C | -3.026128 | -4.045924 | -3.877120 |
| O | 1.393065  | -0.896507 | -0.312203 |
| O | -0.658955 | 2.981945  | -1.768343 |
| O | -0.541884 | -3.106469 | 0.521604  |
| O | -1.903137 | -1.512234 | 2.598912  |
| O | -3.019090 | -0.578663 | 0.887638  |
| O | -2.973963 | 0.510257  | -1.157837 |
| O | -0.740824 | -0.073373 | -3.590671 |
| O | -2.201843 | 1.626651  | -3.736481 |
| O | -0.243572 | 3.440785  | 2.230269  |
| O | 0.774085  | 2.057745  | 0.784520  |
| H | -0.190905 | -0.260192 | 0.847641  |
| H | 1.219311  | 1.521963  | -1.144482 |
| H | 0.905904  | -0.812658 | -2.608217 |
| H | -0.544857 | -2.647661 | -3.881924 |
| H | -0.006312 | -3.027437 | -2.222000 |
| H | -2.659200 | -1.691247 | -2.938449 |
| H | -2.524244 | -3.219789 | 0.367041  |
| H | -4.108291 | -1.105343 | -0.771667 |
| H | -2.028792 | 1.551362  | 0.934753  |
| H | -3.415039 | 3.253152  | -0.211518 |
| H | -2.055736 | 4.407305  | -0.170507 |
| H | -2.808642 | 3.876583  | 1.340041  |
| H | -4.187758 | -3.502599 | -0.662341 |
| H | -4.748060 | -4.593291 | -1.922329 |
| H | -4.794395 | -2.848524 | -2.194780 |
| H | -1.744899 | -4.780088 | -0.735326 |
| H | -1.077186 | -5.061423 | -2.340229 |
| H | -2.596602 | -5.826838 | -1.874548 |
| H | -3.594915 | -3.249476 | -4.369527 |
| H | -3.587336 | -4.979620 | -3.988437 |
| H | -2.077609 | -4.166661 | -4.408203 |
| H | 0.300321  | -2.561537 | 1.166034  |
| H | 1.758117  | -1.059660 | 0.571512  |
| H | -1.470913 | 3.188403  | -2.261594 |
| O | 0.839672  | -2.079175 | 2.046241  |
| C | 0.788710  | -2.898634 | 3.179892  |
| H | -0.167599 | -2.790718 | 3.698239  |
| H | 0.992144  | -3.946304 | 2.935221  |
| H | 1.583812  | -2.529699 | 3.842820  |

# $\text{'}OOCH}_3$

$\nu_{\text{im}} = -1295.5958 \text{ cm}^{-1}$

|   |           |           |           |
|---|-----------|-----------|-----------|
| C | -0.055925 | -0.250285 | 0.188671  |
| C | 0.280722  | 1.235043  | -0.025748 |
| C | -0.927205 | 1.863634  | -0.741608 |
| C | -1.576481 | 0.682533  | -1.506053 |
| C | -0.921429 | -0.617325 | -1.031718 |
| C | -0.084582 | -1.087349 | -2.249309 |
| C | -0.580198 | -2.490827 | -2.537580 |
| C | -2.088733 | -2.401478 | -2.261755 |
| C | -2.124198 | -1.615942 | -0.916769 |
| C | -2.197198 | -2.426001 | 0.381200  |
| C | -2.809177 | -1.396927 | 1.387790  |
| C | -3.304806 | -0.642513 | -0.756485 |
| C | -1.267950 | 0.762188  | -3.004642 |
| C | -1.738803 | 2.412083  | 0.437353  |
| C | -0.655566 | 2.689067  | 1.474646  |
| C | -2.606309 | 3.625890  | 0.149343  |
| C | -2.875536 | -3.726771 | -2.443312 |
| C | -4.350582 | -3.553863 | -2.049301 |
| C | -2.251413 | -4.918453 | -1.699187 |
| C | -2.858182 | -4.066570 | -3.945052 |
| O | 1.081290  | -1.070834 | 0.243425  |
| O | -0.450709 | 2.880003  | -1.586436 |
| O | -1.100246 | -3.084421 | 0.811370  |

|   |           |           |           |
|---|-----------|-----------|-----------|
| O | -2.767844 | -1.429987 | 2.576739  |
| O | -3.458734 | -0.460923 | 0.672534  |
| O | -2.987696 | 0.566197  | -1.348942 |
| O | -0.421198 | -0.218421 | -3.350774 |
| O | -1.715577 | 1.569399  | -3.769020 |
| O | -0.714469 | 3.416912  | 2.419222  |
| O | 0.452250  | 1.939702  | 1.195726  |
| H | -0.634999 | -0.318300 | 1.122316  |
| H | 1.194902  | 1.336175  | -0.618392 |
| H | 0.990933  | -1.017689 | -2.089370 |
| H | -0.327383 | -2.809830 | -3.551081 |
| H | -0.103910 | -3.164824 | -1.815472 |
| H | -2.511713 | -1.709338 | -3.009112 |
| H | -3.030143 | -3.150508 | 0.316535  |
| H | -4.270835 | -0.969173 | -1.143351 |
| H | -2.361156 | 1.609391  | 0.855355  |
| H | -3.409855 | 3.363126  | -0.544483 |
| H | -2.006166 | 4.431154  | -0.280121 |
| H | -3.046334 | 3.988092  | 1.080735  |
| H | -4.502860 | -3.364423 | -0.981278 |
| H | -4.908667 | -4.464138 | -2.291476 |
| H | -4.809147 | -2.729259 | -2.608198 |
| H | -2.155657 | -4.776445 | -0.620050 |
| H | 1.252314  | -5.140194 | -2.087177 |
| H | -2.868839 | -5.808449 | -1.861814 |
| H | -3.291736 | -3.256014 | -4.541125 |
| H | -3.445130 | -4.972341 | -4.129729 |
| H | -1.843302 | -4.252370 | -4.308075 |
| H | -0.271925 | -2.513877 | 1.745581  |
| H | 1.340614  | -1.180031 | 1.172743  |
| H | -1.149093 | 3.120391  | -2.218692 |
| O | 0.137551  | -2.023439 | 2.582654  |
| O | 0.316878  | -3.036175 | 3.501209  |
| C | -0.776968 | -3.005467 | 4.404782  |
| H | -0.876799 | -2.011005 | 4.846166  |
| H | -1.699687 | -3.265002 | 3.876098  |
| H | -0.533558 | -3.751148 | 5.163320  |

# $\text{'OOCH=CH}_2$

$\nu_{\text{im}} = -1117.3466 \text{ cm}^{-1}$

|   |           |           |           |
|---|-----------|-----------|-----------|
| C | -0.074014 | -0.334279 | 0.191409  |
| C | 0.272212  | 1.154427  | 0.022979  |
| C | -0.931341 | 1.810154  | -0.675841 |
| C | -1.581175 | 0.656153  | -1.480487 |
| C | -0.932004 | -0.660169 | -1.045706 |
| C | -0.091423 | -1.094542 | -2.273443 |
| C | -0.589768 | -2.487031 | -2.607185 |
| C | -2.099319 | -2.403126 | -2.334331 |
| C | -2.138495 | -1.658047 | -0.967618 |
| C | -2.198712 | -2.498843 | 0.310380  |
| C | -2.799977 | -1.491405 | 1.341609  |
| C | -3.316323 | -0.687836 | -0.779651 |
| C | -1.265773 | 0.782242  | -2.974432 |
| C | -1.745598 | 2.320968  | 0.518415  |
| C | -0.666702 | 2.556957  | 1.570140  |
| C | -2.607171 | 3.547508  | 0.268855  |
| C | -2.886586 | -3.722370 | -2.551919 |
| C | -4.359322 | -3.560817 | -2.145423 |
| C | -2.258989 | -4.933841 | -1.843627 |
| C | -2.875621 | -4.018821 | -4.062642 |
| O | 1.055106  | -1.166604 | 0.233753  |
| O | -0.449983 | 2.853016  | -1.484725 |
| O | -1.095117 | -3.153891 | 0.711916  |
| O | -2.723844 | -1.534760 | 2.529568  |
| O | -3.473027 | -0.550680 | 0.655372  |
| O | -2.993350 | 0.539233  | -1.332019 |
| O | -0.420797 | -0.189504 | -3.348106 |
| O | -1.706874 | 1.615578  | -3.714393 |
| O | -0.729679 | 3.246714  | 2.542876  |
| O | 0.442120  | 1.818304  | 1.267930  |
| H | -0.660271 | -0.425422 | 1.117634  |
| H | 1.188902  | 1.271148  | -0.562884 |
| H | 0.983742  | -1.033250 | -2.107195 |
| H | -0.333790 | -2.775470 | -3.629111 |
| H | -0.118275 | -3.183435 | -1.903625 |
| H | -2.519623 | -1.690334 | -3.063642 |



|   |           |           |           |   |           |           |           |
|---|-----------|-----------|-----------|---|-----------|-----------|-----------|
| H | -3.034379 | -3.223600 | 0.242779  | H | -3.457157 | -4.923133 | -4.270323 |
| H | -4.282995 | -0.997404 | -1.178151 | H | -1.861342 | -4.186474 | -4.436196 |
| H | -2.373415 | 1.507054  | 0.905480  | H | -0.318617 | -2.690971 | 1.790315  |
| H | -3.409699 | 3.311123  | -0.435520 | H | 1.346194  | -1.253355 | 1.155470  |
| H | -2.002465 | 4.363844  | -0.132302 | H | -1.143052 | 3.110553  | -2.116140 |
| H | -3.048498 | 3.880311  | 1.210558  | O | 0.174147  | -2.185636 | 2.559010  |
| H | -4.504471 | -3.401680 | -1.071401 | O | 0.093980  | -3.056154 | 3.628883  |
| H | -4.919019 | -4.463891 | -2.409855 | C | -0.780900 | -2.585654 | 4.564051  |
| H | -4.821045 | -2.720657 | -2.677960 | H | -1.144529 | -1.584039 | 4.372654  |
| H | -2.149451 | -4.816282 | -0.762914 | C | -1.090450 | -3.355122 | 5.605555  |
| H | -1.265298 | -5.149879 | -2.248423 | H | -1.753697 | -2.975860 | 6.371177  |
| H | -2.881718 | -5.817554 | -2.019736 | H | -0.683857 | -4.354402 | 5.708787  |
| H | -3.318127 | -3.194512 | -4.632723 |   |           |           |           |

**Table S14** Coordinates and imaginary frequencies of the transition state of the HAT from C10 site of **1B**<sup>•</sup> to each ROS. Level of theory: M06-2X/6-31G(d).

|                                                                  |           |           |           |                                                                  |           |           |           |
|------------------------------------------------------------------|-----------|-----------|-----------|------------------------------------------------------------------|-----------|-----------|-----------|
| <b><sup>•</sup>OH</b>                                            |           |           |           | O                                                                | 2.920390  | 2.874646  | 1.935049  |
| <b><math>\nu_{\text{im}} = -1173.4858 \text{ cm}^{-1}</math></b> |           |           |           | H                                                                | 2.370128  | 3.684322  | 1.899063  |
| C                                                                | -0.041078 | -0.215087 | -1.742643 | <b><sup>•</sup>OOH</b>                                           |           |           |           |
| C                                                                | -1.352293 | 0.478826  | -1.362449 | <b><math>\nu_{\text{im}} = -1997.6109 \text{ cm}^{-1}</math></b> |           |           |           |
| C                                                                | -1.914540 | -0.417337 | -0.217917 | C                                                                | 0.018043  | -0.411261 | -1.675501 |
| C                                                                | -0.641633 | -0.969924 | 0.492625  | C                                                                | -1.308242 | 0.290843  | -1.369318 |
| C                                                                | 0.577194  | -0.602615 | -0.375946 | C                                                                | -1.873627 | -0.521834 | -0.164812 |
| C                                                                | 1.369681  | -1.927445 | -0.380467 | C                                                                | -0.604142 | -1.002404 | 0.602177  |
| C                                                                | 2.449656  | -1.753941 | 0.689850  | C                                                                | 0.622478  | -0.688989 | -0.275512 |
| C                                                                | 2.841559  | -0.265223 | 0.648844  | C                                                                | 1.431363  | -2.000715 | -0.165014 |
| C                                                                | 1.432307  | 0.406746  | 0.466468  | C                                                                | 2.492354  | -1.724185 | 0.901532  |
| C                                                                | 1.442150  | 1.902378  | 0.123966  | C                                                                | 2.871006  | -0.242466 | 0.731070  |
| C                                                                | 0.387225  | 2.569665  | 0.987622  | C                                                                | 1.454335  | 0.396564  | 0.501988  |
| C                                                                | 0.634980  | 0.442390  | 1.823533  | C                                                                | 1.416257  | 1.849790  | 0.050976  |
| C                                                                | -0.625113 | -2.502243 | 0.610072  | C                                                                | 0.363196  | 2.563245  | 0.843499  |
| C                                                                | -2.900147 | 0.327811  | 0.686937  | C                                                                | 0.641573  | 0.515575  | 1.845807  |
| C                                                                | -3.899931 | 0.936208  | -0.334563 | C                                                                | -0.571920 | -2.520706 | 0.840086  |
| C                                                                | -3.553571 | -0.604967 | 1.700859  | C                                                                | -2.881485 | 0.276245  | 0.666951  |
| C                                                                | 3.998096  | 0.025224  | -0.372495 | C                                                                | -3.878880 | 0.784631  | -0.410771 |
| C                                                                | 4.425352  | 1.503275  | -0.416959 | C                                                                | -3.533319 | -0.582919 | 1.745013  |
| C                                                                | 3.672217  | -0.406974 | -1.807331 | C                                                                | 4.006868  | -0.005943 | -0.326283 |
| C                                                                | 5.239777  | -0.753058 | 0.104865  | C                                                                | 5.217729  | -0.867190 | 0.081758  |
| O                                                                | -0.299661 | -1.378824 | -2.502194 | C                                                                | 4.502015  | 1.450221  | -0.331891 |
| O                                                                | -2.547616 | -1.524942 | -0.854878 | C                                                                | 3.617920  | -0.365011 | -1.765552 |
| O                                                                | 1.475181  | 2.327041  | -1.179194 | O                                                                | -0.212522 | -1.633417 | -2.347478 |
| O                                                                | 0.043491  | 3.717752  | 0.929802  | O                                                                | -2.482121 | -1.684449 | -0.722361 |
| O                                                                | 0.026259  | 1.727577  | 1.965774  | O                                                                | 1.508938  | 2.193314  | -1.264214 |
| O                                                                | -0.361722 | -0.517279 | 1.814546  | O                                                                | -0.001748 | 3.701465  | 0.692583  |
| O                                                                | 0.471779  | -2.982191 | -0.025414 | O                                                                | 0.024754  | 1.805909  | 1.895452  |
| O                                                                | -1.380322 | -3.200291 | 1.217076  | O                                                                | -0.349253 | -0.447180 | 1.890295  |
| O                                                                | -3.671038 | 2.120437  | -0.704222 | O                                                                | 0.541646  | -3.034896 | 0.262583  |
| O                                                                | -1.102283 | 1.799628  | -0.940320 | O                                                                | -1.328290 | -3.178152 | 1.489080  |
| H                                                                | 0.611710  | 0.425422  | -2.337631 | O                                                                | -3.668856 | 1.941151  | -0.867102 |
| H                                                                | -2.056411 | 0.470090  | -2.203947 | O                                                                | -1.086449 | 1.646838  | -1.058111 |
| H                                                                | 1.746006  | -2.175756 | -1.370293 | H                                                                | 0.667863  | 0.193449  | -2.309116 |
| H                                                                | 1.984854  | -1.983443 | 1.657419  | H                                                                | -1.999841 | 0.198919  | -2.216359 |
| H                                                                | 3.280132  | -2.449911 | 0.562992  | H                                                                | 1.824809  | -2.325280 | -1.125533 |
| H                                                                | 3.235261  | 0.057695  | 1.622421  | H                                                                | 2.009733  | -1.864336 | 1.877780  |
| H                                                                | 2.393584  | 2.311510  | 0.699786  | H                                                                | 3.330424  | -2.420461 | 0.860603  |
| H                                                                | 1.253608  | 0.292227  | 2.712551  | H                                                                | 3.272314  | 0.157486  | 1.673097  |
| H                                                                | -2.359830 | 1.130936  | 1.194329  | H                                                                | 2.391145  | 2.471416  | 0.705993  |
| H                                                                | -4.213169 | -0.031629 | 2.359660  | H                                                                | 1.249119  | 0.431292  | 2.751525  |
| H                                                                | -2.804150 | -1.118171 | 2.310201  | H                                                                | -2.360410 | 1.126864  | 1.113772  |
| H                                                                | -4.157553 | -1.355037 | 1.187226  | H                                                                | -4.115648 | -1.383782 | 1.286013  |
| H                                                                | 3.703069  | 2.131452  | -0.942341 | H                                                                | -4.213080 | 0.029499  | 2.345542  |
| H                                                                | 5.369267  | 1.572914  | -0.970650 | H                                                                | -2.784570 | -1.030543 | 2.404732  |
| H                                                                | 4.587929  | 1.912879  | 0.583481  | H                                                                | 5.485369  | -0.703866 | 1.132763  |
| H                                                                | 3.583070  | -1.493132 | -1.903416 | H                                                                | 6.083705  | -0.593286 | -0.530229 |
| H                                                                | 4.482174  | -0.089347 | -2.474115 | H                                                                | 5.044657  | -1.936567 | -0.065849 |
| H                                                                | 2.749648  | 0.061197  | -2.165273 | H                                                                | 3.784397  | 2.138417  | -0.784110 |
| H                                                                | 5.511854  | -0.466188 | 1.127517  | H                                                                | 5.415658  | 1.507897  | -0.934924 |
| H                                                                | 6.089895  | -0.518397 | -0.545027 | H                                                                | 4.739336  | 1.802246  | 0.675871  |
| H                                                                | 5.103196  | -1.837213 | 0.078930  | H                                                                | 3.410176  | -1.430645 | -1.893257 |
| H                                                                | 0.532861  | 2.507602  | -1.406407 | H                                                                | 4.453170  | -0.119665 | -2.432250 |
| H                                                                | -1.149650 | -1.744740 | -2.186931 | H                                                                | 2.752913  | 0.214923  | -2.097391 |
| H                                                                | -3.478921 | -1.220209 | -1.009483 | H                                                                | 0.587154  | 2.412141  | -1.535021 |
| H                                                                | -2.027105 | 2.187357  | -0.773878 | H                                                                | -1.063046 | -1.985653 | -2.018227 |
| O                                                                | -4.743863 | 0.136111  | -0.799529 |                                                                  |           |           |           |

|   |           |           |           |
|---|-----------|-----------|-----------|
| H | -3.416310 | -1.406901 | -0.910353 |
| H | -2.018131 | 2.028315  | -0.930995 |
| O | -4.700516 | -0.066738 | -0.822335 |
| O | 2.274179  | 3.696807  | 2.398259  |
| H | 1.633080  | 4.319955  | 2.001220  |
| O | 3.053987  | 3.320382  | 1.328063  |

**<sup>18</sup>OCH<sub>3</sub>**

**$\nu_{\text{im}} = -1537.6790 \text{ cm}^{-1}$**

|   |           |           |           |
|---|-----------|-----------|-----------|
| C | -0.031584 | -0.191482 | -1.726457 |
| C | -1.353850 | 0.486009  | -1.356341 |
| C | -1.922884 | -0.426678 | -0.228388 |
| C | -0.656401 | -0.978613 | 0.493319  |
| C | 0.570360  | -0.602310 | -0.358327 |
| C | 1.361700  | -1.928160 | -0.376599 |
| C | 2.443517  | -1.767116 | 0.693825  |
| C | 2.835428  | -0.278075 | 0.665747  |
| C | 1.421865  | 0.392825  | 0.505434  |
| C | 1.405848  | 1.894046  | 0.204570  |
| C | 0.355674  | 2.532961  | 1.082786  |
| C | 0.632226  | 0.390950  | 1.870823  |
| C | -0.638364 | -2.512048 | 0.598916  |
| C | -2.923749 | 0.303002  | 0.671794  |
| C | -3.919060 | 0.909903  | -0.355342 |
| C | -3.579937 | -0.641546 | 1.672896  |
| C | 3.984849  | 0.019798  | -0.361293 |
| C | 4.402543  | 1.499271  | -0.404528 |
| C | 3.655911  | -0.410505 | -1.796019 |
| C | 5.233002  | -0.753148 | 0.107631  |
| O | -0.269336 | -1.341497 | -2.513461 |
| O | -2.538000 | -1.532362 | -0.885613 |
| O | 1.457092  | 2.372832  | -1.076047 |
| O | -0.068891 | 3.650454  | 1.003705  |
| O | 0.070889  | 1.684192  | 2.087794  |
| O | -0.397683 | -0.534949 | 1.821517  |
| O | 0.463701  | -2.986052 | -0.033143 |
| O | -1.395334 | -3.216277 | 1.196307  |
| O | -3.703362 | 2.100613  | -0.708453 |
| O | -1.119938 | 1.803447  | -0.919886 |
| H | 0.624140  | 0.468269  | -2.297270 |
| H | -2.046588 | 0.477175  | -2.207390 |
| H | 1.737021  | -2.165578 | -1.369162 |
| H | 1.980696  | -2.007242 | 1.659902  |
| H | 3.273990  | -2.461529 | 0.557913  |
| H | 3.238533  | 0.032949  | 1.639944  |
| H | 2.359200  | 2.328863  | 0.840238  |
| H | 1.250632  | 0.170947  | 2.745949  |
| H | -2.394135 | 1.107143  | 1.189757  |
| H | -4.255710 | -0.078729 | 2.324335  |
| H | -2.833320 | -1.148153 | 2.291008  |
| H | -4.167319 | -1.396663 | 1.147454  |
| H | 3.659331  | 2.125320  | -0.903530 |
| H | 5.330533  | 1.579337  | -0.983244 |
| H | 4.586079  | 1.898017  | 0.596707  |
| H | 3.573374  | -1.496766 | -1.895339 |
| H | 4.461656  | -0.085893 | -2.464438 |
| H | 2.729144  | 0.052066  | -2.150010 |
| H | 5.510287  | -0.466019 | 1.128791  |
| H | 6.077977  | -0.513952 | -0.547372 |
| H | 5.100977  | -1.837912 | 0.081644  |
| H | 0.517700  | 2.570264  | -1.304870 |
| H | -1.119100 | -1.721266 | -2.214212 |
| H | -3.470887 | -1.233594 | -1.046142 |
| H | -2.045341 | 2.183829  | -0.755834 |
| O | -4.745505 | 0.101767  | -0.839405 |
| O | 2.989060  | 3.119218  | 1.739257  |
| C | 3.083947  | 4.338265  | 1.067935  |
| H | 2.119774  | 4.627190  | 0.627105  |
| H | 3.334874  | 5.093069  | 1.827462  |
| H | 3.865945  | 4.336596  | 0.294698  |

**<sup>18</sup>OOCH<sub>3</sub>**

**$\nu_{\text{im}} = -2011.6274 \text{ cm}^{-1}$**

|   |           |           |           |
|---|-----------|-----------|-----------|
| C | 0.075360  | -0.418015 | -1.664509 |
| C | -1.266001 | 0.267715  | -1.392861 |
| C | -1.855880 | -0.553434 | -0.205965 |

|   |           |           |           |
|---|-----------|-----------|-----------|
| C | -0.603862 | -1.027647 | 0.593249  |
| C | 0.642050  | -0.698972 | -0.250064 |
| C | 1.459108  | -2.006875 | -0.123753 |
| C | 2.491249  | -1.721171 | 0.965992  |
| C | 2.864121  | -0.240003 | 0.789593  |
| C | 1.443391  | 0.388874  | 0.556330  |
| C | 1.397554  | 1.856949  | 0.143159  |
| C | 0.310463  | 2.537295  | 0.926582  |
| C | 0.613668  | 0.475762  | 1.893769  |
| C | -0.567273 | -2.547237 | 0.823131  |
| C | -2.890965 | 0.234036  | 0.601814  |
| C | -3.864950 | 0.737934  | -0.499251 |
| C | -3.563279 | -0.634062 | 1.660010  |
| C | 3.991763  | 0.006283  | -0.277413 |
| C | 5.164828  | -0.940391 | 0.039190  |
| C | 4.551579  | 1.435863  | -0.184871 |
| C | 3.571051  | -0.216147 | -1.736248 |
| O | -0.120995 | -1.637445 | -2.352767 |
| O | -2.439389 | -1.718422 | -0.785089 |
| O | 1.522185  | 2.252234  | -1.154363 |
| O | -0.137315 | 3.634765  | 0.737875  |
| O | 0.003473  | 1.764100  | 1.981011  |
| O | -0.387468 | -0.481702 | 1.891593  |
| O | 0.568272  | -3.049644 | 0.278665  |
| O | -1.337178 | -3.214992 | 1.445222  |
| O | -3.656432 | 1.898724  | -0.943709 |
| O | -1.060995 | 1.622874  | -1.072506 |
| H | 0.735745  | 0.200433  | -2.273716 |
| H | -1.934110 | 0.171667  | -2.258233 |
| H | 1.880658  | -2.328811 | -1.073296 |
| H | 1.984390  | -1.852164 | 1.931276  |
| H | 3.333194  | -2.413640 | 0.955730  |
| H | 3.265371  | 0.163601  | 1.728856  |
| H | 2.361825  | 2.384289  | 0.889574  |
| H | 1.210448  | 0.353960  | 2.802151  |
| H | -2.387782 | 1.087139  | 1.064965  |
| H | -4.263502 | -0.029388 | 2.244705  |
| H | -2.827992 | -1.077505 | 2.337391  |
| H | -4.126580 | -1.438149 | 1.183151  |
| H | 5.437352  | -0.899079 | 1.100887  |
| H | 6.042778  | -0.643658 | -0.544594 |
| H | 4.942255  | -1.980022 | -0.217821 |
| H | 3.842225  | 2.187722  | -0.537129 |
| H | 5.437781  | 1.511334  | -0.825941 |
| H | 4.851259  | 1.687695  | 0.836991  |
| H | 3.236252  | -1.236514 | -1.937824 |
| H | 4.436338  | -0.030101 | -2.384228 |
| H | 2.785740  | 0.484304  | -2.027703 |
| H | 0.599152  | 2.442614  | -1.446224 |
| H | -0.976355 | -2.001061 | -2.049478 |
| H | -3.370647 | -1.446872 | -0.996074 |
| H | -1.994465 | 2.000121  | -0.961532 |
| O | -4.666040 | -0.120877 | -0.936875 |
| O | 2.240249  | 3.677669  | 2.513932  |
| O | 3.069840  | 2.844970  | 1.807847  |
| C | 2.285874  | 4.964342  | 1.912430  |
| H | 1.953356  | 4.902613  | 0.872803  |
| H | 1.584196  | 5.573069  | 2.485061  |
| H | 3.000378  | 5.370502  | 1.975542  |

**<sup>18</sup>OOCH=CH<sub>2</sub>**

**$\nu_{\text{im}} = -2007.5302 \text{ cm}^{-1}$**

|   |           |           |           |
|---|-----------|-----------|-----------|
| C | 0.003177  | -0.473573 | -1.732354 |
| C | -1.301230 | 0.306686  | -1.548260 |
| C | -1.882029 | -0.272939 | -0.222529 |
| C | -0.622525 | -0.653483 | 0.613620  |
| C | 0.607099  | -0.530454 | -0.305873 |
| C | 1.376295  | -1.830833 | 0.023818  |
| C | 2.454143  | -1.409274 | 1.022122  |
| C | 2.881017  | 0.003650  | 0.588320  |
| C | 1.479178  | 0.643319  | 0.279230  |
| C | 1.467430  | 2.010032  | -0.400829 |
| C | 0.429318  | 2.868771  | 0.271137  |
| C | 0.691033  | 0.999108  | 1.597491  |
| C | -0.635266 | -2.110155 | 1.105021  |
| C | -2.859880 | 0.685442  | 0.462847  |

|   |           |           |           |
|---|-----------|-----------|-----------|
| C | -3.850801 | 1.031214  | -0.683129 |
| C | -3.527920 | 0.044018  | 1.674225  |
| C | 3.993281  | 0.010031  | -0.521888 |
| C | 4.582220  | 1.414636  | -0.734330 |
| C | 3.541117  | -0.501819 | -1.895540 |
| C | 5.155869  | -0.874782 | -0.032634 |
| O | -0.264216 | -1.784017 | -2.190445 |
| O | -2.527189 | -1.494733 | -0.573765 |
| O | 1.561071  | 2.140393  | -1.750474 |
| O | 0.038112  | 3.945612  | -0.077245 |
| O | 0.134757  | 2.309240  | 1.461466  |
| O | -0.344914 | 0.101746  | 1.789299  |
| O | 0.459143  | -2.748774 | 0.623419  |
| O | -1.407432 | -2.624647 | 1.856441  |
| O | -3.613101 | 2.086824  | -1.329725 |
| O | -1.037879 | 1.687672  | -1.470103 |
| H | 0.665776  | -0.000888 | -2.458151 |
| H | -2.000102 | 0.092910  | -2.366874 |
| H | 1.752007  | -2.327855 | -0.867331 |
| H | 1.974857  | -1.354406 | 2.008540  |
| H | 3.267482  | -2.130248 | 1.106746  |
| H | 3.320875  | 0.542448  | 1.438583  |
| H | 2.450592  | 2.654625  | 0.174594  |
| H | 1.306990  | 1.020121  | 2.501338  |
| H | -2.310426 | 1.584234  | 0.755518  |
| H | -4.136533 | -0.806071 | 1.360920  |
| H | -4.185343 | 0.770390  | 2.162094  |
| H | -2.787279 | -0.305464 | 2.399125  |

|   |           |           |           |
|---|-----------|-----------|-----------|
| H | 3.886785  | 2.088258  | -1.239701 |
| H | 5.466582  | 1.330865  | -1.376857 |
| H | 4.886858  | 1.875224  | 0.209140  |
| H | 3.222067  | -1.546789 | -1.879334 |
| H | 4.385578  | -0.436915 | -2.592260 |
| H | 2.735404  | 0.115179  | -2.299687 |
| H | 5.455514  | -0.611024 | 0.988956  |
| H | 6.024158  | -0.730716 | -0.684412 |
| H | 4.909984  | -1.940117 | -0.054198 |
| H | 0.647062  | 2.361721  | -2.048016 |
| H | -1.122136 | -2.051897 | -1.805713 |
| H | -3.454506 | -1.225449 | -0.803879 |
| H | -1.955279 | 2.114772  | -1.405631 |
| O | -4.698190 | 0.145077  | -0.941534 |
| O | 3.003840  | 2.993905  | 2.177202  |
| O | 3.148240  | 3.450999  | 0.885596  |
| C | 2.149012  | 3.807951  | 2.886229  |
| H | 1.583683  | 4.493812  | 2.263425  |
| C | 2.064890  | 3.683841  | 4.203696  |
| H | 2.670702  | 2.963801  | 4.742123  |
| H | 1.364225  | 4.295792  | 4.755475  |

**Table S15** Coordinates of the structures of the five ROSs, their anion and protonated forms. Level of theory: M06-2X/6-31G(d).

|                       |           |          |           |
|-----------------------|-----------|----------|-----------|
| <b><sup>•</sup>OH</b> |           |          |           |
| O                     | -0.006151 | 0.000000 | -1.510008 |
| H                     | -0.006151 | 0.000000 | -2.488867 |

|                       |           |          |           |
|-----------------------|-----------|----------|-----------|
| <b>OH<sup>-</sup></b> |           |          |           |
| O                     | -0.550614 | 0.488866 | -2.277544 |
| H                     | -0.550614 | 0.488866 | -1.295288 |

|            |           |           |           |
|------------|-----------|-----------|-----------|
| <b>HOH</b> |           |           |           |
| O          | 0.019792  | -0.005769 | -1.526814 |
| H          | 0.002994  | -0.002034 | -2.492171 |
| H          | -0.889189 | 0.196357  | -1.271714 |

|                        |           |           |          |
|------------------------|-----------|-----------|----------|
| <b><sup>•</sup>OOH</b> |           |           |          |
| O                      | 0.055503  | 0.709875  | 0.000000 |
| O                      | 0.055503  | -0.601901 | 0.000000 |
| H                      | -0.888054 | -0.863793 | 0.000000 |

|                        |          |          |           |
|------------------------|----------|----------|-----------|
| <b>OOH<sup>-</sup></b> |          |          |           |
| O                      | 2.522055 | 0.157483 | -1.973079 |
| O                      | 2.525399 | 0.629765 | -0.561396 |
| H                      | 3.346251 | 0.215549 | -0.260456 |

|             |           |           |           |
|-------------|-----------|-----------|-----------|
| <b>HOOH</b> |           |           |           |
| O           | 0.000000  | 0.713705  | -0.055572 |
| O           | 0.000000  | -0.713705 | -0.055572 |
| H           | -0.812252 | -0.891397 | 0.444578  |
| H           | 0.812252  | 0.891397  | 0.444578  |

|                                    |           |           |           |
|------------------------------------|-----------|-----------|-----------|
| <b><sup>•</sup>OCH<sub>3</sub></b> |           |           |           |
| C                                  | -0.009738 | -0.577810 | 0.000000  |
| H                                  | 1.056999  | -0.867510 | 0.000000  |
| H                                  | -0.460335 | -1.006509 | 0.905992  |
| H                                  | -0.460335 | -1.006509 | -0.905992 |
| O                                  | -0.009738 | 0.793424  | 0.000000  |

|                                    |          |           |           |
|------------------------------------|----------|-----------|-----------|
| <b>OCH<sub>3</sub><sup>-</sup></b> |          |           |           |
| O                                  | 2.523901 | 0.154594  | -1.978199 |
| C                                  | 2.524112 | -0.263964 | -3.222639 |
| H                                  | 3.546534 | -0.440273 | -3.721296 |
| H                                  | 2.004624 | -1.267193 | -3.443408 |
| H                                  | 2.020340 | 0.411634  | -4.007467 |

|                         |           |           |           |
|-------------------------|-----------|-----------|-----------|
| <b>HOCH<sub>3</sub></b> |           |           |           |
| C                       | -0.046785 | 0.658091  | 0.000000  |
| H                       | -1.091646 | 0.973590  | 0.000000  |
| H                       | 0.437523  | 1.077763  | 0.891937  |
| H                       | 0.437523  | 1.077763  | -0.891937 |
| O                       | -0.046785 | -0.753213 | 0.000000  |
| H                       | 0.871595  | -1.051960 | 0.000000  |

|                                    |           |           |           |
|------------------------------------|-----------|-----------|-----------|
| <b><sup>•</sup>OCH<sub>3</sub></b> |           |           |           |
| O                                  | 1.169320  | -0.278307 | 0.000017  |
| O                                  | 0.157975  | 0.542855  | -0.000016 |
| C                                  | -1.081506 | -0.181434 | -0.000021 |
| H                                  | -1.130743 | -0.801366 | -0.896590 |
| H                                  | -1.131372 | -0.800256 | 0.897305  |
| H                                  | -1.867213 | 0.573839  | -0.000590 |

|                                    |          |           |           |
|------------------------------------|----------|-----------|-----------|
| <b>OCH<sub>3</sub><sup>-</sup></b> |          |           |           |
| O                                  | 2.494591 | -0.199201 | -1.843874 |
| C                                  | 2.559683 | -0.338526 | -3.204296 |
| H                                  | 3.586722 | -0.576807 | -3.550937 |
| H                                  | 1.882866 | -1.157251 | -3.525383 |
| H                                  | 2.263238 | 0.590156  | -3.734480 |
| O                                  | 3.418155 | 0.893252  | -1.544405 |

|                         |           |           |           |
|-------------------------|-----------|-----------|-----------|
| <b>HOCH<sub>3</sub></b> |           |           |           |
| O                       | -1.147069 | 0.270796  | 0.102545  |
| O                       | -0.025279 | -0.605400 | 0.019773  |
| H                       | -1.569086 | 0.104132  | -0.756207 |
| C                       | 1.115476  | 0.222340  | -0.021549 |
| H                       | 1.963984  | -0.466065 | -0.031970 |
| H                       | 1.125724  | 0.842163  | -0.925757 |
| H                       | 1.165302  | 0.862565  | 0.864682  |

|                                        |           |           |           |
|----------------------------------------|-----------|-----------|-----------|
| <b><sup>•</sup>OOCH=CH<sub>2</sub></b> |           |           |           |
| C                                      | -1.389731 | -0.500063 | 0.000186  |
| C                                      | -0.628608 | 0.583193  | -0.000384 |
| H                                      | -0.954065 | -1.490586 | 0.001155  |
| H                                      | -2.466422 | -0.390841 | -0.000307 |
| H                                      | -0.972696 | 1.610046  | -0.001325 |
| O                                      | 0.762674  | 0.580046  | 0.000699  |
| O                                      | 1.300227  | -0.608472 | -0.000491 |

**OOCH=CH<sub>2</sub>**

|   |          |           |           |
|---|----------|-----------|-----------|
| O | 2.533068 | 0.394032  | -2.323683 |
| O | 3.558455 | -0.554886 | -1.974332 |
| C | 1.497424 | -0.171810 | -2.903664 |
| H | 0.738295 | 0.580351  | -3.155545 |
| C | 1.295730 | -1.471999 | -3.192864 |
| H | 2.059177 | -2.190542 | -2.934028 |
| H | 0.375610 | -1.781727 | -3.678703 |

**HOOCCH=CH<sub>2</sub>**

|   |           |           |           |
|---|-----------|-----------|-----------|
| C | 1.406517  | -0.554260 | 0.001289  |
| C | 0.696641  | 0.565615  | 0.013829  |
| H | 0.940238  | -1.527673 | -0.060358 |
| H | 2.485961  | -0.488479 | 0.033521  |
| H | 1.124964  | 1.562825  | 0.054755  |
| O | -0.663060 | 0.702224  | -0.016204 |
| O | -1.287489 | -0.566962 | -0.101344 |
| H | -1.565717 | -0.696899 | 0.821765  |
